# Supplementary material for: CCL5 promotes breast cancer recurrence through macrophage recruitment in residual tumors
Source: eLife journal article supplement (doi:10.7554/elife.43653), 2019-04-15
Supplement: supp [file elife-43653-supp-v1.zip]

Archive with 10 entries (10 files):
- elife_poa_e43653_Figure_3_source_data_1.xlsx
- elife_poa_e43653_Figure_6_source_data_1.xlsx
- elife_poa_e43653_Figure_5_figure_supplement_2.pdf
- elife_poa_e43653_Figure_3_figure_supplement_1.pdf
- elife_poa_e43653_Figure_6_source_data_2.xlsx
- elife_poa_e43653_Transparent_Reporting_File.pdf
- elife_poa_e43653_Figure_5_figure_supplement_1.pdf
- elife_poa_e43653_Figure_6_figure_supplement_1.jpg
- elife_poa_e43653_Figure_1_figure_supplement_1.pdf
- elife_poa_e43653_Figure_2_figure_supplement_1.jpg
