# Supplementary material for: CCL5 promotes breast cancer recurrence through macrophage recruitment in residual tumors
Source: eLife journal article supplement (doi:10.7554/elife.43653), 2019-04-15
Supplement: supp [file elife-43653-supp-v1.zip › elife_poa_e43653_Figure_3_source_data_1.xlsx]

## Sheet: Sheet1
Source Data Figure 3 - Cytokine concentration (pg/mL) in primary and residual tumors
Identifier	1507-4L	1507-4R	1510-4L	1510-4R	1503-4L	1503-4R	1505-4L	1505-4R	1511-4L	1511-4R	1502-4L	1502-4R	1504-4L	1504-4R	1509-4L	1509-4R	Fold Change	p-value	log2(Fold Change)	-LOG10(p-value)
Cytokine	Primary	Primary	Primary	Primary	Residual	Residual	Residual	Residual	Residual	Residual	Residual	Residual	Residual	Residual	Residual	Residual
AR	32.0608	32.7199	28.1006	28.9267	3.95135	3.66449	4.78056	4.37798	4.0467	10.7317	2.71857	1.98154	3.44973	3.20827	4.38335	4.02554	0.140439	7.08348e-12	-2.83198	11.1498
Axl	651.808	986.444	601.225	925.583	898.066	366.802	587.122	429.63	726.277	558.753	641.652	382.109	582.134	373.851	624.026	328.612	0.684456	0.0279718	-0.54697	1.55328
CD27L	79.5178	17.0192	98.0889	20.4331	76.7329	15.0815	86.9984	72.7441	42.0264	76.3989	54.4149	14.0983	80.8673	10.5224	6.78636	21.8586	0.865701	0.717007	-0.208059	0.144477
CD30	14.2978	13.1497	9.44225	5.32358	14.6037	12.9719	11.2402	9.24511	15.1905	9.39574	13.9152	10.1239	17.7767	11.2414	11.3645	13.8626	1.19181	0.256924	0.25316	0.590195
CD40	322.786	249.568	646.75	275.246	566.273	429.968	307.761	132.676	421.271	194.698	358.783	156.749	218.924	180.453	258.261	188.817	0.761676	0.309949	-0.392751	0.50871
CXCL16	18.754	16.4138	125.785	13.5968	15.5412	12.1708	27.4185	13.1866	3.9018	14.1176	18.1307	8.60806	16.9468	18.4747	10.0234	9.71442	0.321274	0.0678461	-1.63812	1.16847
E-selectin	31.3972	27.3858	34.9365	18.2981	30.9843	30.5024	41.061	53.1811	34.1081	45.3914	31.3882	28.5091	61.3175	42.8104	28.4923	54.5309	1.43512	0.0665804	0.521173	1.17665
EGF	14.7957	31.1298	5.45218	9.49708	6.15344	12.8285	20.4633	20.2971	13.0678	60.1676	3.08748	14.8941	23.7973	26.5388	2.37452	23.1436	1.24197	0.667703	0.312628	0.175417
Fractalkine	406.951	623.574	1477.23	503.509	468.858	182.807	925.09	1159.06	571.476	1765.25	422.529	353.988	574.932	264.827	417.641	497.503	0.841725	0.658624	-0.248578	0.181363
GITR	61.7591	47.3421	37.4194	25.2288	119.867	255.189	46.1608	36.3592	123.791	121.736	61.5342	32.6924	114.074	64.5307	29.1901	86.6526	2.11893	0.163684	1.08334	0.785993
GM-CSF	1.63714	0.946845	7.49597	0.967181	1.81029	NA	0.0985526	7.64058	3.56745	NA	NA	NA	NA	NA	NA	NA	1.18735	0.826897	0.247751	0.0825486
HGF	100.773	76.1835	150.645	75.7352	170.488	120.319	463.328	248.62	219.746	332.887	240.258	121.959	328.03	281.688	142.225	147.451	2.32808	0.0267865	1.21914	1.57208
I-TAC	2.16563	11.9377	15.6828	12.008	18.094	20.4528	16.6659	3.35635	8.15028	61.8862	85.9151	23.0471	43.755	18.05	19.5697	21.119	2.7122	0.168573	1.43946	0.773213
IFNg	0.679445	0.141008	21.599	14.4818	18.4138	NA	3.54537	NA	12.3354	NA	NA	NA	NA	NA	NA	NA	1.23915	0.772548	0.309349	0.112074
IGF-1	10363.7	1501.83	842.13	144.634	157220	277155	353582	187972	3.39715e+06	879282	80279.6	55962.2	2.17573e+06	60703	424466	1.46254e+06	246.701	0.163489	7.94662	0.78651
IGFBP-2	217.076	527.671	338.308	177.034	212.403	266.78	247.778	236.14	191.017	238.79	129.508	169.337	119.91	228.664	158.599	275.458	0.654553	0.046471	-0.611418	1.33282
IGFBP-3	434.755	4787.34	8534.79	10786.7	1370.28	409.909	683.626	3023.15	424.54	354.297	393.322	333.575	492.872	1364.18	1102.24	405.273	0.140665	0.0010215	-2.82966	2.99076
IGFBP-5	289.098	107.867	329.636	58.9966	270.095	78.4063	561.346	361.068	119.773	308.643	345.944	255.557	143.48	112.657	203.866	183.833	1.24944	0.542202	0.321282	0.265839
IGFBP-6	47.7724	58.1726	116.715	33.8258	584.733	250.215	666.515	684.423	427.96	758.056	472.347	370.206	810.805	346.218	835.378	513.332	8.73366	0.000197244	3.12659	3.705
IL-10	6.74459	13.5268	10.7347	4.00926	4.84715	NA	9.984	13.3467	9.21158	NA	NA	NA	NA	NA	NA	NA	1.0678	0.835537	0.0946427	0.0780343
IL-12A	6.94391	10.9741	9.2893	4.77831	6.87857	NA	9.67539	13.8331	3.9475	NA	NA	NA	NA	NA	NA	NA	1.07344	0.822279	0.102238	0.0849808
IL-12p70	11.4582	11.0898	34.1695	9.34088	8.45076	6.95953	20.66	16.7962	15.4526	14.675	10.3288	9.1097	6.64457	7.48078	10.0331	8.9337	0.683864	0.202655	-0.548219	0.693243
IL-13	95.337	249.834	202.978	156.145	255.734	NA	516.757	683.197	274.958	NA	NA	NA	NA	NA	NA	NA	2.45728	0.0545244	1.29706	1.26341
IL-17	1.19966	1.9161	1.72365	1.92687	1.76607	NA	1.22805	3.0178	2.23908	NA	NA	NA	NA	NA	NA	NA	1.21943	0.406617	0.286207	0.390814
IL-17E	90.9624	110.28	265.431	124.129	68.1137	101.484	246.333	129.235	71.4675	266.031	83.0974	80.399	290.44	60.0883	97.5247	68.5801	0.881735	0.724718	-0.181583	0.139831
IL-17F	15.6261	15.1294	19.8505	5.6555	13.499	15.0863	18.3242	20.8646	19.0711	51.6477	16.7966	21.2776	48.4695	15.7367	15.8459	16.4276	1.61772	0.224114	0.693966	0.649531
IL-1a	18.5047	36.1587	30.1943	20.2944	17.0688	NA	45.7355	55.4927	33.1893	NA	NA	NA	NA	NA	NA	NA	1.44064	0.259023	0.52671	0.586661
IL-1b	1.53521	1.81453	1.62416	1.66299	3.68843	NA	0.739236	2.4017	2.29974	NA	NA	NA	NA	NA	NA	NA	1.37551	0.343875	0.459965	0.463599
IL-1ra	3524.44	3199.29	1516.97	2897.42	3901.63	3274.32	2350.57	1189.49	5924.54	3767.88	711.441	158.794	5961.33	4617.9	1000.21	1709.56	1.03452	0.92833	0.0489562	0.0322977
IL-2	1.09507	2.84343	3.66234	0.972969	2.1565	NA	2.27846	0.571574	3.72509	NA	NA	NA	NA	NA	NA	NA	1.01841	0.967335	0.026314	0.014423
IL-2 Ra	29.1177	26.6522	42.9294	17.391	8.61615	26.6378	16.5645	16.2022	10.1771	34.7699	21.1902	8.05342	25.3395	13.3182	6.90453	16.5975	0.586816	0.0374725	-0.76902	1.42629
IL-20	18.684	30.4488	43.8826	17.56	18.5235	20.5179	19.4931	11.5802	25.7672	27.4406	17.0674	20.5886	49.0625	20.0643	20.6515	22.5659	0.823941	0.410756	-0.279387	0.386416
IL-23	112.002	77.2238	206.275	78.8529	110.939	71.4494	244.562	220.873	95.0739	220.459	128.935	104.15	97.4125	94.0644	92.6652	111.806	1.11899	0.689513	0.162193	0.161458
IL-28	21.7956	29.5403	42.4719	27.8055	14.3176	21.0873	29.4396	25.9935	18.6288	16.0267	20.814	29.0156	14.8149	24.7537	19.6601	20.2689	0.698445	0.0204179	-0.517781	1.68999
IL-3	0.142977	0.234548	0.210436	0.226111	0.324422	NA	0.353553	0.815944	0.270862	NA	NA	NA	NA	NA	NA	NA	2.16784	0.112232	1.11626	0.949884
IL-4	0.226671	0.23468	0.356598	0.198713	0.25868	NA	0.448944	0.263446	0.513799	NA	NA	NA	NA	NA	NA	NA	1.46053	0.163808	0.546495	0.785664
IL-5	1.04604	0.761443	4.2555	3.18442	1.65928	NA	2.08633	0.374418	1.50386	NA	NA	NA	NA	NA	NA	NA	0.608159	0.362582	-0.71748	0.440594
IL-6	4.90398	15.267	70.6117	2.74436	4.5278	NA	NA	0.439527	4.62096	NA	NA	NA	NA	NA	NA	NA	0.136692	0.335298	-2.871	0.474569
IL-9	60.1804	109.911	105.401	78.5292	113.364	NA	124.59	165.5	86.9382	NA	NA	NA	NA	NA	NA	NA	1.38521	0.140742	0.470104	0.851577
KC	7.62173	15.7249	14.1472	7.73186	10.3037	NA	30.3177	43.4973	17.0833	NA	NA	NA	NA	NA	NA	NA	2.23771	0.117188	1.16202	0.931117
M-CSF	3.72457	7.41949	9.02084	2.73582	2.98909	NA	9.5619	10.3252	4.7796	NA	NA	NA	NA	NA	NA	NA	1.20764	0.62847	0.272191	0.201716
MCP-1	3.72457	7.41949	9.02084	2.73582	2.98909	NA	9.5619	10.3252	4.7796	NA	NA	NA	NA	NA	NA	NA	1.20764	0.62847	0.272191	0.201716
MDC	190.192	80.1198	260.028	59.7545	175.407	300.728	40.7867	22.9171	26.6952	18.9328	105.484	86.2061	160.6	141.04	75.2378	35.6469	0.672029	0.348335	-0.573404	0.458003
MIP-2	6.54521	27.971	27.1896	3.10033	8.10001	5.87991	31.0397	12.2608	19.3104	78.7084	32.3369	27.9169	28.5153	25.3977	11.9697	25.2939	1.57768	0.382831	0.657802	0.416993
MIP-3a	1.90362	4.33169	2.17766	2.02683	2.19453	1.61239	1.67015	2.28956	1.1112	2.69637	10.9845	6.1698	8.32522	15.714	2.07555	2.22547	1.82215	0.385288	0.865643	0.414214
OPG	128.08	64.0729	93.2827	104.369	1948.71	3490.26	1741.73	2570.05	1249.98	148.018	4153.29	4119.95	3753.92	2190.86	3269.87	1677.25	25.9223	0.00198994	4.69612	2.70116
OPN	2742.14	3759.92	7908.55	5233.54	2144.33	1750.87	3445.66	2927.11	2673.34	1731.43	3230.02	2106.06	3808.17	1962.68	1498.44	1695.3	0.491638	0.00376029	-1.02433	2.42478
P-selectin	1251.59	1191.45	572.51	221.577	2267.27	1231.1	3451.1	3915.46	3451.83	3234.65	2284.77	1574.76	2269.64	2340.98	2400.28	2996.7	3.23523	0.000909306	1.69387	3.04129
Pro-MMP-9	6785.78	7966.86	424.669	4375.7	1073.1	517.161	1420.15	867.359	1272.74	586.123	663.312	218.977	62792.1	10243.3	1311.69	9950.66	1.54992	0.772707	0.632192	0.111985
Prolactin	31.853	22.844	38.3102	25.6062	48.7976	30.4822	54.2842	32.0243	38.3413	135.532	38.0302	45.3633	40.6133	34.8795	29.1829	32.6971	1.57438	0.274029	0.654784	0.562203
RANTES	2.95565	4.89584	2.27978	2.04132	3.04395	NA	8.95548	10.2781	4.96768	NA	NA	NA	NA	NA	NA	NA	2.23824	0.0822852	1.16237	1.08468
Resistin	1518	710.984	51.7068	19.0247	1275.42	308.037	3213.11	4263.39	3490.23	3900.74	2130.61	2783.96	2170.03	2739.74	2467.7	3997.92	4.74565	0.00389954	2.24661	2.40899
SCF	20.2772	25.6138	80.7402	34.4496	24.9094	31.3375	55.0459	66.3332	28.3841	58.3539	23.7307	24.7391	60.1647	30.0531	22.228	24.5111	0.930776	0.810454	-0.103494	0.0912717
SDF-1a	35.5398	50.3107	36.3284	37.64	90.7204	42.9793	27.8467	36.1499	66.3443	82.1056	16.6323	11.7912	110.997	88.0609	14.6491	30.8718	1.29135	0.521451	0.368884	0.282786
TNFa	0.165202	0.206551	0.2185	0.375869	0.428501	NA	0.0217282	2.44265	4.2638	NA	NA	NA	NA	NA	NA	NA	7.40764	0.165782	2.88901	0.780462
TPO	108.648	93.1258	120.926	82.4712	129.818	74.1104	69.5814	65.1111	90.5706	124.833	172.706	122.424	81.4819	117.99	65.2358	80.0441	0.982225	0.920926	-0.0258742	0.0357755
VCAM-1	1919.12	1625.46	1465.37	491.936	6664.94	4590.43	3409.56	3868.2	4189.23	3221.53	6432.65	2568.51	8781.4	4692.14	6018.66	4622.98	3.57818	0.00168381	1.83923	2.77371
VEGF	15.1572	22.8785	106.848	34.2661	9.77993	10.172	77.8265	40.0174	19.6549	140.712	67.2194	60.2839	46.3701	40.6093	39.9874	31.8777	1.08757	0.858039	0.121103	0.0664931
VEGF-D	5.56993	20.2068	32.5208	25.7093	7.29774	14.3324	25.5063	11.1582	29.1901	48.3919	12.4573	12.0464	33.9789	25.7311	4.0221	29.8504	1.00771	0.982745	0.011078	0.00755915
