# Supplementary material for: CCL5 promotes breast cancer recurrence through macrophage recruitment in residual tumors
Source: eLife journal article supplement (doi:10.7554/elife.43653), 2019-04-15
Supplement: supp [file elife-43653-supp-v1.zip › elife_poa_e43653_Figure_6_source_data_1.xlsx]

## Sheet: Sheet1
Figure 6-source data 1
Entrez	Symbol	baseMean	log2FoldChange	lfcSE	stat	pvalue	padj
12550	CDH1	4861.08	-9.5605	0.229718	-41.6185	0	0
192897	ITGB4	3887.37	-9.55757	0.230076	-41.5409	0	0
19268	PTPRF	5146.99	-8.71921	0.154733	-56.3501	0	0
12822	COL18A1	7932.89	-7.19777	0.127608	-56.4054	0	0
11501	ADAM8	1804.89	-6.9035	0.144993	-47.6126	0	0
27428	SHROOM3	4354.62	-5.20251	0.0912031	-57.0431	0	0
56615	MGST1	1260.83	-4.6866	0.0928843	-50.4563	0	0
16480	JUP	5623.38	-3.36859	0.0746691	-45.1135	0	0
68682	SLC44A2	4098.37	-2.91863	0.0581895	-50.1573	0	0
19272	PTPRK	4117.81	-2.62432	0.0558987	-46.9477	0	0
235505	CD109	6642.82	2.85042	0.0620619	45.9287	0	0
13823	EPB41L3	3402.27	2.86322	0.0527611	54.2676	0	0
66180	P3H4	1456.83	5.63115	0.132703	42.4341	0	0
66854	TRIM35	2920.66	7.08021	0.16024	44.1849	0	0
14178	FGF7	4368.71	7.75119	0.192047	40.361	0	0
16949	LOXL1	3446.11	8.19439	0.209913	39.0371	0	0
78560	ADGRA2	2801.96	8.47452	0.220183	38.4885	0	0
17387	MMP14	7457.87	11.0462	0.286	38.6229	0	0
12843	COL1A2	15551.1	11.4138	0.219827	51.9219	0	0
17082	IL1RL1	47941.4	11.7731	0.148391	79.3384	0	0
12835	COL6A3	14314.2	12.0939	0.307687	39.3057	0	0
54403	SLC4A4	3452.73	-2.90393	0.0811481	-35.7856	1.84812e-280	1.20523e-277
108735	SFT2D2	1968.57	-4.33903	0.121518	-35.7067	3.10715e-279	1.93819e-276
67313	5730559C18Rik	623.477	-4.07644	0.115469	-35.3034	5.2022e-273	3.10983e-270
53322	NUCB2	1124.19	-2.32257	0.0664925	-34.9299	2.61909e-267	1.50304e-264
22329	VCAM1	796.766	4.65638	0.136491	34.115	4.41614e-255	2.43686e-252
319944	TAF2	3269.95	1.45385	0.0427352	34.02	1.12732e-253	5.99024e-251
71704	ARHGEF3	1383.02	-3.72599	0.109641	-33.9835	3.8995e-253	1.99808e-250
213742	Xist	16880.1	-13.0355	0.392475	-33.2135	6.88176e-242	3.40457e-239
269356	SLC4A11	982.902	-4.60576	0.139516	-33.0125	5.3789e-239	2.57237e-236
12737	CLDN1	3663.04	-7.75848	0.235222	-32.9837	1.39288e-238	6.44633e-236
16478	jund	3475.36	-2.21854	0.068174	-32.5423	2.69234e-232	1.20709e-229
70737	CGN	1455.82	-8.32512	0.256863	-32.4108	1.93669e-230	8.41989e-228
142980	TLR3	2005.52	-4.58732	0.144044	-31.8467	1.4643e-222	6.17894e-220
21857	TIMP1	12060.9	1.98507	0.0625171	31.7524	2.94444e-221	1.20697e-218
16456	F11R	2309.75	-6.6729	0.211924	-31.4872	1.30098e-217	5.18478e-215
107765	ANKRD1	3895.44	-5.52419	0.178157	-31.0074	4.28446e-211	1.66133e-208
20198	S100A4	12366.7	3.23249	0.104269	31.0014	5.16253e-211	1.94913e-208
110310	KRT7	10128.7	-12.4909	0.409548	-30.4993	2.66466e-204	9.80254e-202
103963	RPN1	10936.3	0.793805	0.026262	30.2264	1.06564e-200	3.82219e-198
12443	CCND1	41605.4	-1.10182	0.0365041	-30.1835	3.89719e-200	1.36373e-197
56431	DSTN	12235.7	-1.82942	0.0609036	-30.038	3.13433e-198	1.07067e-195
20204	PRRX2	1351.02	7.86458	0.262804	29.9256	9.13796e-197	3.04889e-194
13052	CXADR	1826.47	-2.95954	0.0990993	-29.8644	5.71078e-196	1.8621e-193
105732	fam83h	1526.76	-2.93121	0.100056	-29.2957	1.17614e-188	3.74979e-186
11529	ADH7	1806.27	2.90572	0.0998285	29.1071	2.9204e-186	9.10849e-184
243548	PRICKLE2	1321.72	8.31789	0.288671	28.8144	1.41652e-182	4.32401e-180
230752	EVA1B	588.942	4.38676	0.152739	28.7207	2.10666e-181	6.29671e-179
69581	RHOU	2332.99	-2.40681	0.0839713	-28.6623	1.12649e-180	3.2983e-178
353499	TMC4	1000.31	-6.18113	0.216995	-28.4852	1.78868e-178	5.13245e-176
13649	EGFR	864.616	-6.05985	0.212885	-28.4654	3.14251e-178	8.8403e-176
14314	FSTL1	10751.9	12.8515	0.452792	28.3829	3.29006e-177	9.07741e-175
14302	FRK	1341.6	-1.60314	0.0569318	-28.1589	1.86642e-174	5.05237e-172
234593	NDRG4	1425.38	-2.86365	0.102207	-28.0182	9.74044e-173	2.58789e-170
26434	PRND	627.842	-6.00166	0.214631	-27.9627	4.61414e-172	1.20362e-169
16819	LCN2	34254	-7.63099	0.274602	-27.7893	5.84082e-170	1.4964e-167
20843	STAG2	2094.49	-3.61306	0.130206	-27.7487	1.80457e-169	4.54213e-167
109222	RARRES1	647.658	7.19911	0.259646	27.7267	3.32928e-169	8.23537e-167
72599	PDIA5	633.708	2.57373	0.0929774	27.6812	1.17486e-168	2.85689e-166
17069	LY6E	17709.9	-3.42481	0.124015	-27.616	7.14432e-168	1.70833e-165
64143	RALB	3883.16	-1.24729	0.0454997	-27.4131	1.91569e-165	4.50564e-163
54161	COPG1	9057.1	0.822597	0.0300571	27.3678	6.63329e-165	1.53496e-162
11981	ATP9A	1767.86	-9.69101	0.354157	-27.3636	7.44326e-165	1.69505e-162
242620	DMRTA2	563.718	6.78406	0.248179	27.3354	1.61275e-164	3.61533e-162
12035	BCAT1	4564.15	6.30779	0.231325	27.2681	1.01282e-163	2.23552e-161
19088	PRKAR2B	3287.32	2.56723	0.0950533	27.0084	1.1785e-160	2.5618e-158
14230	FKBP10	3649.85	11.2926	0.419264	26.9343	8.70458e-160	1.86395e-157
233765	PLEKHA7	511.206	-5.06083	0.188167	-26.8954	2.48723e-159	5.2477e-157
100342	FAM46B	926.188	-5.05118	0.188242	-26.8335	1.31597e-158	2.73626e-156
14605	TSC22D3	908.524	-2.96105	0.110842	-26.7141	3.22622e-157	6.61237e-155
20354	SEMA4D	617.936	-7.12335	0.266658	-26.7134	3.28582e-157	6.63968e-155
12490	CD34	3666.31	7.38914	0.27668	26.7064	3.96565e-157	7.9021e-155
56401	P3H1	1200.51	2.46502	0.0923717	26.6859	6.86814e-157	1.34983e-154
226352	EPB41L5	576.617	-3.32233	0.12456	-26.6726	9.78712e-157	1.89751e-154
72507	DZIP1L	1068.23	8.77872	0.330157	26.5895	8.97761e-156	1.71736e-153
12808	COBL	837.636	-6.63226	0.249668	-26.5643	1.7564e-155	3.31567e-153
19414	RASA3	3496.7	1.51152	0.0574076	26.3296	8.80047e-153	1.63975e-150
246727	OAS3	331.34	-3.69542	0.140687	-26.2671	4.56443e-152	8.39563e-150
20334	SEC23A	3726.22	1.47699	0.0564975	26.1426	1.19603e-150	2.17207e-148
67701	WFDC2	5475.31	-8.3136	0.318342	-26.1153	2.44528e-150	4.38531e-148
16156	IL11	1382.86	7.67219	0.29519	25.9907	6.31149e-149	1.11791e-146
11651	AKT1	14240.8	0.582544	0.0224615	25.9352	2.67087e-148	4.67304e-146
19041	PPL	4581.5	-6.70053	0.258916	-25.8791	1.14369e-147	1.97692e-145
65963	TMEM176B	3838.41	-3.49173	0.135182	-25.8298	4.0993e-147	7.00151e-145
13661	EHF	1704.08	-7.44385	0.288347	-25.8156	5.92603e-147	1.00024e-144
21356	TAPBP	3924.33	-1.64881	0.063891	-25.8066	7.48324e-147	1.2484e-144
102098	ARHGEF18	1783.27	-1.23658	0.0481759	-25.668	2.65915e-145	4.38515e-143
12988	CSK	3128.13	1.16043	0.0453847	25.5687	3.40239e-144	5.54706e-142
78255	RALGPS2	665.879	-4.25748	0.166878	-25.5126	1.42814e-143	2.30219e-141
226419	DYRK3	741.027	-2.1291	0.084624	-25.1596	1.11015e-139	1.7697e-137
68671	PCYT2	763.258	-7.23602	0.290287	-24.9271	3.77911e-137	5.95812e-135
68628	FBXW9	857.553	-2.06323	0.0828565	-24.9013	7.21089e-137	1.12451e-134
13866	ERBB2	8968.38	-3.3475	0.13483	-24.8276	4.51025e-136	6.9579e-134
18822	PLOD1	1602.41	1.59844	0.0645792	24.7517	2.97283e-135	4.53737e-133
23876	FBLN5	2397.39	4.43035	0.179003	24.7501	3.09338e-135	4.67166e-133
18104	NQO1	7086.87	5.51462	0.223345	24.691	1.33588e-134	1.99645e-132
17158	MAN2A1	9062.27	1.8066	0.0732289	24.6706	2.2146e-134	3.27555e-132
71461	PTK7	2255.41	-4.32469	0.175607	-24.6271	6.47592e-134	9.48061e-132
18024	NFE2L2	5035.67	0.991714	0.0412419	24.0463	9.12622e-128	1.32257e-125
71913	TMEM79	682.583	-5.4917	0.228821	-23.9999	2.78502e-127	3.99567e-125
19285	PTRF	12085.3	4.69238	0.196382	23.8941	3.52557e-126	5.00805e-124
12725	CLCN3	1749.9	-2.25757	0.0946328	-23.8561	8.76e-126	1.23215e-123
239554	FOXRED2	1803.85	-5.63238	0.23636	-23.8297	1.64607e-125	2.29284e-123
109050	FAM212B	544.166	-3.15453	0.132434	-23.8196	2.0924e-125	2.88651e-123
26415	mapk13	721.656	-8.23455	0.346622	-23.7566	9.39867e-125	1.28422e-122
12905	CRADD	304.747	-2.59256	0.109247	-23.7312	1.71931e-124	2.32707e-122
110532	ADARB1	539.92	-2.02434	0.085337	-23.7217	2.15549e-124	2.89017e-122
216148	SHC2	504.355	7.36539	0.310647	23.7098	2.85551e-124	3.79334e-122
18414	OSMR	1742.61	2.29944	0.0974083	23.6062	3.32522e-123	4.37678e-121
83397	AKAP12	9504.52	-4.81529	0.204761	-23.5167	2.75375e-122	3.59164e-120
12288	CACNA1C	795.94	7.90978	0.337075	23.4659	9.09461e-122	1.1755e-119
67169	Nradd	498.737	2.24139	0.0957233	23.4154	2.98153e-121	3.81929e-119
12695	PATJ	847.699	-8.466	0.361847	-23.3967	4.62214e-121	5.86848e-119
18693	PICK1	510.814	-1.9897	0.0855445	-23.2592	1.14851e-119	1.44541e-117
97440	B3GNT9	245.251	4.6799	0.201685	23.204	4.15108e-119	5.17874e-117
211770	TRIB1	2180.21	1.92849	0.0836308	23.0596	1.17855e-117	1.45765e-115
66629	GOLPH3	6192.77	0.834196	0.0362822	22.9919	5.62187e-117	6.89376e-115
235633	ALS2CL	1221.35	-9.54336	0.417199	-22.8748	8.27131e-116	1.00566e-113
347722	AGAP1	2413.04	-1.40832	0.0617653	-22.8011	4.47557e-115	5.39589e-113
21804	TGFB1I1	671.194	6.15706	0.270064	22.7985	4.74648e-115	5.67482e-113
20732	SPINT1	799.115	-7.62474	0.335095	-22.7539	1.31149e-114	1.55503e-112
83675	BICC1	509.358	7.70565	0.339503	22.6969	4.80801e-114	5.65414e-112
212285	ARAP2	1170.22	-3.17413	0.139983	-22.6751	7.89739e-114	9.21169e-112
54710	HS3ST3B1	441.415	-6.91114	0.30484	-22.6714	8.58909e-114	9.93772e-112
106766	STAP2	377.277	-5.22139	0.230896	-22.6136	3.18398e-113	3.65445e-111
252973	GRHL2	930.095	-6.82196	0.301867	-22.5992	4.40889e-113	5.02019e-111
12931	CRLF1	3541.66	4.8241	0.213525	22.5926	5.12077e-113	5.78486e-111
18611	Pea15a	5349.26	-1.65858	0.0734183	-22.5908	5.33931e-113	5.98462e-111
13383	DLG1	4934.33	-1.62576	0.0720533	-22.5634	9.9306e-113	1.10445e-110
109332	CDCP1	914.111	-8.73505	0.387711	-22.5298	2.11789e-112	2.33733e-110
228413	PRRG4	2963.21	-5.77729	0.256863	-22.4917	5.00895e-112	5.48576e-110
245857	SSH3	722.491	-5.54083	0.246946	-22.4375	1.69689e-111	1.84434e-109
99470	MAGI3	1000.08	-1.956	0.0873142	-22.4019	3.77391e-111	4.071e-109
213948	ATG9B	1688.34	-5.95125	0.266181	-22.3579	1.01253e-110	1.08409e-108
227358	FAM132B	1023.91	-6.48648	0.290566	-22.3236	2.17916e-110	2.31589e-108
243219	2900026A02Rik	2610.16	-2.26553	0.101765	-22.2624	8.56153e-110	9.03178e-108
319352	PIANP	415.279	6.46181	0.290686	22.2295	1.7792e-109	1.86322e-107
22152	TUBB3	355.423	5.79787	0.260948	22.2185	2.2754e-109	2.36559e-107
17196	MBP	630.351	-7.58771	0.342622	-22.146	1.13993e-108	1.17658e-106
18514	PBX1	5560.18	-1.12284	0.0507061	-22.1441	1.18934e-108	1.21882e-106
242785	KLHL21	4588.79	1.31327	0.0595424	22.056	8.35941e-108	8.50584e-106
80285	PARP9	675.698	-1.79251	0.0813313	-22.0396	1.20238e-107	1.21482e-105
330938	DIXDC1	602.265	2.6826	0.121727	22.0379	1.24889e-107	1.253e-105
330814	ADGRL1	1423.88	3.38447	0.153828	22.0016	2.77818e-107	2.76796e-105
277414	Trp53i11	472.287	-6.32794	0.288221	-21.9552	7.72801e-107	7.64647e-105
16476	JUN	3921.02	1.81965	0.083082	21.9018	2.49518e-106	2.45194e-104
211945	PLEKHH1	254.919	-3.73537	0.170973	-21.8477	8.17619e-106	7.97985e-104
72754	ARHGEF10L	776.114	-3.76399	0.172446	-21.8271	1.28447e-105	1.24515e-103
70417	MEGF10	1723.66	-8.82366	0.405062	-21.7835	3.32634e-105	3.20289e-103
208943	MYO5C	998.153	-9.25077	0.425358	-21.7482	7.18274e-105	6.87005e-103
22439	XK	242.874	-4.25556	0.195982	-21.714	1.51151e-104	1.43614e-102
17937	nab2	2436.43	2.06782	0.0953271	21.6918	2.45236e-104	2.31473e-102
207683	igsf11	996.127	-8.08718	0.373269	-21.6658	4.31044e-104	4.04196e-102
117606	BOC	372.266	2.16467	0.100159	21.6123	1.37696e-103	1.28281e-101
216233	SOCS2	1661.22	-4.56643	0.212663	-21.4726	2.80955e-102	2.60056e-100
629378	DACT3	306.875	4.11107	0.192376	21.37	2.54182e-101	2.33766e-99
66058	TMEM176A	1828.8	-3.90054	0.183051	-21.3085	9.46805e-101	8.65211e-99
97031	TPRN	1103.52	-1.36818	0.0644065	-21.2429	3.83125e-100	3.47892e-98
22352	VIM	86453.4	1.43159	0.0675857	21.1819	1.40382e-99	1.26671e-97
12266	C3	7835.68	-3.05163	0.144232	-21.1579	2.33596e-99	2.09463e-97
21802	TGFA	1081.29	-8.7466	0.414109	-21.1215	5.04934e-99	4.49956e-97
13024	Ctla2a	783.451	-6.73427	0.32003	-21.0426	2.6729e-98	2.36716e-96
228876	Zfp334	534.95	2.13477	0.101795	20.9713	1.20052e-97	1.05668e-95
13196	ASAP1	9857.54	1.63899	0.0783609	20.9159	3.83449e-97	3.35448e-95
76509	PLET1	354.797	-7.20526	0.34477	-20.8987	5.49838e-97	4.78092e-95
71960	MYH14	831.153	-9.22968	0.441778	-20.8921	6.31827e-97	5.46074e-95
75841	RNF139	1737.64	0.988288	0.0473718	20.8624	1.17685e-96	1.01104e-94
330662	DOCK1	2448.4	2.33542	0.111979	20.8559	1.34805e-96	1.15122e-94
229474	FHDC1	1312.07	-1.9894	0.0957348	-20.7803	6.51944e-96	5.53458e-94
224833	AI661453	611.442	-6.3159	0.304482	-20.7431	1.41393e-95	1.19327e-93
94346	TMEM40	251.078	-6.30383	0.30396	-20.739	1.54098e-95	1.29289e-93
223978	CPPED1	1451.53	-1.15044	0.0555381	-20.7144	2.56678e-95	2.14103e-93
102626	MAPKAPK3	261.861	-3.31266	0.160346	-20.6594	8.04023e-95	6.66781e-93
21366	SLC6A6	16623.7	1.08599	0.0525881	20.6509	9.57832e-95	7.89771e-93
14583	GFPT1	3776.4	0.973355	0.0473416	20.5603	6.23008e-94	5.1076e-92
70472	ATAD2	9239.99	1.11724	0.054426	20.5277	1.21833e-93	9.93143e-92
14026	EVL	2539.33	1.3769	0.0671975	20.4903	2.62748e-93	2.12974e-91
54648	CCDC120	494.579	-1.96996	0.0961534	-20.4877	2.77047e-93	2.23303e-91
13433	DNMT1	10489	0.785534	0.0383505	20.483	3.05114e-93	2.44551e-91
230779	SERINC2	1294.8	-8.73422	0.427281	-20.4414	7.16304e-93	5.70934e-91
13392	DLX2	761.705	9.15555	0.448741	20.4027	1.58107e-92	1.25324e-90
18195	NSF	2352.26	0.838338	0.041331	20.2835	1.79828e-91	1.41758e-89
59125	NEK7	5248.45	-1.07069	0.0528266	-20.2681	2.4606e-91	1.92909e-89
81535	sgpp1	2407.52	1.49516	0.0738569	20.244	4.01293e-91	3.12899e-89
53868	RAB25	297.394	-6.66994	0.329613	-20.2357	4.75023e-91	3.68386e-89
71973	RBPMS2	702.537	4.65582	0.231652	20.0983	7.6356e-90	5.88968e-88
100303738	D030025P21Rik	577.04	1.54527	0.0769335	20.0858	9.83026e-90	7.54196e-88
320827	C530008M17Rik	457.098	7.3418	0.365549	20.0843	1.01189e-89	7.72214e-88
81840	SORCS2	282.321	-4.5629	0.228344	-19.9826	7.80939e-89	5.92811e-87
12390	CAV2	2871.36	-1.51334	0.0758161	-19.9607	1.21071e-88	9.12493e-87
12286	CACNA1A	234.367	3.06523	0.153565	19.9605	1.21479e-88	9.12493e-87
234214	SORBS2	9480.43	-10.1194	0.508293	-19.9086	3.42712e-88	2.56088e-86
11518	ADD1	5006.83	-1.00692	0.050657	-19.8772	6.41488e-88	4.76862e-86
232943	KLC3	372.569	-3.77904	0.190764	-19.81	2.43947e-87	1.80408e-85
17075	EPCAM	2620.71	-11.3476	0.573985	-19.7698	5.41544e-87	3.98438e-85
69698	SLC52A3	183.444	-5.26508	0.267374	-19.6918	2.5343e-86	1.85508e-84
67980	GNPDA2	454.981	-1.95556	0.0995757	-19.6389	7.19097e-86	5.237e-84
240752	PIK3C2B	191.452	-3.46781	0.176687	-19.6269	9.11486e-86	6.60459e-84
13849	EPHX1	3092.39	-2.46603	0.125695	-19.6192	1.06086e-85	7.64833e-84
73341	ARHGEF6	194.821	-5.47862	0.279901	-19.5734	2.60526e-85	1.86889e-83
18640	PFKFB2	1962.83	-2.03222	0.103954	-19.5492	4.1915e-85	2.99181e-83
65113	NDFIP1	2337.12	-0.847023	0.0433801	-19.5256	6.65325e-85	4.72546e-83
20743	SPTBN2	522.864	-5.7808	0.296397	-19.5036	1.0234e-84	7.23289e-83
69697	CAMSAP3	240.231	-5.47651	0.28109	-19.4831	1.52618e-84	1.07334e-82
93672	IL24	315.575	-6.51713	0.334592	-19.4778	1.69359e-84	1.18526e-82
12520	CD81	5805.97	-1.16407	0.0599234	-19.426	4.65421e-84	3.24145e-82
79555	BC005537	8107.87	0.738134	0.0380202	19.4142	5.84946e-84	4.05421e-82
16865	EIF2D	1703.02	-1.08817	0.0560865	-19.4017	7.46752e-84	5.15079e-82
68794	FLNC	10505.8	2.23135	0.11524	19.3626	1.59522e-83	1.09505e-81
18645	PFN2	851.359	3.46637	0.179595	19.3011	5.26088e-83	3.59418e-81
213573	cracr2b	269.774	-6.66234	0.346313	-19.2379	1.78323e-82	1.21251e-80
20733	SPINT2	2627.85	-11.7639	0.611862	-19.2264	2.22347e-82	1.50472e-80
14007	CELF2	1655.24	-1.45399	0.0757933	-19.1837	5.0689e-82	3.41425e-80
14924	MAGI1	1126.87	-1.53395	0.0799893	-19.177	5.76127e-82	3.86247e-80
240832	TOR1AIP2	6052.33	-0.572015	0.0298366	-19.1716	6.39396e-82	4.26671e-80
13732	EMP3	3924.38	3.20535	0.167905	19.0902	3.04437e-81	2.02211e-79
227960	GCA	226.503	-6.27643	0.328943	-19.0806	3.66173e-81	2.42096e-79
21873	TJP2	3473.67	-2.32328	0.121852	-19.0664	4.80508e-81	3.16232e-79
245945	RBM47	498.573	-8.24908	0.433364	-19.035	8.74956e-81	5.73196e-79
20442	ST3GAL1	2176.47	1.61413	0.0849567	18.9994	1.72485e-80	1.12484e-78
18557	CDK18	346.9	-2.26091	0.119055	-18.9904	2.04595e-80	1.3282e-78
67226	TMEM19	1386.21	-1.2783	0.0673201	-18.9883	2.12942e-80	1.37616e-78
72297	B3GNT3	287.577	-4.41798	0.232902	-18.9693	3.06031e-80	1.96889e-78
13867	ERBB3	549.457	-8.18952	0.432447	-18.9376	5.58927e-80	3.57988e-78
216549	AFTPH	1809.98	-0.824247	0.0436042	-18.9029	1.07924e-79	6.88169e-78
77411	ESRP2	318.476	-7.49282	0.396805	-18.8829	1.57819e-79	1.00187e-77
76073	PCGF5	480.817	-2.03505	0.108261	-18.7977	7.89145e-79	4.9876e-77
27205	PODXL	935.568	-6.78424	0.362263	-18.7274	2.95944e-78	1.86224e-76
216225	SLC5A8	243.589	-5.88974	0.315128	-18.69	5.97285e-78	3.74203e-76
100340	SMPDL3B	183.25	-2.65756	0.142291	-18.677	7.62177e-78	4.75433e-76
13591	EBF1	470.107	5.24049	0.281542	18.6136	2.49504e-77	1.54963e-75
23983	PCBP1	14347.4	0.950304	0.05108	18.6042	2.96861e-77	1.83581e-75
14797	AES	7464.49	-1.07141	0.0577374	-18.5566	7.21434e-77	4.44224e-75
435684	SHF	877.73	-1.9217	0.103562	-18.5559	7.30345e-77	4.47789e-75
22409	WNT10A	780.636	-6.4376	0.34705	-18.5495	8.23839e-77	5.02962e-75
69815	KRTCAP3	175.046	-5.01051	0.27113	-18.4801	2.98404e-76	1.81407e-74
213326	SCYL2	1602.3	-0.940413	0.0509666	-18.4516	5.06674e-76	3.06719e-74
67154	MTDH	9744.44	0.845335	0.0459208	18.4085	1.12238e-75	6.76588e-74
68859	SMIM1	226.329	-4.33392	0.235475	-18.405	1.19728e-75	7.1872e-74
12609	CEBPD	1670.89	2.87671	0.156456	18.3867	1.6781e-75	1.00315e-73
20346	SEMA3A	1343.23	4.06049	0.221278	18.3501	3.29238e-75	1.95999e-73
50798	GNE	1121.91	-1.71884	0.093814	-18.3218	5.54713e-75	3.28862e-73
21813	TGFBR2	6010.78	-0.73899	0.0404342	-18.2764	1.27602e-74	7.53375e-73
12816	COL12A1	12375.1	3.02955	0.165983	18.2522	1.98773e-74	1.16877e-72
66952	2310030G06Rik	273.198	-5.00842	0.275115	-18.2048	4.72514e-74	2.767e-72
20514	slc1a5	2598.61	3.06427	0.168437	18.1923	5.93801e-74	3.46312e-72
66102	CXCL16	3110.62	-7.30209	0.402434	-18.1448	1.4114e-73	8.19814e-72
11877	arvcf	291.556	-2.58522	0.14257	-18.1329	1.75205e-73	1.01358e-71
108037	SHMT2	7845.35	0.847523	0.0467721	18.1203	2.2057e-73	1.27089e-71
12227	BTG2	410.166	-2.68286	0.148354	-18.0842	4.244e-73	2.43554e-71
12450	CCNG1	12694	-1.53567	0.0849587	-18.0754	4.97639e-73	2.84447e-71
320487	HEATR5A	3431.69	1.44652	0.0802536	18.0244	1.25339e-72	7.13588e-71
93842	IGSF9	746.858	-7.71954	0.429296	-17.9819	2.70275e-72	1.53266e-70
223499	DCAF13	2889.99	0.950252	0.0530089	17.9263	7.35262e-72	4.15307e-70
17974	NCK2	672.816	-1.8719	0.104478	-17.9166	8.74987e-72	4.92292e-70
50490	NOX4	849.504	-4.41287	0.247312	-17.8434	3.25447e-71	1.8239e-69
11745	ANXA3	16571.3	-1.05508	0.0591879	-17.826	4.44053e-71	2.47892e-69
13382	DLD	4740.96	0.573857	0.0322252	17.8077	6.1576e-71	3.42415e-69
110796	TSHZ1	3703.99	1.81967	0.102202	17.8047	6.50245e-71	3.60196e-69
17207	MCF2L	168.546	2.79675	0.157185	17.7927	8.04421e-71	4.43886e-69
14027	EVPL	150.293	-5.13898	0.289306	-17.7631	1.36443e-70	7.50016e-69
353211	PRUNE2	3769.12	-5.29934	0.298612	-17.7466	1.83206e-70	1.00323e-68
235611	PLXNB1	952.474	-4.91011	0.276851	-17.7355	2.22932e-70	1.21612e-68
106014	FAM19A5	583.016	-7.91544	0.447303	-17.6959	4.50845e-70	2.4501e-68
67451	PKP2	754.078	-2.40101	0.135917	-17.6653	7.76614e-70	4.20456e-68
56047	MSLN	8683.33	-8.7499	0.495674	-17.6525	9.72909e-70	5.24749e-68
14339	AKTIP	825.362	-1.45005	0.0821656	-17.6479	1.05648e-69	5.67691e-68
12337	CAPN5	748.13	-3.81291	0.216263	-17.6309	1.42652e-69	7.63667e-68
75605	KDM5B	1354.96	-1.33233	0.0758891	-17.5563	5.32483e-69	2.83998e-67
270084	LPCAT2	199.529	-6.62153	0.377639	-17.534	7.88336e-69	4.18899e-67
320817	ATAD2B	1198.72	1.06338	0.0607801	17.4955	1.5504e-68	8.20794e-67
66195	Lce1g	1345.16	-8.07929	0.462607	-17.4647	2.66023e-68	1.40318e-66
319530	Zfp750	275.688	-7.28123	0.417773	-17.4287	4.99996e-68	2.62764e-66
20657	SOD3	3077.26	3.07023	0.176816	17.364	1.54462e-67	8.08783e-66
240505	CDC42BPG	2765.37	-5.48441	0.315911	-17.3606	1.64029e-67	8.55753e-66
72736	TMX1	4146.56	0.789248	0.0455323	17.3338	2.61454e-67	1.35909e-65
52521	Zfp622	2598.01	0.981678	0.0566545	17.3275	2.91985e-67	1.51232e-65
29816	HIP1R	2827.45	-1.24197	0.0718972	-17.2742	7.3601e-67	3.79839e-65
55960	EBAG9	745.892	1.04237	0.0606472	17.1874	3.29767e-66	1.69576e-64
12236	BUB1B	4520.57	1.04593	0.0608772	17.1809	3.68874e-66	1.89008e-64
74105	GGA2	1596.65	1.01866	0.0593107	17.175	4.08732e-66	2.08686e-64
12111	BGN	6053.62	13.6001	0.792125	17.1691	4.52413e-66	2.30169e-64
18704	PIK3C2A	9447.16	-1.48861	0.0867146	-17.1668	4.7091e-66	2.38733e-64
71740	NECTIN4	172.764	-6.07413	0.35403	-17.1571	5.56107e-66	2.80932e-64
104884	TDP1	766.623	1.20106	0.0701119	17.1306	8.77217e-66	4.41594e-64
224860	PLCL2	248.297	6.25655	0.365279	17.1282	9.14921e-66	4.58964e-64
329540	NOL4L	446.614	-5.71344	0.334075	-17.1023	1.42673e-65	7.13218e-64
547253	PARP14	475.138	-1.98108	0.115845	-17.1011	1.45746e-65	7.2605e-64
245128	AU018091	151.454	-5.50584	0.321992	-17.0993	1.50246e-65	7.45875e-64
16373	IRX3	1737.75	-2.07649	0.121486	-17.0924	1.69029e-65	8.36227e-64
17390	MMP2	1052.98	7.16714	0.419642	17.0792	2.12102e-65	1.04572e-63
55925	syt8	497.875	-7.18179	0.420793	-17.0673	2.60037e-65	1.27766e-63
73182	PEAR1	812.324	7.05589	0.413584	17.0604	2.9273e-65	1.43338e-63
53885	nphp1	541.342	-1.42833	0.0838346	-17.0375	4.32955e-65	2.11279e-63
105844	CARD10	632.615	-5.2156	0.306179	-17.0345	4.55766e-65	2.21657e-63
104886	RAB15	2067.9	-4.09765	0.240613	-17.03	4.92007e-65	2.38474e-63
18772	pkp1	3576.49	-12.4735	0.732644	-17.0253	5.32741e-65	2.57348e-63
211652	WWC1	1893.15	-4.02955	0.236724	-17.0222	5.62342e-65	2.70735e-63
18717	PIP5K1C	5818.02	-1.28016	0.075403	-16.9775	1.20486e-64	5.7813e-63
404634	H2AFY2	629.619	1.91761	0.112965	16.9752	1.25357e-64	5.99497e-63
53886	CDKL2	646.143	-2.12968	0.125744	-16.9367	2.41458e-64	1.1509e-62
71889	EPN3	355.357	-8.28989	0.49006	-16.9161	3.42428e-64	1.62676e-62
320706	SOGA1	2845.39	1.3374	0.0790804	16.9119	3.67968e-64	1.74232e-62
100862012	Gm21399	3567.87	1.71638	0.101524	16.9061	4.05522e-64	1.91382e-62
66260	TMEM54	275.369	-7.5071	0.444093	-16.9044	4.17852e-64	1.96555e-62
12575	CDKN1A	5630.17	-1.4998	0.0887451	-16.9001	4.48887e-64	2.10464e-62
16782	LAMC2	5234.81	-2.33586	0.138312	-16.8883	5.48479e-64	2.5632e-62
27401	SKP2	1767.49	2.03332	0.120595	16.8608	8.74604e-64	4.07401e-62
13506	DSC2	405.136	-7.94007	0.471043	-16.8564	9.42103e-64	4.37422e-62
27280	PHLDA3	4323.83	-0.852061	0.050565	-16.8508	1.03496e-63	4.78985e-62
70110	IFI35	458.427	-1.85616	0.110216	-16.841	1.22056e-63	5.63065e-62
212439	AA986860	249.664	-3.67547	0.218339	-16.8338	1.38039e-63	6.3476e-62
70564	FAM213A	502.206	-5.61676	0.334919	-16.7705	4.01094e-63	1.8385e-61
15275	HK1	7514.95	-1.65619	0.0988021	-16.7627	4.57269e-63	2.08931e-61
12654	Chil1	292.315	-5.95134	0.355399	-16.7455	6.10779e-63	2.78186e-61
18016	NF2	4008	-0.734057	0.0438921	-16.7241	8.74333e-63	3.96964e-61
72565	UACA	6295.81	2.18338	0.130608	16.7171	9.83886e-63	4.45294e-61
73690	GLIPR1	999.569	6.70815	0.401553	16.7055	1.19525e-62	5.39255e-61
16012	IGFBP6	773.286	9.83565	0.589333	16.6895	1.56388e-62	7.03353e-61
16780	LAMB3	2443.31	-5.6618	0.339314	-16.6861	1.65555e-62	7.42256e-61
69551	2310022B05Rik	6062.45	1.48356	0.0889352	16.6813	1.7918e-62	8.00839e-61
20502	SLC16A2	854.33	-9.92764	0.595188	-16.6798	1.83701e-62	8.18496e-61
77963	HOOK1	457.002	-8.65702	0.520478	-16.6328	4.0312e-62	1.79058e-60
18647	CDK14	1468.24	1.02101	0.0614681	16.6105	5.85132e-62	2.59102e-60
66898	BAIAP2L1	712.13	-9.00458	0.542163	-16.6086	6.03526e-62	2.66424e-60
100737	DCUN1D4	745.38	-1.14653	0.0693079	-16.5426	1.80976e-61	7.96461e-60
105005	FAM84A	228.236	-6.22694	0.376752	-16.528	2.30761e-61	1.01246e-59
212980	SLC45A3	180.494	-3.36127	0.203826	-16.4909	4.26585e-61	1.86592e-59
320924	CCBE1	6017.53	-6.45627	0.391771	-16.4797	5.13569e-61	2.23957e-59
83965	ENPP5	463.095	-8.02835	0.487211	-16.4782	5.26424e-61	2.28867e-59
108099	PRKAG2	387.49	-2.55526	0.155199	-16.4644	6.6065e-61	2.86355e-59
21384	TBX15	354.155	8.50688	0.517168	16.449	8.52824e-61	3.68538e-59
20454	ST3GAL5	1779.03	-1.24764	0.0759988	-16.4166	1.45498e-60	6.26864e-59
353342	Peg13	625.168	1.86676	0.113779	16.4069	1.70726e-60	7.33357e-59
19106	eif2ak2	1553.87	-0.809441	0.0493731	-16.3944	2.09796e-60	8.98492e-59
76041	CCDC125	117.194	-4.96512	0.303027	-16.3851	2.44527e-60	1.04411e-58
76295	ATP11B	2065.78	-0.836143	0.0511314	-16.3528	4.15317e-60	1.76812e-58
215113	SLC43A2	501.42	-2.90122	0.177864	-16.3114	8.18366e-60	3.4737e-58
105787	prkaa1	4426.2	1.15959	0.0711153	16.3057	8.98651e-60	3.80323e-58
14257	FLT4	174.259	-3.671	0.225398	-16.2868	1.22527e-59	5.17028e-58
14251	FLOT1	1098.49	-2.2147	0.136342	-16.2437	2.47377e-59	1.0408e-57
14972	H2-K1	7310.3	-1.47574	0.0909306	-16.2293	3.13262e-59	1.31415e-57
97775	D930048N14Rik	116.478	-3.08113	0.190201	-16.1993	5.10113e-59	2.1337e-57
26563	ROR1	482.549	-2.63357	0.162731	-16.1836	6.58799e-59	2.74761e-57
54637	PRAF2	645.613	1.11767	0.0690674	16.1824	6.71781e-59	2.79364e-57
68734	SMEK1	4207.55	0.806782	0.049862	16.1803	6.94487e-59	2.87971e-57
19271	PTPRJ	822.498	-2.12044	0.131249	-16.1559	1.03213e-58	4.26744e-57
16878	LIF	2062.31	-2.05075	0.126987	-16.1493	1.14847e-58	4.73479e-57
19707	REPS1	2629.9	0.74927	0.0464351	16.1358	1.42853e-58	5.87253e-57
103534	MGAT4B	5049.6	-1.03164	0.0639576	-16.1301	1.56749e-58	6.42538e-57
22249	UNC13B	275.71	-6.58312	0.408728	-16.1064	2.30218e-58	9.41007e-57
12484	Cd24a	9536.78	-6.67711	0.414783	-16.0978	2.64244e-58	1.07702e-56
20350	SEMA3F	1145.69	-2.03486	0.126408	-16.0975	2.65614e-58	1.07954e-56
108705	PTTG1IP	7473.99	-1.82481	0.113595	-16.0642	4.54813e-58	1.84328e-56
54324	ARHGEF5	3005.56	-3.94193	0.246124	-16.0161	9.86963e-58	3.98872e-56
108837	IBTK	2187.72	0.985227	0.0615837	15.9982	1.31545e-57	5.30134e-56
16668	KRT18	9523.76	-16.6474	1.04137	-15.986	1.59913e-57	6.42652e-56
360013	MYO18A	2720.63	-1.45382	0.09099	-15.9778	1.82368e-57	7.30849e-56
27410	ABCA3	2058.13	-1.41785	0.0887695	-15.9723	1.99415e-57	7.96939e-56
15170	PTPN6	146.612	-5.29114	0.331568	-15.958	2.50792e-57	9.99475e-56
216961	CORO6	226.11	-3.59586	0.225352	-15.9567	2.56097e-57	1.01779e-55
67622	MXRA7	322.35	8.20222	0.514539	15.9409	3.29497e-57	1.30588e-55
13139	DGKA	428.771	-2.69336	0.169256	-15.9129	5.15639e-57	2.03798e-55
11911	ATF4	7407.68	0.668299	0.0420503	15.8929	7.10016e-57	2.79852e-55
105387	Akr1c14	282.827	4.45305	0.280464	15.8774	9.08231e-57	3.56997e-55
83814	NEDD4L	2556.28	1.12821	0.07109	15.8702	1.01975e-56	3.99735e-55
214230	PAK6	284.713	-7.81873	0.49305	-15.8579	1.24008e-56	4.8478e-55
28035	USP39	3286.81	0.780308	0.0492087	15.8571	1.25505e-56	4.89299e-55
16196	IL7	123.893	-5.39213	0.340456	-15.8379	1.70325e-56	6.62236e-55
18605	ENPP1	941.272	-3.66581	0.231478	-15.8365	1.74213e-56	6.75523e-55
30963	HACD1	254.247	2.17636	0.137501	15.828	1.99511e-56	7.71531e-55
59093	PCBP3	236.644	-7.40857	0.468827	-15.8024	2.99666e-56	1.15573e-54
231207	CPEB2	1127.08	-1.26395	0.0801032	-15.779	4.33778e-56	1.66848e-54
56468	SOCS5	3707.5	0.613105	0.038966	15.7343	8.79582e-56	3.37416e-54
107371	EXOC6	459.564	-1.81866	0.115737	-15.7138	1.2171e-55	4.65646e-54
17260	MEF2C	406.874	3.98508	0.254	15.6893	1.78983e-55	6.82943e-54
545975	CERS3	302.834	-8.063	0.514104	-15.6836	1.95907e-55	7.45538e-54
64817	SVEP1	521.067	9.07342	0.578607	15.6815	2.0244e-55	7.68361e-54
12399	RUNX3	368.04	7.6377	0.487668	15.6617	2.76561e-55	1.04692e-53
319482	9530053A07Rik	110.189	-4.53731	0.29002	-15.6448	3.60547e-55	1.36125e-53
12475	CD14	957.4	-3.38144	0.216363	-15.6285	4.65275e-55	1.75205e-53
14000	DROSHA	4841.66	1.10582	0.0708061	15.6176	5.52522e-55	2.07514e-53
26564	ROR2	490.059	9.39239	0.601451	15.6162	5.64656e-55	2.11518e-53
24055	SH3BP2	1057.75	-3.55006	0.227365	-15.6139	5.85213e-55	2.18647e-53
53421	SEC61A1	12219.7	0.786406	0.0504081	15.6008	7.18808e-55	2.67863e-53
108153	ADAMTS7	751.994	2.84586	0.182427	15.6	7.27552e-55	2.70419e-53
13010	CST3	6522.96	1.14249	0.0732662	15.5937	8.02879e-55	2.97646e-53
22240	DPYSL3	1190.71	6.54936	0.420634	15.5702	1.16015e-54	4.28986e-53
24110	USP18	133.393	-4.60307	0.296122	-15.5445	1.73413e-54	6.39577e-53
71145	SCARA5	820.166	-5.07246	0.326463	-15.5376	1.9297e-54	7.09882e-53
233977	ppfia1	3574.22	-0.669678	0.0431631	-15.5151	2.74421e-54	1.00693e-52
17300	FOXC1	2326.49	-0.811516	0.0524686	-15.4667	5.82114e-54	2.13051e-52
13844	EPHB2	863.973	4.31472	0.279514	15.4365	9.30545e-54	3.39708e-52
50493	TXNRD1	29396.7	1.29422	0.0838457	15.4358	9.4034e-54	3.42413e-52
26951	ZW10	1362.92	0.826955	0.0535865	15.4322	9.94796e-54	3.61325e-52
14241	FOXL1	646.89	10.0592	0.652713	15.4113	1.37331e-53	4.97546e-52
12842	COL1A1	9088.13	8.57999	0.556826	15.4087	1.42974e-53	5.16686e-52
14600	GHR	1416.24	1.77251	0.115286	15.3749	2.414e-53	8.70193e-52
16691	KRT8	6141.35	-13.9891	0.910462	-15.3649	2.81667e-53	1.0128e-51
96957	TMEM62	286.571	-2.75302	0.179319	-15.3526	3.4002e-53	1.21957e-51
192678	RASSF3	2081.96	-2.565	0.16717	-15.3437	3.90421e-53	1.39685e-51
382620	TMED8	1844.5	1.22077	0.0795641	15.3433	3.92949e-53	1.4024e-51
244654	MTSS1L	389.492	1.42532	0.0929327	15.3372	4.31652e-53	1.5367e-51
215280	WIPF1	1644.1	3.12869	0.204005	15.3364	4.36795e-53	1.55116e-51
15488	HSD17B4	2362.82	-0.92613	0.060409	-15.331	4.74589e-53	1.68122e-51
224024	SCARF2	433.682	8.34619	0.544699	15.3226	5.40237e-53	1.90906e-51
16182	IL18R1	522.615	-7.30377	0.476723	-15.3208	5.55633e-53	1.95864e-51
27008	MICALL1	3846.75	-0.789727	0.051578	-15.3113	6.424e-53	2.25895e-51
320705	BEND6	196.664	2.64214	0.172629	15.3053	7.04383e-53	2.47085e-51
66724	TAB3	958.651	-1.17121	0.0765996	-15.29	8.91499e-53	3.11959e-51
108148	GALNT2	5550.48	-0.981426	0.0642777	-15.2685	1.23919e-52	4.32571e-51
54598	CALCRL	161.391	2.69837	0.176756	15.2661	1.28572e-52	4.47724e-51
71175	NIPBL	6915.56	1.2825	0.084146	15.2414	1.8786e-52	6.52596e-51
269941	CHSY1	2351.31	1.89474	0.124424	15.2281	2.30307e-52	7.9812e-51
232341	WNK1	27526.1	-1.30647	0.0858916	-15.2107	3.0038e-52	1.03845e-50
14132	FCGRT	142.977	6.08985	0.401425	15.1706	5.53803e-52	1.90996e-50
192231	HEXIM1	1536.03	0.716792	0.0472949	15.1558	6.93565e-52	2.38623e-50
237353	SH3RF3	307.29	3.85536	0.254531	15.1469	7.93951e-52	2.72507e-50
12876	CPE	16256.1	-1.33795	0.088345	-15.1446	8.22603e-52	2.81668e-50
17153	MAL	1719.84	-10.9303	0.722252	-15.1337	9.71486e-52	3.31855e-50
15245	HHIP	132.566	-3.73481	0.24706	-15.117	1.25139e-51	4.26455e-50
20024	SUB1	3687.37	1.45624	0.0963809	15.1092	1.40772e-51	4.78592e-50
21452	TCN2	674.087	-5.9746	0.396646	-15.0628	2.84431e-51	9.64713e-50
214305	hhipl1	851.672	2.04419	0.135725	15.0613	2.91163e-51	9.85217e-50
108075	LTBP4	1182.57	5.0936	0.338212	15.0604	2.95137e-51	9.96314e-50
170720	CARD14	413.961	-7.87703	0.523479	-15.0475	3.5867e-51	1.20794e-49
76976	Arxes2	169.625	2.45473	0.16314	15.0467	3.62628e-51	1.21841e-49
57778	FMNL1	704.622	-5.60399	0.372523	-15.0433	3.81771e-51	1.27974e-49
66522	PGPEP1	939.85	-1.58073	0.105097	-15.0406	3.97975e-51	1.33094e-49
68519	EML1	2155.93	1.63978	0.109158	15.0221	5.26264e-51	1.75589e-49
12231	BTN1A1	374.472	-5.12725	0.342107	-14.9873	8.89287e-51	2.96023e-49
93737	PARD6G	436.124	2.03844	0.136079	14.9799	9.93893e-51	3.30078e-49
223921	AAAS	1598.74	-0.939911	0.0627534	-14.9779	1.02473e-50	3.39533e-49
20698	SPHK1	996.446	-2.56152	0.171516	-14.9346	1.96356e-50	6.49106e-49
100503676	Gm38426	134.166	-3.90942	0.262132	-14.914	2.67419e-50	8.81991e-49
195209	Gm22	1025.45	-3.06325	0.205418	-14.9123	2.74152e-50	9.02125e-49
59035	CARM1	3389.52	0.956921	0.0642577	14.8919	3.7183e-50	1.22074e-48
94216	COL4A6	966.4	-10.5785	0.710648	-14.8857	4.08298e-50	1.33741e-48
67880	DCXR	280.805	-1.73357	0.116557	-14.8732	4.92227e-50	1.60865e-48
106877	AFAP1L1	386.791	-8.5865	0.577413	-14.8706	5.11199e-50	1.66686e-48
66853	PNPLA2	1330.45	-1.34972	0.0909303	-14.8435	7.66856e-50	2.4948e-48
19294	NECTIN2	998.171	-2.63462	0.177545	-14.8392	8.1764e-50	2.654e-48
66086	FOPNL	1376.27	-0.669393	0.0452298	-14.7998	1.46885e-49	4.757e-48
80976	SYT13	1986.63	-6.10193	0.413812	-14.7457	3.28108e-49	1.06022e-47
22673	Zfp185	268.564	-7.7333	0.524757	-14.7369	3.73443e-49	1.204e-47
218699	PXK	1447.96	0.979422	0.0664903	14.7303	4.11811e-49	1.32472e-47
19143	ST14	1984.48	-12.3626	0.840058	-14.7163	5.06545e-49	1.62582e-47
13038	CTSK	1064.03	10.7744	0.73309	14.6972	6.71862e-49	2.15161e-47
26941	SLC9A3R1	1265.12	-3.39788	0.231489	-14.6784	8.86989e-49	2.83422e-47
328258	SLC25A48	2633.5	-12.7718	0.870506	-14.6717	9.78424e-49	3.11943e-47
11421	ACE	197.605	-7.44252	0.507467	-14.666	1.06383e-48	3.38419e-47
12740	CLDN4	4557.07	-15.584	1.06316	-14.6582	1.19477e-48	3.79234e-47
16803	LBP	206.24	-6.34507	0.433524	-14.636	1.65465e-48	5.24044e-47
207798	GRAMD1C	90.9547	-4.57903	0.313063	-14.6265	1.90225e-48	6.01137e-47
22223	UCHL1	488.107	3.80235	0.26016	14.6154	2.23875e-48	7.05919e-47
319742	MPZL3	251.887	-5.9002	0.403732	-14.6142	2.28134e-48	7.17772e-47
234683	ELMO3	170.41	-3.07428	0.21048	-14.606	2.56998e-48	8.06815e-47
15980	IFNGR2	1025.7	-0.955021	0.065498	-14.5809	3.71396e-48	1.16341e-46
22422	WNT7B	5112.73	-15.0285	1.03115	-14.5746	4.07781e-48	1.27461e-46
19400	RAPSN	101.414	-5.02396	0.345099	-14.558	5.19281e-48	1.61959e-46
20168	RTN3	6894.66	-0.7275	0.0499958	-14.5512	5.73655e-48	1.7853e-46
171508	creld1	288.691	-5.13126	0.353087	-14.5326	7.53524e-48	2.34e-46
20720	SERPINE2	4425	-7.24355	0.498763	-14.523	8.65874e-48	2.68309e-46
229488	FAM160A1	672.585	-1.1315	0.0779634	-14.5132	9.99994e-48	3.09201e-46
66381	RNF113A2	387.192	1.66569	0.114785	14.5114	1.02655e-47	3.1673e-46
30935	TOR3A	1905.95	-1.30678	0.0901102	-14.502	1.17657e-47	3.62236e-46
242050	IGSF10	366.072	5.18555	0.357858	14.4905	1.39064e-47	4.27229e-46
244373	ERLIN2	2207.8	-1.04366	0.0720282	-14.4896	1.41038e-47	4.32365e-46
72043	SULF2	5011.05	-3.6294	0.250807	-14.4709	1.85024e-47	5.66001e-46
11630	AIM1	5192.06	-3.07308	0.212642	-14.4519	2.43848e-47	7.44359e-46
85031	PLA1A	184.048	-5.67929	0.394373	-14.4008	5.11387e-47	1.55772e-45
13244	DEGS1	8248.45	-0.457943	0.0318375	-14.3838	6.54453e-47	1.98929e-45
235180	FEZ1	110.99	4.66909	0.324776	14.3764	7.28306e-47	2.20909e-45
14269	FNBP1	1425.13	1.86672	0.129943	14.3657	8.49409e-47	2.57098e-45
109929	ZBTB25	452.605	1.29519	0.0902639	14.3489	1.08278e-46	3.27044e-45
170772	GLCCI1	483.031	2.23043	0.155548	14.3391	1.24644e-46	3.75685e-45
259277	KLK8	279.018	-3.55691	0.248544	-14.311	1.86843e-46	5.6198e-45
226251	ABLIM1	1274.61	-2.35042	0.164393	-14.2976	2.26581e-46	6.80075e-45
64058	PERP	6641.15	-4.12492	0.288514	-14.2971	2.2813e-46	6.83294e-45
54391	RFK	1755.57	-0.728344	0.0509509	-14.295	2.35008e-46	7.0243e-45
14537	GCNT1	292.24	-6.84644	0.4798	-14.2694	3.39576e-46	1.01287e-44
20947	SWAP70	3174	1.59491	0.111783	14.2679	3.46701e-46	1.03197e-44
54525	SYT7	335.298	4.98716	0.349609	14.265	3.61659e-46	1.07427e-44
12223	BTC	191.647	-3.32758	0.23346	-14.2533	4.27442e-46	1.26705e-44
328949	MCC	3052.7	1.36086	0.0956621	14.2257	6.34892e-46	1.8781e-44
21415	TCF7L1	460.406	1.67864	0.118021	14.2233	6.57109e-46	1.93982e-44
67213	CMTM6	1009.04	-0.788128	0.0555029	-14.1998	9.19031e-46	2.70746e-44
215351	SENP6	2912.11	0.718428	0.050622	14.192	1.02678e-45	3.0187e-44
16568	KIF3A	1076.24	-0.841264	0.0592816	-14.191	1.04174e-45	3.05641e-44
223775	PIM3	1331.21	-1.90783	0.134496	-14.185	1.13501e-45	3.32328e-44
78757	RICTOR	2667.7	1.04054	0.0733609	14.1838	1.15376e-45	3.37128e-44
15530	HSPG2	15201.2	1.75827	0.124059	14.1729	1.34808e-45	3.93107e-44
320051	EXPH5	209.433	-7.89123	0.556833	-14.1716	1.37264e-45	3.99459e-44
89867	SEC16B	179.539	7.35781	0.519201	14.1714	1.37697e-45	3.99906e-44
56742	PSRC1	855.85	-1.5554	0.109961	-14.1451	2.00336e-45	5.80649e-44
20466	SIN3A	2408.12	0.573642	0.0406269	14.1198	2.87008e-45	8.30181e-44
52626	CDKN2AIPNL	2222.93	-1.4298	0.101303	-14.1142	3.10558e-45	8.96495e-44
58194	SH3KBP1	4543.84	1.56981	0.111276	14.1073	3.42439e-45	9.86541e-44
20310	CXCL2	261.505	-3.93008	0.278716	-14.1007	3.76015e-45	1.0811e-43
105837	MTBP	1742.08	1.31293	0.0932799	14.0752	5.39821e-45	1.54896e-43
52428	RHPN2	216.139	-3.76472	0.267673	-14.0646	6.26437e-45	1.79391e-43
93703	PCDHGB6	177.306	-7.45662	0.53034	-14.0601	6.68059e-45	1.90929e-43
381175	CCDC68	168.223	-7.37844	0.525959	-14.0286	1.04241e-44	2.97324e-43
14042	EXT1	6859.92	1.1998	0.0856607	14.0064	1.42405e-44	4.05373e-43
80884	MAGED2	1413.83	-1.80984	0.129314	-13.9957	1.65583e-44	4.70421e-43
21929	TNFAIP3	2359.46	-4.0149	0.286918	-13.9932	1.71538e-44	4.86374e-43
13860	EPS8	11247.3	2.55707	0.182805	13.988	1.84589e-44	5.22347e-43
103172	CHCHD10	353.911	-8.28042	0.59276	-13.9693	2.4009e-44	6.78066e-43
225870	RIN1	2692.13	0.910697	0.0652402	13.9591	2.76736e-44	7.80027e-43
100502825	Rpl37rt	1899.65	0.942403	0.0675531	13.9506	3.12141e-44	8.78096e-43
170706	TMEM37	308.563	-2.25596	0.161814	-13.9417	3.53552e-44	9.92643e-43
67241	SMC6	5212.8	0.643892	0.0462369	13.9259	4.40855e-44	1.23534e-42
236899	PCYT1B	1466.07	-2.19683	0.157944	-13.9089	5.59238e-44	1.56401e-42
70082	LYSMD2	345.837	2.224	0.159925	13.9065	5.78295e-44	1.61416e-42
333654	PPP1R13L	1584.1	-1.5137	0.108896	-13.9005	6.29305e-44	1.75313e-42
21429	UBTF	5930.79	0.553731	0.0398451	13.8971	6.59862e-44	1.8347e-42
72284	ORAOV1	546.97	-1.02783	0.0740452	-13.8812	8.24044e-44	2.28676e-42
15939	IER5	3680.09	1.44559	0.104154	13.8793	8.45485e-44	2.34173e-42
54135	LSR	1192.95	-11.6276	0.837977	-13.8758	8.88346e-44	2.4557e-42
67905	PPM1M	434.714	1.2883	0.093	13.8527	1.22603e-43	3.38267e-42
207920	ESRP1	2161.36	-14.5077	1.0473	-13.8525	1.22882e-43	3.38386e-42
14104	FASN	31457.6	0.711147	0.0513616	13.8459	1.34719e-43	3.7027e-42
13845	EPHB3	600.591	-1.48574	0.107323	-13.8437	1.38923e-43	3.81095e-42
217410	TRIB2	2203.44	2.43644	0.176123	13.8337	1.59486e-43	4.36668e-42
241639	FERMT1	633.403	-10.2969	0.744877	-13.8236	1.83709e-43	5.02032e-42
17532	MRAS	1067.95	2.11017	0.15267	13.8218	1.88377e-43	5.13812e-42
140780	BMP2K	1427.08	0.745161	0.0539238	13.8188	1.96369e-43	5.34593e-42
100502698	rubcn	2249.65	-0.990841	0.0717737	-13.8051	2.37542e-43	6.45458e-42
18719	PIP5K1B	256.363	-7.98511	0.578891	-13.7938	2.77709e-43	7.53175e-42
80877	LRBA	1743.53	-1.81735	0.131795	-13.7892	2.96056e-43	8.01418e-42
75541	Nat8f4	102.374	-4.92383	0.357545	-13.7712	3.79614e-43	1.02567e-41
16404	itga7	146.615	-2.65669	0.193064	-13.7607	4.3952e-43	1.1853e-41
68646	NADK2	866.774	2.25706	0.164054	13.758	4.55892e-43	1.22715e-41
211401	MTSS1	1557.47	-1.15776	0.0841597	-13.7567	4.64424e-43	1.24777e-41
30795	FKBP3	2666.89	0.988504	0.0718944	13.7494	5.1365e-43	1.37745e-41
69718	IPMK	1582.8	1.27528	0.0928279	13.7382	5.99765e-43	1.60538e-41
54120	GIPC2	169.426	-5.38617	0.392137	-13.7354	6.23011e-43	1.6645e-41
12454	CCNK	2330.94	0.871192	0.0634944	13.7208	7.62541e-43	2.03349e-41
13835	EPHA1	472.383	-9.55043	0.697254	-13.6972	1.05514e-42	2.80856e-41
56018	STARD10	726.865	-4.30094	0.314159	-13.6903	1.16001e-42	3.08198e-41
83603	ELOVL4	459.387	2.06408	0.150783	13.6891	1.18033e-42	3.13016e-41
380967	TMEM106C	615.783	-1.17561	0.0859762	-13.6737	1.45828e-42	3.86013e-41
20499	SLC12A7	1402.8	-1.85843	0.136104	-13.6545	1.89826e-42	5.01553e-41
18260	OCLN	153.134	-7.24212	0.530828	-13.6431	2.22005e-42	5.85497e-41
67338	RFFL	744.948	1.54751	0.113539	13.6297	2.66593e-42	7.01799e-41
93699	PCDHGB1	141.772	7.00381	0.514415	13.6151	3.25632e-42	8.55649e-41
15015	H2-Q4	1877.17	-1.83074	0.134555	-13.6058	3.69671e-42	9.69592e-41
18553	PCSK6	1031.57	-8.12169	0.597357	-13.596	4.22751e-42	1.10679e-40
16400	ITGA3	15639.8	-3.73534	0.27479	-13.5935	4.37825e-42	1.14417e-40
11487	ADAM10	6702.97	-0.817945	0.0602007	-13.587	4.78533e-42	1.24828e-40
55948	SFN	363.597	-5.65509	0.416796	-13.568	6.19816e-42	1.61388e-40
218865	CHDH	179.942	-6.29001	0.463619	-13.5672	6.26749e-42	1.62898e-40
14369	FZD7	3205.12	1.77907	0.131146	13.5656	6.4022e-42	1.66098e-40
72434	LYPD3	203.894	-7.84684	0.579244	-13.5467	8.28947e-42	2.14673e-40
211389	SUOX	516.237	-2.62314	0.193822	-13.5338	9.88291e-42	2.55478e-40
22145	tuba4a	6266.47	-0.654204	0.0483475	-13.5313	1.02213e-41	2.63751e-40
107065	LRRTM2	131.775	4.93935	0.365039	13.531	1.02611e-41	2.64302e-40
16922	PHYH	183.817	-1.88136	0.139155	-13.5199	1.19369e-41	3.06914e-40
15586	HYAL1	310.147	-2.41013	0.178302	-13.5171	1.23941e-41	3.18099e-40
70790	UBR5	16672.5	1.43262	0.106121	13.4998	1.5672e-41	4.01511e-40
224613	FLYWCH1	1215.02	1.18983	0.0881721	13.4944	1.68805e-41	4.31701e-40
217030	SYNRG	859.551	-1.05956	0.0785284	-13.4927	1.72637e-41	4.40715e-40
269999	ORAI3	547.546	1.47569	0.109419	13.4866	1.87601e-41	4.78067e-40
69219	DDAH1	2172.57	-2.2754	0.16892	-13.4703	2.34022e-41	5.95304e-40
20195	S100A11	2897.1	-1.02583	0.0762163	-13.4595	2.70771e-41	6.87567e-40
109620	DSP	4258.42	-14.0444	1.04353	-13.4586	2.73913e-41	6.94315e-40
83679	PDE4DIP	3258.44	-1.081	0.0803847	-13.4478	3.17124e-41	8.02429e-40
18826	LCP1	2066.97	-12.01	0.893469	-13.442	3.4295e-41	8.6625e-40
104721	DDX1	7416.09	0.609116	0.0453175	13.4411	3.47298e-41	8.75692e-40
73246	RASSF6	411.43	-3.88519	0.289135	-13.4373	3.6544e-41	9.19818e-40
229541	DENND4B	439.034	2.33619	0.174174	13.413	5.07729e-41	1.27573e-39
330406	B4GALNT3	227.798	-8.23363	0.614531	-13.3982	6.19099e-41	1.55283e-39
225115	svil	2996.46	-1.59396	0.118991	-13.3956	6.41865e-41	1.60713e-39
67138	HERC6	433.997	-1.39255	0.103974	-13.3932	6.62257e-41	1.6553e-39
20336	EXOC4	2513.19	-1.20638	0.0901876	-13.3763	8.31465e-41	2.07461e-39
218518	MARVELD2	203.026	-8.06737	0.603439	-13.369	9.17773e-41	2.28599e-39
67815	SEC14L2	184.078	-3.77175	0.282228	-13.3642	9.78975e-41	2.4342e-39
16975	LRP8	3453.27	1.02483	0.0767881	13.3462	1.24721e-40	3.09579e-39
71766	RAVER1	4708.92	0.511457	0.0383659	13.331	1.52768e-40	3.78543e-39
666704	SAMD1	1187.65	1.14645	0.086015	13.3285	1.58027e-40	3.90899e-39
18214	DDR2	5522.97	6.40345	0.481307	13.3043	2.18574e-40	5.39739e-39
14425	GALNT3	875.08	-11.18	0.840954	-13.2945	2.49228e-40	6.14376e-39
60599	Trp53inp1	2895.72	-3.34738	0.251937	-13.2866	2.76982e-40	6.81623e-39
20973	SYNGR2	2833.72	-0.987832	0.0743785	-13.2811	2.97823e-40	7.31656e-39
223527	ENY2	1829.71	1.33917	0.100837	13.2805	3.00341e-40	7.3658e-39
14814	GRIN2D	83.1069	4.39846	0.331203	13.2803	3.01335e-40	7.37756e-39
16403	ITGA6	3708.39	-2.211	0.166528	-13.2771	3.143e-40	7.68187e-39
16525	KCNK1	1139.35	-13.5839	1.02453	-13.2587	4.0189e-40	9.80597e-39
68292	STT3B	8177.43	0.565352	0.0426705	13.2492	4.55757e-40	1.11014e-38
207181	RBMS3	250.408	2.81953	0.212979	13.2385	5.25861e-40	1.27873e-38
100040608	Fancf	295.578	1.53482	0.116049	13.2256	6.24391e-40	1.51576e-38
207278	FCHSD2	876.357	0.983698	0.0743893	13.2237	6.40662e-40	1.55263e-38
12217	BSN	196.799	4.3887	0.332047	13.2171	6.99297e-40	1.69187e-38
12739	CLDN3	2637.27	-13.3551	1.01068	-13.214	7.28844e-40	1.76039e-38
66471	ANP32E	6334.92	0.546467	0.0413667	13.2103	7.64939e-40	1.84447e-38
11910	ATF3	256.506	-3.84085	0.29106	-13.196	9.24649e-40	2.22583e-38
56274	stk3	2032.15	1.00005	0.0758399	13.1863	1.0516e-39	2.52718e-38
72461	PRCP	1473.92	1.50534	0.114165	13.1856	1.0617e-39	2.5472e-38
192216	TMEM47	1122.88	-13.5634	1.02926	-13.1778	1.17845e-39	2.82257e-38
12349	Car2	475.495	-9.87889	0.749966	-13.1725	1.26413e-39	3.02274e-38
382571	KCNF1	311.184	-3.07664	0.233589	-13.1712	1.28588e-39	3.06964e-38
13008	CSRP2	954.032	4.13073	0.314181	13.1476	1.7557e-39	4.18422e-38
105349	Akr1c18	497.803	6.4289	0.489532	13.1327	2.13751e-39	5.08571e-38
59003	MAEA	4639.36	-0.539068	0.0410926	-13.1184	2.5845e-39	6.13905e-38
232164	PAIP2B	1365.64	-0.856987	0.0653709	-13.1096	2.90081e-39	6.87899e-38
68775	ATP6V1C2	98.2996	-6.13097	0.467856	-13.1044	3.10749e-39	7.35696e-38
232934	MYPOP	362.035	1.92474	0.147163	13.079	4.34081e-39	1.02599e-37
70673	PRDM16	173.651	7.89289	0.603531	13.0779	4.40622e-39	1.03974e-37
110109	NOP2	5069.83	0.558166	0.0426854	13.0763	4.49857e-39	1.05979e-37
432940	OTULIN	1113.13	0.845287	0.0646745	13.0699	4.89466e-39	1.15121e-37
70097	SASH1	3661.77	1.28563	0.0984166	13.0631	5.35066e-39	1.2564e-37
69540	KLK10	536.768	1.58897	0.121716	13.0547	5.97673e-39	1.40111e-37
13014	CSTB	3832.2	-1.21458	0.093081	-13.0486	6.47431e-39	1.51528e-37
231668	vsig10	320.652	-1.94146	0.148842	-13.0438	6.89447e-39	1.61099e-37
12053	BCL6	928.741	-1.03543	0.07942	-13.0374	7.49749e-39	1.74905e-37
229011	SAMD10	285.365	-2.13137	0.163497	-13.0362	7.61632e-39	1.77389e-37
77579	MYH10	2761.07	-14.1396	1.08499	-13.032	8.04467e-39	1.87061e-37
26943	SERINC3	15087	-2.67501	0.205582	-13.0119	1.04714e-38	2.43095e-37
100502897	Gm12854	1303.77	-1.07454	0.0825871	-13.011	1.05944e-38	2.45554e-37
327826	FRS2	2873.89	1.1237	0.0863848	13.0081	1.10078e-38	2.54725e-37
380921	DGKH	204.077	3.34248	0.25701	13.0052	1.14265e-38	2.63987e-37
20377	SFRP1	1145.62	-13.5922	1.04651	-12.9881	1.43008e-38	3.29861e-37
59092	PCBP4	2794.88	1.89312	0.146005	12.9661	1.90422e-38	4.38521e-37
26408	MAP3K5	674.366	-2.62853	0.202903	-12.9546	2.2117e-38	5.08468e-37
16210	IMPACT	4189.33	1.31287	0.101345	12.9545	2.21505e-38	5.08468e-37
229445	CTSO	163.341	-1.79435	0.138661	-12.9405	2.65775e-38	6.08313e-37
20878	AURKA	2865.28	0.572498	0.0442407	12.9405	2.65848e-38	6.08313e-37
100862305	#N/A	165.418	7.81975	0.604491	12.9361	2.81598e-38	6.43326e-37
104806	fancm	1738.57	0.738259	0.0571121	12.9265	3.19109e-38	7.27863e-37
93732	ACOX2	137.765	-7.28058	0.563589	-12.9182	3.55182e-38	8.08857e-37
27055	FKBP9	5234.29	0.870195	0.067407	12.9096	3.97566e-38	9.03942e-37
74137	NUAK2	449.259	-2.51344	0.195113	-12.882	5.68633e-38	1.29085e-36
214627	PAPD5	2689.14	0.711051	0.0552111	12.8788	5.92627e-38	1.34319e-36
11839	AREG	708.046	-4.88562	0.379749	-12.8654	7.04795e-38	1.5949e-36
74006	DNM1L	3653.97	-0.472207	0.0367126	-12.8622	7.34218e-38	1.65887e-36
53624	CLDN7	844.988	-13.1532	1.02331	-12.8536	8.21455e-38	1.85305e-36
14404	GABRE	101.161	-6.31231	0.491346	-12.847	8.94454e-38	2.01456e-36
99167	SSX2IP	1040.96	-1.1018	0.0858593	-12.8326	1.07654e-37	2.42086e-36
56460	PKP3	996.788	-4.6109	0.359455	-12.8275	1.1505e-37	2.58313e-36
13198	DDIT3	519.004	-1.40881	0.109841	-12.8259	1.17469e-37	2.63333e-36
21423	TCF3	3660.7	0.652223	0.0508866	12.8172	1.31371e-37	2.94038e-36
16402	ITGA5	5362.05	1.02569	0.0801019	12.8049	1.53998e-37	3.44145e-36
21930	TNFAIP6	105.376	2.59584	0.202761	12.8024	1.58881e-37	3.54505e-36
13025	Ctla2b	192.993	-1.95101	0.152478	-12.7954	1.74048e-37	3.87744e-36
13437	DNPEP	1105.99	-0.779936	0.0609577	-12.7947	1.75533e-37	3.90445e-36
27273	PDK4	356.68	-8.87391	0.694292	-12.7812	2.08722e-37	4.63551e-36
13476	REEP5	4947.95	-0.972577	0.0761439	-12.7729	2.32404e-37	5.15347e-36
21934	TNFRSF11A	80.8849	-4.47128	0.350506	-12.7567	2.86197e-37	6.33653e-36
54608	ABHD2	7428.08	-1.49162	0.116999	-12.749	3.15628e-37	6.97737e-36
269437	PLCH1	109.183	-2.5783	0.20233	-12.743	3.4089e-37	7.52422e-36
17035	LXN	1807.37	1.84137	0.144511	12.7421	3.45058e-37	7.60453e-36
14630	GCLM	8064.65	1.46763	0.115193	12.7406	3.51703e-37	7.73909e-36
223650	EPPK1	162.907	-7.51994	0.590453	-12.7359	3.73598e-37	8.20828e-36
14299	NCS1	2736.07	1.80695	0.142124	12.7139	4.95073e-37	1.08606e-35
17754	MAP1A	2424.72	6.54841	0.515148	12.7117	5.09054e-37	1.11502e-35
16009	IGFBP3	141.825	-6.439	0.506727	-12.707	5.40539e-37	1.18218e-35
22381	WBP5	3127.3	-0.9667	0.0760825	-12.7059	5.48025e-37	1.19673e-35
22631	YWHAZ	9188.44	0.842825	0.0663472	12.7033	5.67227e-37	1.23678e-35
109095	RBM15B	1779.31	0.805686	0.0634452	12.6989	5.99403e-37	1.30495e-35
66985	RASSF7	587.394	-1.7187	0.1354	-12.6935	6.42365e-37	1.39637e-35
338372	MAP3K9	583.825	-7.91799	0.624275	-12.6835	7.30045e-37	1.58456e-35
26457	SLC27A1	2349.14	2.23485	0.176459	12.665	9.24676e-37	2.00398e-35
16763	LAD1	3754.57	-9.17511	0.725054	-12.6544	1.05796e-36	2.28938e-35
27260	PLEK2	83.4826	-3.28692	0.259889	-12.6474	1.15646e-36	2.49875e-35
13511	DSG2	836.319	-13.1378	1.03899	-12.6448	1.19537e-36	2.57895e-35
19200	PSTPIP1	331.467	-2.69989	0.213524	-12.6444	1.20107e-36	2.58734e-35
52055	rab11fip5	5329.46	-1.30969	0.103601	-12.6417	1.24412e-36	2.67607e-35
101772	ANO1	4451.51	-6.54125	0.517981	-12.6284	1.47298e-36	3.1636e-35
73737	1110008P14Rik	1082.23	-1.86833	0.147971	-12.6264	1.51126e-36	3.24096e-35
17191	MBD2	2675.33	-0.568031	0.0449937	-12.6247	1.54361e-36	3.30539e-35
78244	DNAJC21	1271.29	1.25159	0.0991627	12.6216	1.60487e-36	3.43145e-35
58220	PARD6B	546.088	-3.36024	0.266308	-12.6178	1.68377e-36	3.59479e-35
12444	CCND2	4727.04	6.1801	0.490214	12.607	1.93311e-36	4.11624e-35
231858	RADIL	112.455	2.60802	0.206872	12.6069	1.93375e-36	4.11624e-35
217869	EIF5	12725	0.603427	0.0478899	12.6003	2.1036e-36	4.47116e-35
24063	SPRY1	234.517	-3.37669	0.268083	-12.5957	2.22959e-36	4.73195e-35
257632	NOD2	101.891	-4.99608	0.396754	-12.5924	2.32498e-36	4.9271e-35
67832	BRIX1	3211.34	1.05026	0.0834198	12.5901	2.39413e-36	5.06615e-35
54563	NUP210	438.995	-6.41321	0.509399	-12.5898	2.4041e-36	5.07977e-35
18080	NIN	3167.64	1.50113	0.119289	12.5839	2.58803e-36	5.46035e-35
208898	UNC13C	124.719	-5.39272	0.428685	-12.5797	2.73056e-36	5.75262e-35
223601	FAM49B	3808.85	1.07946	0.0858661	12.5714	3.0313e-36	6.37683e-35
109246	TSPAN9	3422.71	1.24275	0.0989077	12.5647	3.30082e-36	6.93365e-35
14538	gcnt2	695.886	-3.16642	0.252211	-12.5546	3.74854e-36	7.86262e-35
14806	GRIK2	105.759	-6.70163	0.533803	-12.5545	3.75525e-36	7.86519e-35
16420	ITGB6	797.774	-13.0702	1.04127	-12.5521	3.86925e-36	8.09215e-35
19355	RAD1	605.901	1.28937	0.102805	12.5419	4.40245e-36	9.19388e-35
94040	CLMN	279.444	-6.864	0.547363	-12.5401	4.5021e-36	9.38833e-35
20317	SERPINF1	4589.95	9.06518	0.723685	12.5264	5.35264e-36	1.11458e-34
18132	NOTCH4	943.953	-5.20745	0.415891	-12.5212	5.71872e-36	1.18908e-34
12833	COL6A1	3610.91	4.02047	0.321288	12.5136	6.29084e-36	1.30615e-34
243771	PARP12	882.568	-1.19482	0.0954898	-12.5125	6.377e-36	1.32212e-34
69064	FUOM	156.191	-3.14045	0.251109	-12.5063	6.89497e-36	1.42745e-34
18519	KAT2B	1214.2	-1.67356	0.133886	-12.4999	7.47742e-36	1.5458e-34
54670	ATP8B1	211.975	-8.12267	0.650669	-12.4836	9.1774e-36	1.89451e-34
54139	IRF6	650.958	-12.7767	1.02381	-12.4796	9.64605e-36	1.98839e-34
209760	TMC7	266.875	-7.22121	0.578899	-12.474	1.03442e-35	2.12925e-34
101943	SF3B3	10847.5	0.551808	0.0442423	12.4724	1.05578e-35	2.1701e-34
230073	DDX58	1083.32	-1.99368	0.159861	-12.4713	1.07047e-35	2.19715e-34
246703	apoa1bp	782.912	-1.11582	0.0894735	-12.471	1.07484e-35	2.20296e-34
50772	MAPK6	14726.5	1.36961	0.109864	12.4664	1.13836e-35	2.32982e-34
230594	ZCCHC11	948.631	1.74714	0.140245	12.4578	1.26899e-35	2.59347e-34
66848	FUCA2	1914.15	-2.51148	0.201619	-12.4566	1.28798e-35	2.62854e-34
68016	MURC	158.693	7.77059	0.623964	12.4536	1.33702e-35	2.72475e-34
223455	41703	5621.66	0.845562	0.0679125	12.4508	1.38506e-35	2.81865e-34
70369	BAG5	1117.64	0.910332	0.0731536	12.4441	1.50567e-35	3.05926e-34
100198	H6PD	2387.9	-0.681198	0.0547415	-12.4439	1.50959e-35	3.05926e-34
269704	Zfp664	3909.24	-0.562903	0.0452353	-12.4439	1.50969e-35	3.05926e-34
16450	JAG2	84.3951	-3.70908	0.298107	-12.4421	1.54406e-35	3.12449e-34
17909	MYO10	11761.2	1.1873	0.0954638	12.4372	1.64128e-35	3.31655e-34
22367	VRK1	1534.42	0.782709	0.0629528	12.4333	1.72422e-35	3.47925e-34
69608	SEC24D	4371.36	0.909215	0.0731317	12.4326	1.73924e-35	3.50461e-34
329251	PPP1R12B	240.325	2.19284	0.17651	12.4233	1.95277e-35	3.92937e-34
171486	CD99L2	1804.48	-0.936433	0.075396	-12.4202	2.03098e-35	4.08101e-34
26360	angptl2	14433.6	2.07745	0.167379	12.4116	2.25993e-35	4.53472e-34
18082	NIPSNAP1	540.825	-5.1592	0.415771	-12.4087	2.34313e-35	4.69509e-34
234797	6430548M08Rik	291.168	-3.1328	0.252521	-12.4061	2.42255e-35	4.84746e-34
235584	DUSP7	2809.14	-1.20155	0.0968772	-12.4028	2.52216e-35	5.03975e-34
21817	TGM2	3034.34	-4.42862	0.357865	-12.3751	3.5636e-35	7.11085e-34
12370	casp8	1270.52	-1.00303	0.0811015	-12.3676	3.91325e-35	7.79769e-34
433256	ACSL5	6717.31	-0.93296	0.0754676	-12.3624	4.17518e-35	8.30809e-34
14234	FOXC2	948.486	12.6484	1.0238	12.3544	4.61136e-35	9.16332e-34
12006	AXIN2	208.428	-5.68511	0.460276	-12.3515	4.78051e-35	9.48631e-34
330260	PON2	1397.53	-1.61861	0.131146	-12.342	5.38042e-35	1.0662e-33
18795	PLCB1	240.577	1.74941	0.141977	12.3218	6.91082e-35	1.36758e-33
70237	BHLHB9	969.655	1.57347	0.127704	12.3212	6.96516e-35	1.37644e-33
67432	HOGA1	128.151	-3.36887	0.273551	-12.3153	7.48928e-35	1.47797e-33
21872	TJP1	6176.05	-0.901931	0.0733172	-12.3018	8.86161e-35	1.74639e-33
20613	SNAI1	1238.77	3.52442	0.286688	12.2936	9.80973e-35	1.93059e-33
97130	C77080	3840.3	-1.60122	0.130457	-12.2739	1.25094e-34	2.45852e-33
78658	NCAPD3	1742.08	0.68262	0.0556302	12.2707	1.30167e-34	2.55472e-33
56356	GLTP	2015.64	-1.04796	0.0854773	-12.2602	1.48218e-34	2.90503e-33
68498	TSPAN11	946.653	11.3404	0.925215	12.257	1.54028e-34	3.0148e-33
64339	FNDC4	131.276	-3.54168	0.289111	-12.2503	1.67468e-34	3.27338e-33
239217	KCTD12	1028.62	3.74081	0.305455	12.2467	1.7499e-34	3.41576e-33
17256	MEA1	919.702	-0.701572	0.0573061	-12.2425	1.84195e-34	3.59056e-33
14368	FZD6	1684.54	-2.86901	0.234483	-12.2355	2.00977e-34	3.91238e-33
11443	chrnb1	623.096	-3.78995	0.309892	-12.2299	2.15155e-34	4.1827e-33
19201	PSTPIP2	85.5424	-3.41642	0.279358	-12.2295	2.16188e-34	4.19708e-33
56532	ripk3	1380.5	12.4735	1.02011	12.2276	2.21326e-34	4.29104e-33
14325	Ftl1	15855.7	1.43763	0.117725	12.2117	2.69221e-34	5.21257e-33
75705	EIF4B	10409.8	-0.758117	0.0621111	-12.2058	2.89414e-34	5.59598e-33
24059	SLCO2A1	6288.6	-5.57897	0.457137	-12.2041	2.954e-34	5.70405e-33
67092	GATM	716.428	3.16497	0.259365	12.2028	3.00357e-34	5.79197e-33
20187	RYK	4248.73	1.22429	0.100422	12.1915	3.45092e-34	6.64568e-33
100017	LDLRAP1	989.78	0.753503	0.0618324	12.1862	3.68135e-34	7.07994e-33
100042150	NRG2	107.931	-5.3091	0.436091	-12.1743	4.26078e-34	8.18331e-33
353187	NR1D2	1109.15	1.06112	0.087222	12.1658	4.72971e-34	9.0718e-33
239393	LRP12	1528.46	1.69802	0.139634	12.1605	5.04477e-34	9.6632e-33
14012	MPZL2	872.368	-13.1987	1.08786	-12.1328	7.07897e-34	1.35416e-32
217653	MIS18BP1	1555.64	0.809196	0.0667486	12.123	7.97587e-34	1.5237e-32
18767	PKIA	517.295	-12.4445	1.02706	-12.1167	8.61438e-34	1.64349e-32
27276	PLEKHB1	270.93	-6.3353	0.523057	-12.112	9.11863e-34	1.73738e-32
140743	REM2	130.773	-6.83566	0.564579	-12.1075	9.63381e-34	1.83311e-32
93686	RBFOX2	5663.44	0.595665	0.0492202	12.102	1.03014e-33	1.95754e-32
67211	ARMC10	598.165	-1.0224	0.0845251	-12.0958	1.11181e-33	2.10993e-32
66864	CLEC14A	585.322	12.6738	1.04796	12.0938	1.1387e-33	2.15812e-32
140570	PLXNB2	14219.1	-0.877395	0.0725794	-12.0888	1.21092e-33	2.29196e-32
67016	TBC1D2B	1936.24	2.5056	0.207317	12.0859	1.25437e-33	2.37108e-32
72831	DHX30	2399.13	0.629963	0.0521445	12.0811	1.32949e-33	2.50977e-32
224703	41699	598.133	-1.11768	0.0925221	-12.0801	1.34496e-33	2.53564e-32
22410	WNT10B	116.069	7.31137	0.605272	12.0795	1.35558e-33	2.55229e-32
68176	FAM212A	93.4684	3.8029	0.314994	12.0729	1.46832e-33	2.76094e-32
20969	sdc1	7692.56	-0.895328	0.0742061	-12.0654	1.60831e-33	3.02021e-32
21983	TPBG	3793.26	1.85271	0.15365	12.058	1.76108e-33	3.30278e-32
217304	CD300LB	548.488	5.0775	0.421186	12.0552	1.82012e-33	3.40904e-32
72469	PLCD3	714.578	-1.88856	0.156816	-12.0432	2.10635e-33	3.93999e-32
64138	CTSZ	2497.54	0.790607	0.0656567	12.0415	2.14977e-33	4.01598e-32
16870	LHX2	97.1874	6.1671	0.512535	12.0325	2.39713e-33	4.47225e-32
93696	CHRAC1	795.237	0.975504	0.0812303	12.0091	3.18214e-33	5.9291e-32
71678	BROX	1183.62	-0.68354	0.0569254	-12.0076	3.2397e-33	6.02853e-32
22032	TRAF4	2265.57	-0.819987	0.0682957	-12.0064	3.28748e-33	6.10953e-32
76686	CLIP3	165.904	7.59702	0.632892	12.0037	3.3991e-33	6.30877e-32
195733	GRHL1	70.619	-3.45026	0.287473	-12.002	3.46673e-33	6.426e-32
65116	prrg2	254.675	-1.51269	0.126075	-11.9983	3.62609e-33	6.71271e-32
228366	LARGE2	154.414	-7.9386	0.661811	-11.9953	3.76185e-33	6.95506e-32
209200	DTX3L	743.351	-1.56001	0.130056	-11.9949	3.77804e-33	6.976e-32
70028	DOPEY2	417.632	-1.02386	0.0854611	-11.9805	4.49715e-33	8.29313e-32
74559	ELOVL7	469.16	-4.4848	0.37437	-11.9796	4.54495e-33	8.37053e-32
80889	mesdc1	2229.15	1.4478	0.12088	11.9772	4.67724e-33	8.60313e-32
71957	CPSF3L	1567.03	0.761531	0.0636037	11.9731	4.91863e-33	9.03555e-32
56612	PFDN5	712.693	-1.00162	0.0836976	-11.9672	5.28042e-33	9.68775e-32
216795	WNT9A	153.541	-3.7402	0.312767	-11.9584	5.86794e-33	1.07519e-31
234515	INPP4B	441.757	2.09634	0.175802	11.9245	8.82312e-33	1.61445e-31
277010	MARVELD1	1356.82	2.22166	0.186313	11.9244	8.83353e-33	1.61445e-31
30928	zbtb18	891.367	-2.05836	0.172978	-11.8996	1.18975e-32	2.17167e-31
57752	TACC2	4455.32	1.25677	0.105626	11.8983	1.20717e-32	2.20067e-31
98432	PHLPP1	1050.73	-1.13403	0.0955606	-11.8671	1.75413e-32	3.19372e-31
53312	NUB1	2490.17	-0.654768	0.0551849	-11.865	1.79941e-32	3.27201e-31
66270	fam134b	2214.14	-0.469856	0.0396589	-11.8474	2.2185e-32	4.02897e-31
18584	PDE8A	216.779	4.83621	0.408268	11.8457	2.26589e-32	4.10983e-31
18458	PABPC1	52704.6	0.958112	0.0809581	11.8347	2.58406e-32	4.68101e-31
83602	GTF2A1	1377.22	0.774807	0.0654961	11.8298	2.7372e-32	4.95216e-31
73699	PPP2R1B	2478.96	0.673519	0.0569403	11.8285	2.78011e-32	5.02346e-31
76773	WDYHV1	573.954	1.07607	0.0910124	11.8234	2.95636e-32	5.33521e-31
56217	MPP5	1466.27	-0.716324	0.0606296	-11.8148	3.27501e-32	5.90284e-31
20540	SLC7A7	199.975	-5.90354	0.500028	-11.8064	3.61625e-32	6.50971e-31
66743	RNF220	1381.83	0.933328	0.0791759	11.788	4.49935e-32	8.08924e-31
17954	NAP1L2	133.615	7.07637	0.600317	11.7877	4.51607e-32	8.10915e-31
26562	NCDN	1769.13	1.17941	0.100114	11.7806	4.91385e-32	8.81237e-31
630499	H2-K2	186.577	-1.61567	0.137207	-11.7754	5.22401e-32	9.35691e-31
104184	BLMH	1797.32	0.551664	0.0468606	11.7724	5.41325e-32	9.68378e-31
52662	LDLRAD4	410.338	-1.67438	0.142307	-11.7659	5.84773e-32	1.0448e-30
56325	ABCB9	183.124	-4.82697	0.410384	-11.7621	6.12162e-32	1.09237e-30
71586	IFIH1	334.302	-2.66249	0.226512	-11.7543	6.71091e-32	1.19604e-30
213438	A630033H20Rik	131.632	7.26519	0.618836	11.7401	7.93937e-32	1.41323e-30
223272	ITGBL1	427.314	12.2198	1.04128	11.7354	8.39701e-32	1.49284e-30
104445	CDC42EP1	1765.59	-1.46693	0.125259	-11.7112	1.11724e-31	1.98379e-30
69399	1700025G04Rik	1692.22	-2.21731	0.189472	-11.7025	1.23693e-31	2.19361e-30
22021	TPST1	725.083	1.33448	0.114196	11.6858	1.50614e-31	2.66773e-30
21956	TNNT2	1767.62	-2.88541	0.247141	-11.6752	1.70668e-31	3.0192e-30
17919	MYO5B	333.666	-9.78777	0.8384	-11.6743	1.72406e-31	3.04619e-30
60441	MRPL38	1305.37	-0.678951	0.0582146	-11.6629	1.97208e-31	3.48012e-30
110208	PGD	12311.1	0.860912	0.0738394	11.6592	2.05864e-31	3.62842e-30
107684	CORO2A	484.025	-3.54564	0.30423	-11.6545	2.17682e-31	3.832e-30
223473	NIPAL2	608.724	-11.9576	1.02604	-11.6542	2.185e-31	3.8417e-30
24017	RNF13	1728.59	-0.536979	0.0460917	-11.6502	2.28827e-31	4.01833e-30
80909	GATSL2	514.279	-1.61622	0.138754	-11.6481	2.34591e-31	4.11452e-30
66844	ORMDL2	718.119	-1.25646	0.107956	-11.6386	2.62257e-31	4.59413e-30
16188	IL3RA	106.147	-4.0525	0.348199	-11.6385	2.62656e-31	4.59552e-30
20842	STAG1	3859.04	0.7156	0.0615239	11.6312	2.85898e-31	4.99608e-30
21453	TCOF1	4880.37	1.08936	0.0936645	11.6304	2.88694e-31	5.0388e-30
58887	REPIN1	766.071	-0.923532	0.0794632	-11.6221	3.18083e-31	5.545e-30
269181	MGAT4A	765.637	-5.01641	0.431881	-11.6153	3.44654e-31	6.00092e-30
105785	KDELR3	497.793	2.14634	0.184804	11.6142	3.49209e-31	6.07286e-30
12159	BMP4	119.407	-5.9437	0.511788	-11.6136	3.51568e-31	6.10646e-30
228061	AGPS	4987.99	-0.521903	0.0449494	-11.6109	3.62792e-31	6.29381e-30
29861	dpf1	129.274	2.51877	0.21702	11.6062	3.83393e-31	6.64317e-30
102462	IMP3	988.112	0.747031	0.0643844	11.6027	3.9938e-31	6.91183e-30
16889	lipA	1295.63	0.702231	0.0606007	11.5878	4.74947e-31	8.20972e-30
57890	IL17RE	346.594	-11.8672	1.02438	-11.5848	4.92165e-31	8.4971e-30
72999	INSIG2	1168.25	-1.09687	0.094711	-11.5812	5.12939e-31	8.84512e-30
110058	syt17	276.473	-5.61973	0.485528	-11.5745	5.55147e-31	9.56146e-30
14055	EZH1	576.689	-1.01173	0.0874542	-11.5687	5.93468e-31	1.02092e-29
207521	DTX4	1792.18	-2.33443	0.201841	-11.5657	6.14914e-31	1.05655e-29
12182	BST1	451.674	-7.9744	0.689542	-11.5648	6.21609e-31	1.06677e-29
108156	MTHFD1	5390.19	0.692744	0.0599024	11.5645	6.23228e-31	1.06827e-29
213068	TMEM71	57.6086	-5.09272	0.440684	-11.5564	6.85158e-31	1.17303e-29
100503884	CCDC149	134.966	-7.48379	0.648182	-11.5458	7.74999e-31	1.32526e-29
210998	FAM91A1	9038.27	0.557901	0.0483278	11.5441	7.90626e-31	1.35037e-29
76408	ABCC3	152.408	-6.51871	0.564854	-11.5405	8.24134e-31	1.40593e-29
78339	TTYH3	1610.44	-0.609806	0.0528656	-11.535	8.78609e-31	1.49708e-29
12064	BDNF	1928.35	3.68671	0.319654	11.5335	8.94657e-31	1.52261e-29
15258	HIPK2	1495.64	-1.19744	0.103828	-11.5329	9.00846e-31	1.53133e-29
74055	PLCE1	64.0687	-4.68839	0.406841	-11.5239	1.00005e-30	1.69796e-29
21985	TPD52	3405.87	0.613451	0.0533145	11.5063	1.22677e-30	2.08044e-29
226751	CDC42BPA	5565.6	-1.10787	0.0963194	-11.5021	1.28795e-30	2.1816e-29
72388	RIPK4	411.03	-12.1136	1.05357	-11.4976	1.35599e-30	2.29415e-29
22402	WISP1	1170.3	2.69959	0.234935	11.4908	1.46817e-30	2.48101e-29
15248	HIC1	245.797	4.69919	0.409465	11.4764	1.73327e-30	2.92556e-29
70835	PRSS22	152.484	-6.65741	0.580165	-11.475	1.76146e-30	2.96964e-29
66913	KDELR2	4554.25	0.70327	0.0613198	11.4689	1.89089e-30	3.18411e-29
26570	SLC7A11	12248.2	1.77687	0.154944	11.4678	1.91384e-30	3.21898e-29
110960	TARS	7580.98	1.24666	0.108738	11.4647	1.98384e-30	3.33281e-29
67860	S100A16	1562.38	-10.0973	0.881205	-11.4585	2.13149e-30	3.57667e-29
13808	ENO3	950.388	3.82423	0.333996	11.4499	2.35348e-30	3.94455e-29
56873	LMBR1	399.989	-1.84386	0.161053	-11.4488	2.38506e-30	3.99282e-29
19252	DUSP1	660.025	2.29612	0.201151	11.4149	3.52174e-30	5.88885e-29
22183	Zrsr1	179.382	-8.47724	0.743006	-11.4094	3.75411e-30	6.27011e-29
216892	SPNS2	1888.62	-4.03313	0.353677	-11.4034	4.02015e-30	6.70663e-29
23936	LYNX1	427.869	-2.29597	0.20144	-11.3978	4.28718e-30	7.14381e-29
52377	RCN3	890.808	11.8383	1.03898	11.3941	4.47214e-30	7.44336e-29
74552	NIPAL3	153.361	-3.0073	0.264151	-11.3848	4.97952e-30	8.27824e-29
19731	RGL1	1045.56	3.01922	0.26539	11.3766	5.47181e-30	9.08612e-29
18626	PER1	1604.49	-1.39084	0.122271	-11.375	5.56831e-30	9.23567e-29
74103	NEBL	248.817	-4.21111	0.370359	-11.3704	5.87509e-30	9.73325e-29
54672	ADGRG3	85.5759	-4.70138	0.41359	-11.3672	6.08782e-30	1.0074e-28
65079	RTN4R	96.0572	-2.96501	0.261038	-11.3585	6.7284e-30	1.11188e-28
338349	CNTLN	434.16	1.37189	0.120782	11.3584	6.73464e-30	1.11188e-28
23801	ALOXE3	220.702	-4.94121	0.435049	-11.3578	6.78065e-30	1.11818e-28
106347	ILDR1	378.687	-11.9945	1.05663	-11.3516	7.27772e-30	1.19878e-28
238455	MACC1	1047.92	-4.83331	0.426256	-11.339	8.41121e-30	1.38389e-28
21976	TOP3B	1543.13	-0.782814	0.0691021	-11.3284	9.49528e-30	1.56047e-28
386454	RNF39	82.1528	-3.96992	0.350537	-11.3253	9.83936e-30	1.61516e-28
268564	ZBTB1	1629.26	0.686268	0.0606743	11.3107	1.16165e-29	1.90471e-28
18011	Neurl1a	543.719	-0.972438	0.0861057	-11.2935	1.41243e-29	2.31325e-28
21961	TNS1	1923.61	-2.82735	0.250379	-11.2923	1.43316e-29	2.34453e-28
72657	2700094K13Rik	1852.53	0.884464	0.0783966	11.2819	1.61203e-29	2.63414e-28
16155	IL10RB	626.577	-1.59175	0.141218	-11.2715	1.81375e-29	2.9604e-28
68790	Fendrr	66.7039	5.14029	0.456357	11.2637	1.98149e-29	3.2305e-28
75146	MFSD13A	102.511	-2.98384	0.265296	-11.2472	2.39028e-29	3.89256e-28
76867	RHBDD1	1576.36	-1.4235	0.126623	-11.242	2.53618e-29	4.12547e-28
16874	LHX6	252.458	2.20255	0.196033	11.2356	2.72611e-29	4.42939e-28
66371	CHMP4C	448.266	-11.5162	1.02534	-11.2316	2.85367e-29	4.6314e-28
16177	IL1R1	489.697	3.38354	0.30141	11.2257	3.04932e-29	4.94334e-28
20361	SEMA7A	492.195	3.87431	0.345381	11.2175	3.34628e-29	5.41863e-28
223453	DAP	10833.4	1.18088	0.105322	11.2122	3.55412e-29	5.7487e-28
66111	TMED3	1392.27	1.19086	0.106221	11.2112	3.59407e-29	5.80678e-28
16592	FABP5	358.045	-1.0465	0.0933917	-11.2055	3.83065e-29	6.18204e-28
242721	KLHDC7A	288.514	-9.57897	0.855117	-11.202	3.98851e-29	6.42957e-28
76974	urah	250.34	-8.96291	0.800313	-11.1993	4.11156e-29	6.62048e-28
56275	RBM14	2526.3	0.844926	0.075517	11.1886	4.63916e-29	7.46167e-28
68832	LDAH	1747.63	0.616105	0.0551014	11.1813	5.03434e-29	8.08821e-28
98952	FAM102A	1120.01	-2.73946	0.245399	-11.1633	6.16827e-29	9.8989e-28
110074	DUT	2207.75	0.655054	0.0586834	11.1625	6.22043e-29	9.97145e-28
235036	PPAN	1769.75	0.750877	0.0672719	11.1618	6.26907e-29	1.00382e-27
69693	POF1B	112.704	-6.9894	0.626397	-11.1581	6.53631e-29	1.04545e-27
229003	HELZ2	959.595	-1.55481	0.139558	-11.1409	7.92946e-29	1.26686e-27
217325	LLGL2	745.121	-3.75819	0.337368	-11.1397	8.03813e-29	1.28279e-27
14173	FGF2	107.554	2.55444	0.22972	11.1198	1.00485e-28	1.60184e-27
69590	GPX8	1362.36	1.38022	0.124138	11.1184	1.02106e-28	1.62587e-27
68135	EIF3H	5547.01	0.797405	0.0717291	11.1169	1.03815e-28	1.65126e-27
54396	Irgm2	254.544	-3.26964	0.294444	-11.1044	1.19353e-28	1.8963e-27
224903	SAFB	2904.66	0.524064	0.0472	11.103	1.21242e-28	1.92418e-27
72787	NDC1	3309.15	1.32071	0.118955	11.1025	1.21946e-28	1.93321e-27
69906	SLC25A32	1209.98	1.60774	0.145124	11.0783	1.59812e-28	2.5307e-27
20668	SOX13	111.763	-7.46923	0.674406	-11.0753	1.65381e-28	2.61602e-27
11492	ADAM19	2564.38	5.11308	0.461881	11.0701	1.75127e-28	2.76713e-27
18477	PRDX1	13260.9	1.77421	0.160361	11.0639	1.87853e-28	2.96494e-27
19672	RCN1	2369.4	1.17767	0.106469	11.0611	1.93709e-28	3.054e-27
97761	SGSM2	605.427	-1.81065	0.163716	-11.0597	1.96738e-28	3.09835e-27
13110	Cyp2j6	151.722	-3.17234	0.286865	-11.0586	1.99102e-28	3.13214e-27
171095	IL17RC	1011.3	-0.900471	0.0814334	-11.0578	2.01054e-28	3.15939e-27
56811	DKK2	643.583	12.0891	1.09344	11.056	2.05007e-28	3.21798e-27
67864	YIPF4	1412.15	-0.545555	0.0493699	-11.0504	2.18308e-28	3.42302e-27
74868	tmem65	3087.11	1.22224	0.110635	11.0475	2.2532e-28	3.52911e-27
217140	SCRN2	198.652	-1.82488	0.165297	-11.04	2.45017e-28	3.83343e-27
13018	CTCF	3532.65	0.51549	0.0466966	11.0391	2.47399e-28	3.86649e-27
213827	ARCN1	4889.19	0.486173	0.0440473	11.0375	2.51846e-28	3.9317e-27
80914	UCK2	2790.26	1.22133	0.110679	11.0349	2.59289e-28	4.0435e-27
27103	EIF2AK4	1162.55	0.898757	0.081458	11.0334	2.63765e-28	4.10883e-27
22339	VEGFA	3376.19	1.72789	0.156636	11.0312	2.7026e-28	4.20545e-27
219148	FAM167A	238.395	-11.328	1.02692	-11.0311	2.70684e-28	4.20747e-27
17850	MUT	787.769	-0.745952	0.0676564	-11.0256	2.87625e-28	4.46597e-27
20591	KDM5C	4532.7	-0.442496	0.0401537	-11.0201	3.05827e-28	4.74346e-27
71963	CDCA4	3136.24	0.9687	0.0879434	11.015	3.23396e-28	5.01054e-27
20724	SERPINB5	875.887	-11.7733	1.07064	-10.9964	3.97491e-28	6.15188e-27
192212	PROM2	504.819	-12.4099	1.12899	-10.9921	4.17174e-28	6.44956e-27
94112	MED15	2059.77	-0.711485	0.0647414	-10.9897	4.28578e-28	6.61874e-27
67155	SMARCA2	1008.81	1.34874	0.122798	10.9834	4.59237e-28	7.0846e-27
213603	SLC44A3	375.585	-11.262	1.02546	-10.9824	4.64474e-28	7.15768e-27
15040	H2-T23	109.063	-2.40866	0.219346	-10.9811	4.71175e-28	7.25316e-27
18602	PADI4	730.074	-11.4996	1.04733	-10.98	4.7701e-28	7.33511e-27
381259	TMEM237	904.524	-1.01966	0.0928798	-10.9783	4.86055e-28	7.4662e-27
75580	ZBTB4	1065.26	-1.24066	0.113025	-10.9769	4.93809e-28	7.57719e-27
53331	STX7	1550.74	-1.04918	0.0955999	-10.9747	5.05746e-28	7.75207e-27
76788	KLHDC10	2625.88	-0.576491	0.0525339	-10.9737	5.11353e-28	7.82965e-27
69833	POLR2F	1391.54	-0.817702	0.0746231	-10.9578	6.09894e-28	9.32852e-27
102623	#N/A	146.484	-8.17804	0.746341	-10.9575	6.11567e-28	9.34414e-27
12033	BCAP29	1162	0.726769	0.0663362	10.9558	6.22967e-28	9.50819e-27
230872	CROCC	239.241	1.18902	0.108544	10.9543	6.33661e-28	9.66114e-27
74123	FOXP4	2578.7	-0.646755	0.0590738	-10.9483	6.77377e-28	1.03167e-26
80297	SPTBN4	50.6928	3.20427	0.292956	10.9377	7.60913e-28	1.15767e-26
11732	ANK	25880.5	2.76466	0.252769	10.9375	7.62788e-28	1.15929e-26
77045	BCL7A	683.957	0.920899	0.0842068	10.9362	7.74084e-28	1.17521e-26
212307	MAPRE2	2125.07	0.570582	0.0521873	10.9333	7.98462e-28	1.21094e-26
12890	CPLX2	327.672	2.23164	0.204207	10.9283	8.44259e-28	1.27905e-26
269831	TSPAN12	237.271	-11.3197	1.03738	-10.9118	1.01226e-27	1.53195e-26
28193	REEP3	4804.43	-0.796811	0.0730445	-10.9086	1.04896e-27	1.58582e-26
236930	ercc6l	1883.5	0.625181	0.0573231	10.9063	1.07578e-27	1.62466e-26
244049	MCTP2	90.943	-5.28668	0.485073	-10.8987	1.16889e-27	1.76342e-26
227545	PROSER2	364.496	-1.99749	0.183301	-10.8973	1.18717e-27	1.78911e-26
380705	TMEM102	214.752	-11.1761	1.02593	-10.8936	1.2364e-27	1.86135e-26
17311	Kitl	3908.46	1.61034	0.147988	10.8816	1.41113e-27	2.12217e-26
17472	GBP4	71.2734	-5.10335	0.468995	-10.8815	1.41288e-27	2.12257e-26
170753	Zfp704	831.063	1.36575	0.125525	10.8803	1.43082e-27	2.14728e-26
14745	LPAR1	1600.9	2.62607	0.241501	10.874	1.53392e-27	2.29959e-26
18764	PKD2	3663.32	1.0415	0.0958313	10.868	1.63712e-27	2.45175e-26
99526	USP53	481.842	-0.82891	0.0762901	-10.8652	1.68781e-27	2.52503e-26
207474	Kctd12b	280.43	-5.77241	0.531574	-10.8591	1.80508e-27	2.69766e-26
22772	ZIC2	200.94	11.1317	1.02588	10.8508	1.97663e-27	2.95095e-26
14615	GJC1	864.333	6.11243	0.564194	10.8339	2.37728e-27	3.54541e-26
67099	METTL21A	483.982	0.912552	0.0842879	10.8266	2.57534e-27	3.8368e-26
232223	TXNRD3	586.571	1.39778	0.129344	10.8068	3.19791e-27	4.75938e-26
70717	MEDAG	106.544	5.27728	0.488663	10.7994	3.4629e-27	5.14841e-26
70310	PLSCR3	1790.11	-0.728343	0.0674494	-10.7984	3.50388e-27	5.20395e-26
11544	ADPRH	1104.61	1.04778	0.097105	10.7902	3.83047e-27	5.68312e-26
107358	TM9SF3	11846.6	-0.357012	0.0330901	-10.7891	3.87583e-27	5.74448e-26
18685	PHTF1	1434.55	-0.637632	0.0591253	-10.7844	4.07843e-27	6.03851e-26
22634	PLAGL1	221.049	2.09866	0.194624	10.7831	4.13527e-27	6.11636e-26
232286	TMF1	2940.91	0.734947	0.0682107	10.7747	4.53453e-27	6.69999e-26
69674	MIF4GD	312.335	-1.27839	0.11867	-10.7727	4.63119e-27	6.83577e-26
16423	CD47	4035.64	-2.20798	0.204974	-10.772	4.6673e-27	6.88199e-26
14238	FOXF2	290.894	3.32032	0.30836	10.7677	4.89233e-27	7.20639e-26
66938	SH3D21	59.665	-3.36561	0.312656	-10.7646	5.05948e-27	7.44495e-26
76800	USP42	835.475	0.742412	0.0689975	10.76	5.3181e-27	7.8175e-26
545886	Gm5886	191.225	11.0598	1.02848	10.7535	5.70356e-27	8.36876e-26
225791	ZADH2	3015.15	0.882302	0.0820478	10.7535	5.70478e-27	8.36876e-26
16206	LRIG1	9545	0.4971	0.0462594	10.7459	6.19354e-27	9.07648e-26
26441	PSMA4	1492.16	0.626103	0.0583119	10.7372	6.81137e-27	9.97171e-26
231642	ALKBH2	109.31	-2.99101	0.278674	-10.733	7.12488e-27	1.042e-25
227580	C1QL3	165.644	-6.09144	0.567616	-10.7316	7.23181e-27	1.05657e-25
74895	CCDC181	232.29	-1.54313	0.143842	-10.728	7.52398e-27	1.09813e-25
21885	TLE1	1158.9	1.14837	0.107146	10.7179	8.39282e-27	1.2237e-25
67281	RPL37	1550.89	1.06988	0.0998635	10.7135	8.7998e-27	1.28173e-25
224022	SLC7A4	96.1995	-4.01018	0.374404	-10.7108	9.05447e-27	1.31749e-25
58894	Zfp862-ps	741.788	0.95005	0.0887307	10.7071	9.426e-27	1.37016e-25
100043468	Zfp955b	390.462	1.21407	0.113416	10.7046	9.68599e-27	1.40653e-25
110958	m1ap	181.668	-3.84163	0.358919	-10.7033	9.81734e-27	1.42416e-25
20660	SORL1	444.893	-10.7881	1.00805	-10.702	9.9611e-27	1.44355e-25
67452	PNPLA8	1440.21	0.768577	0.0718395	10.6985	1.03415e-26	1.49716e-25
18023	NFE2L1	10838.3	-0.338992	0.0317396	-10.6804	1.25703e-26	1.81801e-25
171170	MBNL3	1512.58	-1.76592	0.165412	-10.6758	1.32056e-26	1.90797e-25
20564	SLIT3	176.585	6.21879	0.582522	10.6756	1.32361e-26	1.91045e-25
50868	KEAP1	1961.9	0.484355	0.0453856	10.672	1.37609e-26	1.9842e-25
21946	PGLYRP1	749.808	-12.2588	1.14884	-10.6705	1.39802e-26	2.0138e-25
235442	RAB8B	1703.33	2.06398	0.193442	10.6698	1.40965e-26	2.02851e-25
11746	ANXA4	5269.95	-0.923925	0.0866018	-10.6687	1.42679e-26	2.05112e-25
625249	GPX4	494.492	-0.934623	0.0877471	-10.6513	1.71902e-26	2.46874e-25
102414	CLK3	1312.94	0.660494	0.0620314	10.6477	1.78647e-26	2.56305e-25
68731	RBFA	616.059	-0.768369	0.0721654	-10.6473	1.79447e-26	2.57196e-25
230972	ARHGEF16	206.59	-9.09934	0.855786	-10.6327	2.09877e-26	3.00509e-25
71774	SHROOM1	388.181	-1.6409	0.154383	-10.6288	2.18955e-26	3.13196e-25
13032	CTSC	340.62	-11.8418	1.11422	-10.6279	2.20936e-26	3.15714e-25
219140	SPATA13	317.559	1.89291	0.178124	10.6269	2.2344e-26	3.18975e-25
18019	NFATC2	214.286	-7.59022	0.714666	-10.6207	2.38874e-26	3.40668e-25
116870	MTA1	4479.52	0.975813	0.0919186	10.6161	2.50929e-26	3.57505e-25
22042	TFRC	14323.1	-0.936481	0.0882595	-10.6105	2.66236e-26	3.78937e-25
23943	ESYT1	1859.88	-1.96441	0.185225	-10.6055	2.80819e-26	3.99298e-25
239528	AGO2	6154.26	1.03556	0.097693	10.6001	2.97598e-26	4.22736e-25
17761	MAP7	284.275	-10.8599	1.0252	-10.593	3.21231e-26	4.55855e-25
14451	GAS1	1214.83	4.80305	0.454126	10.5765	3.8307e-26	5.43074e-25
69226	SNX24	344.51	-1.11339	0.105299	-10.5736	3.94953e-26	5.59368e-25
11768	AP1M2	139.746	-8.11154	0.767597	-10.5674	4.21814e-26	5.96821e-25
18025	nfe2l3	148.736	-7.4067	0.701155	-10.5636	4.39666e-26	6.21467e-25
106052	FBXO4	758.197	1.06097	0.100493	10.5576	4.68629e-26	6.61754e-25
17772	MTM1	294.798	-1.8023	0.170854	-10.5488	5.14491e-26	7.25802e-25
66060	CYSTM1	416.447	-3.81558	0.361717	-10.5485	5.16016e-26	7.27237e-25
226525	RASAL2	2247.52	-1.09653	0.104027	-10.5408	5.60375e-26	7.8898e-25
22592	ERCC5	1024.79	-0.884023	0.0839059	-10.5359	5.90281e-26	8.30271e-25
12394	RUNX1	3178.07	-0.99883	0.0948658	-10.5289	6.35899e-26	8.9356e-25
20465	SIM2	58.5382	-4.33111	0.411681	-10.5206	6.94661e-26	9.75176e-25
623230	TMEM200B	272.765	9.55555	0.908365	10.5195	7.0243e-26	9.85118e-25
12364	CASP12	452.458	-1.28496	0.122177	-10.5171	7.20325e-26	1.00923e-24
57278	bcam	57.5764	-5.82462	0.554389	-10.5064	8.07349e-26	1.13005e-24
83701	SRRT	5628.9	0.365818	0.0348267	10.504	8.28254e-26	1.15818e-24
13197	GADD45A	527.524	-1.213	0.115546	-10.498	8.8247e-26	1.23279e-24
14062	F2R	4236.19	1.58276	0.150846	10.4925	9.34934e-26	1.30481e-24
64704	HTRA2	2331.77	0.737355	0.0703046	10.488	9.80698e-26	1.36735e-24
56338	TXNIP	1102.67	-2.64313	0.252097	-10.4846	1.01703e-25	1.41663e-24
19357	RAD21	16034.8	1.02585	0.097859	10.4829	1.03496e-25	1.44021e-24
231832	TMEM184A	135.793	-8.07531	0.770347	-10.4827	1.03752e-25	1.44238e-24
21419	TFAP2B	398.133	-12.067	1.15204	-10.4744	1.13202e-25	1.57223e-24
13056	CYB561	584.368	-5.74037	0.548196	-10.4714	1.16934e-25	1.62249e-24
194590	REPS2	107.869	-4.48152	0.428036	-10.47	1.18692e-25	1.64528e-24
12985	CSF3	829.209	-2.58777	0.247511	-10.4552	1.38748e-25	1.92145e-24
26919	Zfp346	1031.24	0.872771	0.0834996	10.4524	1.42865e-25	1.97656e-24
76448	PPP1R18	3786.37	0.445191	0.042608	10.4485	1.48806e-25	2.05676e-24
69717	Gm10499	471.808	-1.94576	0.186313	-10.4435	1.5694e-25	2.1671e-24
216438	41706	264.008	-2.64189	0.252995	-10.4425	1.58617e-25	2.18816e-24
19885	rorc	167.786	-10.8215	1.03645	-10.4409	1.6135e-25	2.22372e-24
231712	TRAFD1	646.012	-0.921331	0.0882819	-10.4362	1.69381e-25	2.33215e-24
66659	ACP6	514.921	-1.20784	0.115759	-10.4341	1.73278e-25	2.38353e-24
73296	RHOBTB3	3587.53	1.28303	0.122967	10.4339	1.73537e-25	2.38481e-24
21912	TSPAN7	559.015	-12.5567	1.20362	-10.4324	1.76331e-25	2.42088e-24
68070	PDZD2	121.074	4.76649	0.456898	10.4323	1.76608e-25	2.42237e-24
17536	MEIS2	488.245	2.09541	0.200887	10.4308	1.79389e-25	2.45816e-24
17281	FYCO1	891.434	0.739594	0.0709574	10.4231	1.94582e-25	2.66381e-24
52538	ACAA2	891.12	-0.716134	0.06873	-10.4195	2.01949e-25	2.76203e-24
109264	ME3	107.21	-4.6734	0.448532	-10.4193	2.02397e-25	2.76552e-24
214459	FNBP1L	4334.64	-1.32649	0.127358	-10.4155	2.10752e-25	2.87694e-24
242505	RASEF	170.191	-10.8419	1.04141	-10.4108	2.21418e-25	3.01966e-24
16572	KIF5A	80.9709	-2.66356	0.255972	-10.4056	2.33697e-25	3.18112e-24
77305	WDR82	3690.44	0.579556	0.0556964	10.4056	2.33701e-25	3.18112e-24
20527	SLC2A3	97.7871	5.73278	0.551022	10.4039	2.37967e-25	3.23613e-24
54427	DNMT3L	69.8144	6.56788	0.631547	10.3997	2.48765e-25	3.37976e-24
170762	NUP155	6044.18	0.851857	0.0819186	10.3988	2.51026e-25	3.40725e-24
23947	MID2	1120.21	-2.55633	0.245836	-10.3985	2.5182e-25	3.41481e-24
105245	TXNDC5	9588.08	1.13487	0.109164	10.396	2.58471e-25	3.50169e-24
76560	PRSS8	156.087	-10.7171	1.03103	-10.3945	2.62627e-25	3.55463e-24
29858	PMM1	1049.1	-1.36842	0.131653	-10.3942	2.63527e-25	3.56346e-24
213056	FAM126B	809.458	-1.76392	0.169733	-10.3923	2.68713e-25	3.63015e-24
17121	MXD3	269.43	1.21375	0.116806	10.3911	2.72114e-25	3.67264e-24
142682	ZCCHC14	4227.14	1.27697	0.122957	10.3855	2.8875e-25	3.89351e-24
11433	ACP5	265.727	-6.70229	0.645649	-10.3807	3.0354e-25	4.0891e-24
74762	MDGA1	65.383	3.31256	0.319121	10.3803	3.04955e-25	4.10431e-24
234740	TMEM231	241.077	-1.06946	0.103054	-10.3776	3.13562e-25	4.21618e-24
100041680	Gm3470	59.3786	4.41623	0.425904	10.3691	3.42783e-25	4.60479e-24
54200	SULT2B1	167.953	-4.21009	0.406057	-10.3682	3.45875e-25	4.64198e-24
70675	VCPIP1	2360.7	-0.507405	0.048963	-10.363	3.65186e-25	4.89657e-24
58809	RNASE4	267.306	1.62076	0.156426	10.3612	3.72218e-25	4.9862e-24
242585	SLC35D1	562.073	1.03276	0.0996932	10.3594	3.79452e-25	5.07835e-24
56417	ADAR	1756.15	-0.913446	0.0882412	-10.3517	4.11159e-25	5.49758e-24
74048	Vsir	156.766	-4.65605	0.449898	-10.3491	4.22386e-25	5.64243e-24
116871	mta3	988.82	-0.981159	0.0948537	-10.3439	4.45901e-25	5.95102e-24
230967	CEP104	1098.7	0.794068	0.0767748	10.3428	4.51076e-25	6.01449e-24
75553	ZC3H14	3957.4	0.565608	0.0547001	10.3402	4.63765e-25	6.17793e-24
68964	CTC1	1578.19	-0.599239	0.0579595	-10.3389	4.69835e-25	6.25299e-24
231293	CWH43	225.469	-11.2464	1.08813	-10.3355	4.86786e-25	6.47259e-24
320405	CADPS2	309.317	-10.9806	1.06298	-10.33	5.15442e-25	6.84727e-24
72778	DNAJC22	203.679	-4.91267	0.475768	-10.3258	5.38784e-25	7.15073e-24
67515	TTC33	800.123	1.23751	0.119868	10.324	5.48922e-25	7.27854e-24
117592	B3GALT6	485.312	1.64385	0.159333	10.3171	5.89986e-25	7.81582e-24
71529	KAZN	223.768	-11.2354	1.08915	-10.3158	5.97857e-25	7.91278e-24
75991	SLAIN2	2956.99	0.445135	0.0431653	10.3123	6.19737e-25	8.19481e-24
11459	ACTA1	444.544	-6.23061	0.60442	-10.3084	6.45592e-25	8.52883e-24
18018	NFATC1	976.304	-0.970563	0.0941833	-10.305	6.68602e-25	8.82468e-24
107242	AI837181	1607.72	0.678696	0.0658809	10.3019	6.91182e-25	9.11433e-24
70445	CD248	612.537	6.98254	0.678149	10.2965	7.30938e-25	9.62973e-24
208884	ZDHHC9	1149.54	-0.812803	0.0789429	-10.2961	7.33801e-25	9.65858e-24
100861925	#N/A	340.495	-10.4023	1.01097	-10.2894	7.86684e-25	1.03451e-23
11856	ARHGAP6	524.678	-4.15949	0.404254	-10.2893	7.87523e-25	1.03467e-23
544817	ARHGAP27	1095.78	-4.52591	0.439937	-10.2876	8.01146e-25	1.0516e-23
234311	DDX60	97.0946	-2.56791	0.249687	-10.2845	8.27369e-25	1.08503e-23
12363	CASP4	132.72	-3.02092	0.293809	-10.2819	8.50301e-25	1.11409e-23
20707	Serpinb9c	60.2458	-5.88253	0.572472	-10.2757	9.07177e-25	1.18752e-23
73442	HSPA12A	232.384	2.92702	0.284974	10.2712	9.50425e-25	1.243e-23
170833	HOOK2	786.244	-2.0834	0.202878	-10.2692	9.7013e-25	1.26702e-23
114301	PALMD	146.201	-10.6213	1.0343	-10.2692	9.70554e-25	1.26702e-23
242700	IFNLR1	140.398	-10.5643	1.02904	-10.2661	1.00139e-24	1.30608e-23
100504231	Gm15708	110.963	3.90996	0.380919	10.2646	1.01775e-24	1.32622e-23
14284	FOSL2	6756.05	1.48567	0.144858	10.256	1.11188e-24	1.44757e-23
67425	EPS8L1	137.929	-10.5377	1.02773	-10.2533	1.14326e-24	1.48706e-23
69574	CMBL	45.2777	-4.17468	0.407209	-10.2519	1.16004e-24	1.50752e-23
69719	CAD	9087.85	0.703779	0.0687333	10.2393	1.32234e-24	1.71689e-23
67122	NRARP	59.5514	-3.98962	0.38978	-10.2356	1.37384e-24	1.78214e-23
216835	USP43	88.4893	-6.45044	0.630267	-10.2345	1.38981e-24	1.80123e-23
20744	STRBP	1160.8	-1.29719	0.126798	-10.2304	1.44951e-24	1.87691e-23
107581	COL16A1	3809.79	2.33646	0.228451	10.2274	1.49478e-24	1.93378e-23
20509	SLC19A1	1468.99	1.02207	0.0999527	10.2255	1.52398e-24	1.96977e-23
70415	STK26	142.864	-10.5893	1.03571	-10.2242	1.54479e-24	1.99488e-23
76252	ATP6V0E2	357.716	-3.47388	0.339906	-10.2201	1.61113e-24	2.07867e-23
57377	MOGS	2291.3	1.55333	0.152068	10.2147	1.70331e-24	2.19563e-23
18974	POLE2	856.569	0.956878	0.0937308	10.2088	1.8112e-24	2.33261e-23
276770	EIF5A	19091.1	0.386995	0.0379382	10.2007	1.96904e-24	2.53361e-23
108012	AP1S2	623.847	-1.07685	0.105632	-10.1944	2.10062e-24	2.70051e-23
56248	AK3	1130.05	-3.11416	0.305514	-10.1932	2.12706e-24	2.73204e-23
16150	IKBKB	1469.78	-0.698324	0.0685653	-10.1848	2.31849e-24	2.97526e-23
67846	TMEM39A	780.842	0.844955	0.0829974	10.1805	2.42335e-24	3.10705e-23
231287	ATP10D	1380.71	1.74684	0.171595	10.18	2.43562e-24	3.11999e-23
12759	CLU	3709.94	-3.44029	0.338096	-10.1755	2.55113e-24	3.26504e-23
56447	COPZ1	2118.86	-1.07095	0.105251	-10.1752	2.55796e-24	3.27087e-23
22027	HSP90B1	31091.9	0.364888	0.0358668	10.1734	2.6061e-24	3.32945e-23
68667	TRPM4	487	-1.70466	0.167581	-10.1721	2.64116e-24	3.37124e-23
12903	CRABP1	1864.62	13.624	1.33958	10.1703	2.68996e-24	3.43047e-23
114774	PAWR	1244.53	-1.73099	0.170262	-10.1666	2.79447e-24	3.56059e-23
72789	VEPH1	96.9067	-3.04363	0.299401	-10.1658	2.81917e-24	3.58888e-23
215015	FAM20B	2932.79	-0.525275	0.0516909	-10.1619	2.93431e-24	3.73214e-23
20349	SEMA3E	1017.05	-3.15858	0.310887	-10.1599	2.99369e-24	3.80429e-23
235320	ZBTB16	303.728	-10.2353	1.00751	-10.1589	3.02363e-24	3.83894e-23
57783	TNIP1	1128.54	-0.800435	0.0787944	-10.1585	3.03613e-24	3.85141e-23
81879	TFCP2L1	381.307	-8.98439	0.884524	-10.1573	3.07447e-24	3.89659e-23
103266	TMEM263	1500.16	0.958265	0.0943703	10.1543	3.17038e-24	4.01461e-23
232430	CREBL2	261.499	-1.75229	0.172657	-10.149	3.34811e-24	4.23593e-23
70380	MOSPD1	327.329	-1.07956	0.106385	-10.1477	3.39205e-24	4.28773e-23
11676	ALDOC	117.631	-4.72389	0.465688	-10.1439	3.52761e-24	4.45516e-23
319859	E030011O05Rik	238.611	-1.79698	0.177234	-10.139	3.70698e-24	4.67757e-23
107029	ME2	2687.31	0.693979	0.0684589	10.1372	3.77951e-24	4.76491e-23
13537	DUSP2	156.449	7.33316	0.72348	10.136	3.82625e-24	4.81959e-23
53791	TLR5	134.577	-10.5011	1.03616	-10.1346	3.88012e-24	4.88317e-23
14228	FKBP4	6718.69	0.759281	0.0749546	10.1299	4.07183e-24	5.11995e-23
21810	TGFBI	217.447	4.5243	0.44668	10.1287	4.11971e-24	5.17561e-23
246730	Oas1a	134.508	-3.03787	0.299996	-10.1264	4.22047e-24	5.29755e-23
52815	LDHD	74.6772	-6.87507	0.678994	-10.1254	4.26331e-24	5.34665e-23
243374	GIMAP8	132.741	-10.4833	1.0357	-10.1219	4.41777e-24	5.53552e-23
56736	RNF14	2628.61	-0.714408	0.0705859	-10.1211	4.45315e-24	5.57498e-23
22401	ZMAT3	4298.48	-0.917891	0.0907235	-10.1174	4.62304e-24	5.78263e-23
14462	GATA3	2065.95	-1.046	0.103413	-10.1148	4.74887e-24	5.93484e-23
230766	FAM167B	149.067	10.7008	1.0585	10.1093	5.02293e-24	6.27188e-23
69065	CHAC1	762.807	0.871872	0.0862488	10.1088	5.04941e-24	6.29947e-23
69554	KLHDC2	2881.97	0.658754	0.0651721	10.1079	5.09543e-24	6.35136e-23
329260	DENND1B	915.836	-1.19062	0.117796	-10.1075	5.117e-24	6.37271e-23
214895	LMAN2L	325.809	-1.25762	0.124485	-10.1026	5.3802e-24	6.69468e-23
52502	CARHSP1	2939.58	-0.682081	0.0675416	-10.0987	5.59915e-24	6.96109e-23
67729	mansc1	190.677	-11.0057	1.08994	-10.0975	5.66737e-24	7.03981e-23
12297	CACNB3	1377.2	-0.734352	0.0727867	-10.0891	6.17323e-24	7.66153e-23
12554	CDH13	153.935	-10.6953	1.06022	-10.0878	6.25573e-24	7.75722e-23
103012	Firre	670.477	-2.20402	0.218781	-10.0741	7.19139e-24	8.90975e-23
55942	SERTAD1	1171.28	0.670346	0.0665579	10.0716	7.37513e-24	9.12951e-23
414084	TNIP3	229.834	-11.2741	1.11961	-10.0696	7.52536e-24	9.30744e-23
317758	Gimap9	135.407	-8.48653	0.842926	-10.0679	7.65717e-24	9.46231e-23
215436	SLC35E3	758.674	-1.15772	0.115002	-10.067	7.72946e-24	9.54342e-23
80880	KANK3	87.3712	-2.24543	0.223099	-10.0647	7.91088e-24	9.75902e-23
106582	NRM	395.119	1.19086	0.118391	10.0587	8.41228e-24	1.03686e-22
320982	ARL4C	3864.85	-2.57222	0.255796	-10.0557	8.66746e-24	1.0674e-22
52348	VPS37A	1854.8	-0.890004	0.088516	-10.0547	8.75698e-24	1.0775e-22
16776	LAMA5	8274.48	-5.03729	0.50118	-10.0509	9.10709e-24	1.11962e-22
98660	ATP1A2	212.774	-11.1628	1.111	-10.0476	9.4151e-24	1.15649e-22
217882	CEP170B	10156.2	-0.979045	0.0974484	-10.0468	9.48994e-24	1.16469e-22
381314	iars2	3444.7	-0.432073	0.0430222	-10.043	9.86101e-24	1.2092e-22
18188	NRTN	43.0553	-3.86318	0.384702	-10.042	9.96215e-24	1.22056e-22
76952	NT5C2	1505.21	-1.41893	0.141364	-10.0374	1.04361e-23	1.27753e-22
22761	ZFPM1	731.807	-1.56727	0.156215	-10.0328	1.09387e-23	1.33791e-22
55963	SLC1A4	2167.33	1.10229	0.109931	10.0271	1.15817e-23	1.41535e-22
20271	SCN5A	140.179	-10.5604	1.05324	-10.0265	1.16535e-23	1.42292e-22
11363	ACADL	4335.28	-1.34213	0.133966	-10.0184	1.26483e-23	1.54307e-22
16391	IRF9	323.664	-1.72496	0.172182	-10.0182	1.26764e-23	1.54518e-22
71653	SHTN1	843.68	-1.82809	0.182549	-10.0142	1.31976e-23	1.60735e-22
232288	FRMD4B	284.919	-3.6159	0.361295	-10.0082	1.40321e-23	1.70753e-22
215632	PSD4	286.337	-10.1521	1.01548	-9.99734	1.56549e-23	1.9034e-22
236312	Ifi209	54.5224	-3.97115	0.397699	-9.98531	1.76744e-23	2.14712e-22
21682	TEC	248.663	-2.14271	0.214681	-9.98093	1.84727e-23	2.24219e-22
66274	LYRM9	210.672	-1.17356	0.117602	-9.9791	1.88174e-23	2.2821e-22
14635	GALK1	1633.79	0.973196	0.0975429	9.9771	1.9199e-23	2.32642e-22
12837	COL8A1	8048.24	1.24715	0.125056	9.97276	2.00586e-23	2.42853e-22
217169	TNS4	1962.49	-4.75441	0.47676	-9.97233	2.01454e-23	2.43698e-22
69073	KDF1	116.497	-10.2928	1.03238	-9.96999	2.06246e-23	2.49285e-22
13797	EMX2	81.4923	7.37973	0.740503	9.96583	2.15063e-23	2.59723e-22
16859	lgals9	1728.23	-2.01426	0.202176	-9.96289	2.21536e-23	2.67315e-22
80794	CBLC	183.623	-10.2293	1.02795	-9.95113	2.49338e-23	3.00609e-22
23999	TWF2	643.155	0.943213	0.094829	9.94647	2.61297e-23	3.14763e-22
14964	H2-D1	16323	-1.58928	0.159794	-9.94582	2.63008e-23	3.16559e-22
24051	SGCB	626.878	-1.40797	0.141606	-9.94288	2.70868e-23	3.25746e-22
70450	UNC13D	770.778	-5.00056	0.503318	-9.9352	2.92579e-23	3.51561e-22
140792	COLEC12	2198.94	2.15427	0.216898	9.93217	3.0161e-23	3.62108e-22
74153	uba7	51.1217	-3.6473	0.367254	-9.93128	3.04317e-23	3.65053e-22
18034	NFKB2	2852.38	-0.731318	0.0736757	-9.92617	3.20308e-23	3.83915e-22
71458	BCOR	1315.15	1.07012	0.107824	9.92465	3.25245e-23	3.89507e-22
19108	PRKX	1640.12	-0.944871	0.0952156	-9.92349	3.2903e-23	3.93711e-22
243659	STYK1	263.822	-2.05122	0.206958	-9.91129	3.7181e-23	4.4453e-22
100043172	Gm10080	809.078	-0.716385	0.0723762	-9.89808	4.24353e-23	5.06927e-22
54373	PRSS16	63.421	-3.27991	0.33144	-9.89593	4.33553e-23	5.17486e-22
29876	CLIC4	9138.01	1.50569	0.152382	9.88106	5.02972e-23	5.99845e-22
116848	BAZ2A	2862.56	-0.630233	0.0638037	-9.87768	5.20243e-23	6.19927e-22
17246	MDM2	7173.81	-1.3195	0.13359	-9.87721	5.22679e-23	6.22313e-22
20588	SMARCC1	6008.05	0.571829	0.0579103	9.87439	5.3758e-23	6.39524e-22
96979	PTGES2	797.849	-0.781474	0.0791515	-9.87315	5.44302e-23	6.46984e-22
17768	mthfd2	3628.9	1.56498	0.158574	9.86905	5.67003e-23	6.7341e-22
99887	TMEM56	72.3935	-3.10804	0.314947	-9.86846	5.7031e-23	6.76778e-22
17283	MEN1	1622.66	0.774465	0.0785094	9.86461	5.92616e-23	7.02667e-22
13710	ELF3	106.608	-10.165	1.03195	-9.8503	6.83376e-23	8.09611e-22
170721	PAPLN	65.3174	-5.65506	0.57414	-9.84961	6.88137e-23	8.14579e-22
211949	SPSB4	87.5792	-2.67471	0.271558	-9.84951	6.88783e-23	8.14672e-22
192197	BCAS3	389.573	-1.00269	0.101818	-9.8479	6.99918e-23	8.27161e-22
105439	SLAIN1	173.492	-10.8695	1.10383	-9.84705	7.05833e-23	8.33463e-22
432530	ADCY1	278.35	-10.8292	1.09993	-9.84536	7.17798e-23	8.46896e-22
53857	TUBA8	155.988	-10.7147	1.08936	-9.83575	7.89806e-23	9.31088e-22
12864	COX6C	1629.48	0.713108	0.0726052	9.82172	9.07825e-23	1.06934e-21
17112	TM4SF1	14125.6	1.35407	0.137891	9.81988	9.24577e-23	1.08818e-21
52840	DBNDD2	604.666	-0.984168	0.100291	-9.81308	9.89072e-23	1.16313e-21
231440	PARM1	248.395	-10.664	1.08689	-9.8115	1.00466e-22	1.1805e-21
71365	PDSS2	478.716	1.00988	0.102929	9.81139	1.00578e-22	1.18085e-21
68023	PDF	588.124	0.973944	0.0992707	9.81099	1.00971e-22	1.18449e-21
232313	GXYLT2	543.479	1.95875	0.19973	9.80697	1.05081e-22	1.2317e-21
329628	FAT4	4140.03	2.40078	0.244822	9.80623	1.05847e-22	1.23967e-21
236573	Gbp9	298.313	-4.41673	0.450496	-9.80414	1.08062e-22	1.26457e-21
227541	CAMK1D	1014.99	2.49703	0.254726	9.80281	1.09497e-22	1.28033e-21
17002	LTF	269.594	-10.7823	1.10008	-9.80131	1.11137e-22	1.29843e-21
73608	MARVELD3	185.641	-10.2452	1.04531	-9.80113	1.11331e-22	1.29965e-21
105298	EPDR1	745.336	2.51145	0.256244	9.80099	1.11492e-22	1.30047e-21
71675	0610010F05Rik	1372.79	-0.867741	0.0885634	-9.79797	1.1487e-22	1.33879e-21
105014	rdh14	467.261	0.961684	0.0981551	9.7976	1.15296e-22	1.34265e-21
333433	GPD1L	1182.65	-0.983356	0.100377	-9.79665	1.16381e-22	1.3542e-21
54651	USP27X	321.742	-1.65016	0.168514	-9.79242	1.2136e-22	1.41099e-21
239570	TTC38	113.377	-5.79792	0.592149	-9.79131	1.22691e-22	1.4253e-21
380863	TMEM171	84.1637	-3.9524	0.40372	-9.78994	1.24375e-22	1.4437e-21
26932	PPP2R5E	2802.76	0.386634	0.0395033	9.78738	1.27554e-22	1.4794e-21
68299	VPS53	1246.59	-0.654878	0.0669192	-9.78609	1.29193e-22	1.4972e-21
15903	ID3	3420.22	1.4997	0.153285	9.78374	1.32235e-22	1.53121e-21
16341	EIF3E	3535.48	1.18097	0.120727	9.78211	1.34376e-22	1.55475e-21
17268	MEIS1	134.001	1.89117	0.193366	9.78028	1.36825e-22	1.58181e-21
70297	GCC2	1441.56	-0.596481	0.0609947	-9.77923	1.3826e-22	1.59712e-21
327959	XAF1	138.544	-3.12112	0.319177	-9.77865	1.39053e-22	1.60498e-21
14365	FZD3	105.704	-10.1553	1.03992	-9.76547	1.58383e-22	1.82662e-21
235086	IGSF9B	101.346	-10.093	1.03426	-9.75864	1.69419e-22	1.95234e-21
12465	CCT5	20414.4	0.992155	0.101723	9.75352	1.78187e-22	2.05172e-21
20568	SLPI	4059.94	-2.01658	0.206779	-9.75238	1.80193e-22	2.07316e-21
208659	FAM20A	76.8748	-4.25865	0.436889	-9.74768	1.88736e-22	2.16971e-21
21871	ATP6V0A2	2590.49	-0.668312	0.0685905	-9.74351	1.96651e-22	2.25888e-21
74747	DDIT4	899.156	-1.36879	0.140555	-9.73843	2.06721e-22	2.37266e-21
269180	INPP4A	409.023	-1.11376	0.114408	-9.73494	2.13946e-22	2.45362e-21
29810	BAG3	3826.14	1.09193	0.112187	9.73305	2.17948e-22	2.49752e-21
228608	SMOX	1117.43	-2.13847	0.219778	-9.73014	2.24282e-22	2.56805e-21
101602	AI467606	40.8849	4.14865	0.426476	9.72775	2.29619e-22	2.62707e-21
12488	CD2AP	3150.29	-0.53544	0.0550472	-9.72692	2.31495e-22	2.64642e-21
72042	COTL1	3489.72	-3.48678	0.358535	-9.7251	2.35677e-22	2.69209e-21
12029	BCL6B	218.745	10.532	1.08357	9.7197	2.48505e-22	2.83636e-21
15372	HMX2	74.0142	7.2463	0.745691	9.71757	2.53765e-22	2.89409e-21
20848	STAT3	3450.56	-0.437584	0.0450345	-9.71665	2.56061e-22	2.91795e-21
217737	AHSA1	4746.01	0.773388	0.079602	9.71568	2.58519e-22	2.94363e-21
19345	RAB5C	4998.91	-0.379197	0.0390335	-9.71467	2.61093e-22	2.97057e-21
213081	WDR19	304.678	-1.19344	0.122898	-9.71083	2.71121e-22	3.08222e-21
18053	NGFR	168.612	-10.8282	1.11594	-9.70316	2.92289e-22	3.32025e-21
319468	PPM1H	550.918	-2.44729	0.252259	-9.70147	2.97188e-22	3.37323e-21
171212	GALNT10	3007	-1.10882	0.114303	-9.70079	2.99182e-22	3.39317e-21
320679	SAMD12	44.1749	-2.92414	0.301645	-9.69395	3.199e-22	3.62528e-21
74488	LRRC15	47.8322	4.24874	0.438326	9.69309	3.22602e-22	3.65302e-21
269589	SYTL1	78.4495	-4.31441	0.44515	-9.69204	3.25951e-22	3.68803e-21
17231	Mcpt8	96.5401	-10.0243	1.03438	-9.69111	3.28945e-22	3.71897e-21
51786	CPSF2	4921.23	0.73488	0.075846	9.68911	3.3545e-22	3.78953e-21
474332	DNM3OS	139.666	10.6066	1.09572	9.67997	3.66824e-22	4.1407e-21
381463	nr1h5	696.77	-1.36324	0.140899	-9.67534	3.83802e-22	4.32893e-21
18674	SLC25A3	14608.7	-0.37799	0.0390718	-9.67423	3.87986e-22	4.37269e-21
319713	ABLIM3	210.083	-9.11374	0.942201	-9.67282	3.93377e-22	4.42996e-21
20556	Slfn2	290.263	-10.1684	1.0516	-9.66947	4.06485e-22	4.57399e-21
98402	SH3BP4	2091.43	-1.33183	0.13784	-9.66211	4.3677e-22	4.91092e-21
102162	TAF5L	1348.67	0.589504	0.0610198	9.66088	4.42063e-22	4.96655e-21
107272	PSAT1	9386.26	0.81445	0.0843072	9.66051	4.43659e-22	4.98058e-21
667977	Gm8909	524.157	-1.6095	0.166611	-9.66026	4.44725e-22	4.98864e-21
19946	RPL30	173.991	1.29395	0.13395	9.65991	4.46271e-22	5.00207e-21
72000	LMNTD2	37.5568	-3.9649	0.410675	-9.65459	4.70039e-22	5.26217e-21
17126	SMAD2	2286.92	-0.428083	0.04434	-9.65455	4.7021e-22	5.26217e-21
78593	NRIP3	48.4664	-5.55549	0.575861	-9.64726	5.04844e-22	5.64536e-21
76901	JADE2	2700.14	-2.1343	0.221297	-9.64452	5.18548e-22	5.7924e-21
50528	TMPRSS2	92.3981	-9.96117	1.03284	-9.64447	5.18801e-22	5.7924e-21
30056	TIMM9	788.84	0.828039	0.0859514	9.6338	5.75633e-22	6.42193e-21
76740	EFR3A	7227.1	1.09588	0.113849	9.62571	6.22755e-22	6.94225e-21
67703	KIRREL3	152.525	-9.95928	1.03573	-9.61571	6.86374e-22	7.6455e-21
104776	ALDH6A1	167.233	-1.27487	0.132656	-9.61033	7.23171e-22	8.04913e-21
234356	CSGALNACT1	550.248	2.50425	0.260684	9.60645	7.50961e-22	8.35196e-21
93715	PCDHGA7	110.751	-8.18988	0.852721	-9.60441	7.65987e-22	8.51249e-21
278279	TMTC2	99.4074	-10.0641	1.04843	-9.59916	8.06e-22	8.95022e-21
22750	Zfp9	522.336	1.47455	0.153642	9.59729	8.20778e-22	9.10727e-21
54610	TBC1D8	143.664	-4.60715	0.480133	-9.59557	8.34542e-22	9.25284e-21
53381	PRDX4	1900.12	0.727804	0.075911	9.58759	9.01622e-22	9.98886e-21
12539	CDC37	6246.68	0.415926	0.0433871	9.58638	9.12255e-22	1.00989e-20
14786	GRB7	145.306	-9.89163	1.03199	-9.58501	9.24455e-22	1.0226e-20
68036	Zfp706	3682.88	0.623823	0.0650858	9.58463	9.27936e-22	1.02566e-20
78088	SOWAHB	116.371	-10.2936	1.07436	-9.58122	9.59053e-22	1.05924e-20
71729	RGS12	1349.71	-1.73879	0.181538	-9.57813	9.88214e-22	1.09061e-20
20439	SIAH2	696	0.908449	0.0948561	9.57714	9.97717e-22	1.10025e-20
224079	ATP13A4	963.6	-5.11054	0.533867	-9.57268	1.04165e-21	1.14782e-20
54394	CRLF3	1226.93	0.882154	0.0921695	9.57099	1.05884e-21	1.16587e-20
67573	LOXL4	2252.22	-1.38386	0.144608	-9.56974	1.07176e-21	1.17918e-20
74012	RAP2B	1809.67	-0.657165	0.0687089	-9.56448	1.12766e-21	1.23974e-20
66912	BZW2	3724.49	1.58205	0.16542	9.56385	1.13453e-21	1.24633e-20
18559	PCTP	137.361	-1.46538	0.153322	-9.55748	1.20656e-21	1.32445e-20
70348	Ube2cbp	233.115	1.07539	0.112571	9.55294	1.26062e-21	1.38274e-20
68943	PINK1	431.246	-0.858066	0.0898438	-9.55064	1.28896e-21	1.41273e-20
223435	TRIO	7542.66	0.846039	0.088595	9.54952	1.30301e-21	1.42705e-20
68020	APOPT1	520.523	0.726271	0.076076	9.54665	1.3396e-21	1.466e-20
16443	ITSN1	2244.18	0.885108	0.0927365	9.54434	1.36983e-21	1.49794e-20
69550	BST2	1375.17	-3.18711	0.333939	-9.54398	1.37457e-21	1.50198e-20
57295	ICMT	2766.8	0.621467	0.0651202	9.54339	1.38236e-21	1.50934e-20
19302	PEX2	1159.7	-0.523842	0.0550403	-9.51744	1.77498e-21	1.93655e-20
98682	MFSD6	2846.93	-2.7923	0.293521	-9.51311	1.85047e-21	2.01738e-20
21803	TGFB1	1663.02	0.905552	0.0951954	9.51256	1.86019e-21	2.02643e-20
68616	GDPD3	62.0314	-3.79891	0.399471	-9.50986	1.90916e-21	2.0782e-20
67039	RBM25	5111.17	0.617656	0.0649645	9.50759	1.95131e-21	2.12248e-20
20911	STXBP2	1701.78	-1.14213	0.120135	-9.50698	1.9628e-21	2.13336e-20
83813	TNK1	198.363	-9.62054	1.01197	-9.50677	1.9667e-21	2.13598e-20
327655	PPIP5K1	701.936	-0.75022	0.078931	-9.50475	2.00527e-21	2.17622e-20
66196	MYO19	1286.81	0.790841	0.0832116	9.50397	2.02028e-21	2.19086e-20
239833	LMLN	231.134	-1.49611	0.157467	-9.5011	2.07688e-21	2.25053e-20
17117	AMACR	307.314	1.71261	0.180259	9.50082	2.08242e-21	2.25483e-20
20425	SHMT1	1369.83	0.480698	0.0506107	9.49794	2.14088e-21	2.31638e-20
242100	PGLYRP3	82.901	-9.80393	1.03233	-9.49687	2.16296e-21	2.33851e-20
70892	TTLL7	1623.3	-1.0321	0.108738	-9.49163	2.27444e-21	2.45718e-20
14963	H2-Bl	211.768	-1.71276	0.180525	-9.48767	2.36263e-21	2.55054e-20
19283	PTPRZ1	94.8283	-9.99827	1.05385	-9.48734	2.36996e-21	2.55653e-20
224912	CRB3	148.917	-10.6491	1.1237	-9.47687	2.62016e-21	2.8243e-20
56531	YLPM1	3275.89	0.457354	0.0482804	9.47287	2.72246e-21	2.93237e-20
16542	KDR	316.686	-8.11273	0.856463	-9.47236	2.73588e-21	2.94462e-20
212999	TNPO2	6057.98	-0.626898	0.0662129	-9.46791	2.85492e-21	3.07043e-20
68477	RMND5A	1805.91	0.582203	0.0615196	9.4637	2.97227e-21	3.19424e-20
16590	KIT	114.243	-10.265	1.08521	-9.45901	3.10876e-21	3.33843e-20
12614	CELSR1	251.398	-6.62612	0.70095	-9.45305	3.29114e-21	3.53164e-20
20847	STAT2	523.143	-1.17277	0.124067	-9.45279	3.2992e-21	3.53764e-20
68097	DYNLL2	4737.09	-0.876979	0.0927912	-9.4511	3.35298e-21	3.59262e-20
14782	GSR	4542.85	0.920507	0.0974762	9.4434	3.60861e-21	3.86363e-20
22678	ZFP2	81.2776	-9.77426	1.03605	-9.43413	3.94249e-21	4.21796e-20
72050	KDELC1	1184.69	0.896607	0.0950512	9.43288	3.98967e-21	4.26526e-20
23794	ADAMTS5	245.849	3.631	0.384977	9.43174	4.03324e-21	4.30863e-20
230726	RHBDL2	97.1725	-8.00438	0.849093	-9.42698	4.22073e-21	4.50557e-20
14366	FZD4	110.37	2.45551	0.260511	9.42573	4.27104e-21	4.55588e-20
218121	MBOAT1	879.284	-2.42947	0.257791	-9.42418	4.3347e-21	4.62035e-20
53618	FUT8	1428.12	1.13265	0.120246	9.41946	4.53396e-21	4.82916e-20
75826	SENP2	2328.82	-0.416633	0.0442606	-9.41318	4.8137e-21	5.12331e-20
27418	MKLN1	1588.9	-0.526123	0.0558953	-9.41265	4.83795e-21	5.1453e-20
100503499	Gm16136	86.9809	-9.87097	1.0491	-9.40899	5.00913e-21	5.3234e-20
76527	IL34	1048.22	-1.35911	0.144469	-9.40763	5.07429e-21	5.38866e-20
13345	TWIST2	1278.98	4.85379	0.516013	9.40631	5.13837e-21	5.45268e-20
14873	GSTO1	11134.9	2.08864	0.222096	9.4042	5.24295e-21	5.55954e-20
67728	DPH2	662.388	1.01528	0.107991	9.40151	5.37859e-21	5.69916e-20
15529	SDC2	5885.4	0.958118	0.10193	9.39978	5.4676e-21	5.7892e-20
106957	SLC39A6	5777.67	0.997494	0.106126	9.39914	5.50129e-21	5.82058e-20
53611	VTI1A	911.163	-0.931766	0.0991455	-9.39797	5.56283e-21	5.88135e-20
26879	B3GALNT1	208.97	9.74915	1.0375	9.39679	5.62537e-21	5.94309e-20
20259	SCIN	143.18	-1.5309	0.162936	-9.39574	5.68181e-21	5.9983e-20
20661	SORT1	431.264	-4.55921	0.485418	-9.39235	5.86737e-21	6.18964e-20
21789	TFPI2	139.122	9.87845	1.05184	9.39159	5.91037e-21	6.23043e-20
60533	CD274	75.0994	-4.06705	0.433445	-9.38308	6.40719e-21	6.74919e-20
212712	SATB2	1226.39	1.96348	0.209316	9.38045	6.56918e-21	6.91475e-20
194744	SLC25A43	134.044	-1.41699	0.151088	-9.37859	6.68627e-21	7.03283e-20
72077	GCNT3	207.614	-8.66374	0.92412	-9.37512	6.90964e-21	7.26247e-20
231327	PPAT	2432.2	0.681911	0.0727458	9.37388	6.99113e-21	7.34274e-20
67286	IFT22	326.931	-1.2102	0.129125	-9.37236	7.09282e-21	7.44409e-20
68817	DDI2	738.094	1.10078	0.117557	9.3638	7.69186e-21	8.0669e-20
269400	RTEL1	1980.57	0.468254	0.0500218	9.36098	7.89998e-21	8.27911e-20
11980	ATP8A1	144.249	-10.6019	1.13306	-9.35692	8.20941e-21	8.59711e-20
72278	CCPG1	530.603	-0.914291	0.0977647	-9.35195	8.60426e-21	9.00403e-20
236266	ALMS1	1050.67	0.79819	0.0854194	9.34437	9.24412e-21	9.66657e-20
16658	MAFB	105.49	-10.15	1.08656	-9.34139	9.50765e-21	9.93491e-20
18109	MYCN	45.2562	5.32931	0.570517	9.34121	9.52422e-21	9.94497e-20
19725	RFX2	109.463	-1.83509	0.196616	-9.33336	1.02569e-20	1.07022e-19
19159	CYTH3	1629.13	1.44668	0.155057	9.33	1.05866e-20	1.10383e-19
19358	RAD23A	1948.71	-0.480347	0.0514918	-9.32861	1.0727e-20	1.11765e-19
218215	RNF144B	149.637	-6.2158	0.666344	-9.32821	1.07678e-20	1.12108e-19
16330	INPP5B	877.469	0.840656	0.0901487	9.32522	1.10753e-20	1.15227e-19
20775	SQLE	10393	0.733066	0.0786167	9.32455	1.11452e-20	1.1587e-19
209497	TMEM164	1612.81	0.727784	0.0781255	9.31557	1.213e-20	1.26017e-19
103573	XPO1	10916	0.437024	0.0469216	9.31391	1.23217e-20	1.27915e-19
14236	FOXN2	1572.71	0.925433	0.099373	9.31272	1.24597e-20	1.29255e-19
99326	GARNL3	156.664	-2.97487	0.319545	-9.30972	1.28173e-20	1.32868e-19
16331	INPP5D	49.0014	-2.67581	0.28746	-9.30848	1.29674e-20	1.34327e-19
70762	DCLK2	164.431	2.16007	0.232069	9.30788	1.30406e-20	1.34988e-19
73062	PPP1R16A	747.142	-0.623079	0.0669455	-9.30725	1.31183e-20	1.35694e-19
71207	NUDT4	6029.18	-1.03119	0.110806	-9.30629	1.32378e-20	1.36832e-19
58801	PMAIP1	297.751	-5.94548	0.639145	-9.30224	1.37513e-20	1.42037e-19
23918	IMPDH2	435.581	0.975648	0.10489	9.30163	1.38314e-20	1.42761e-19
27375	TJP3	101.131	-10.0913	1.08525	-9.29857	1.42348e-20	1.4682e-19
68196	HSBP1	1805.91	-0.534593	0.0574991	-9.29742	1.43901e-20	1.48315e-19
18176	NRAS	5118.61	-0.448596	0.048265	-9.29443	1.47995e-20	1.52425e-19
18738	pitpna	6741.96	-0.545868	0.0587316	-9.29429	1.48198e-20	1.52525e-19
74413	TC2N	296.415	-10.205	1.09801	-9.29413	1.4841e-20	1.52633e-19
54004	DIAPH2	1153.35	-0.894282	0.0962408	-9.29214	1.51223e-20	1.55416e-19
76967	2700049A03Rik	896.423	0.779019	0.0838375	9.29201	1.51398e-20	1.55483e-19
76044	NCAPG2	4869.49	0.600943	0.0646773	9.29139	1.52281e-20	1.56279e-19
215819	NHSL1	3943.26	-1.98978	0.214158	-9.29119	1.52573e-20	1.56467e-19
15476	HS3ST1	99.317	-10.0632	1.0836	-9.28688	1.58883e-20	1.62821e-19
70155	OGFRL1	569.512	0.862901	0.0929491	9.28358	1.63879e-20	1.67821e-19
14049	EYA2	72.0281	-9.60148	1.03443	-9.28191	1.6646e-20	1.70342e-19
67894	FAM45A	834.786	-0.673896	0.0726271	-9.27885	1.71319e-20	1.7519e-19
111241	Hmga1-rs1	6400.78	1.3491	0.145444	9.27577	1.76333e-20	1.80188e-19
237769	Gm12258	78.4618	-1.97328	0.212868	-9.27	1.86137e-20	1.90072e-19
211064	ALKBH1	509.389	0.755951	0.081555	9.26922	1.87515e-20	1.91342e-19
67916	PLPP3	1884.24	3.13703	0.338443	9.26899	1.87917e-20	1.91617e-19
114128	LAPTM4B	2444.03	0.617589	0.066665	9.26407	1.96778e-20	2.00509e-19
24088	TLR2	1147	-1.73101	0.186968	-9.25832	2.07666e-20	2.11454e-19
19229	PTK2B	581.18	-5.76935	0.623441	-9.25404	2.16174e-20	2.1996e-19
16392	ISL1	74.3294	9.69544	1.0479	9.2523	2.19703e-20	2.23393e-19
78943	ERN1	536.089	-1.23215	0.133234	-9.24801	2.28719e-20	2.32396e-19
70355	GPRC5C	252.632	-9.40182	1.01683	-9.24623	2.32552e-20	2.36123e-19
107986	ddb2	182.638	-3.19494	0.345656	-9.24313	2.39379e-20	2.42883e-19
73720	CST6	619.803	-4.30871	0.466416	-9.23791	2.51354e-20	2.54854e-19
13848	EPHB6	819.966	-2.14375	0.232134	-9.23495	2.58402e-20	2.61814e-19
231003	KLHL17	307.619	0.883507	0.0956802	9.23395	2.60828e-20	2.64086e-19
75939	4930579G24Rik	838.82	0.731694	0.079245	9.23332	2.62362e-20	2.65452e-19
53860	41890	6974.84	-0.613271	0.0664594	-9.22775	2.76365e-20	2.79423e-19
71709	SYDE1	1644.38	0.965636	0.104661	9.22635	2.8001e-20	2.82909e-19
233979	TPCN2	393.353	0.770372	0.0835149	9.22437	2.85239e-20	2.87989e-19
230770	TMEM39B	307.486	1.5611	0.169295	9.22119	2.93817e-20	2.96441e-19
320772	MDGA2	80.2485	-9.75809	1.05838	-9.21984	2.97543e-20	2.9999e-19
58235	NECTIN1	3327.44	-2.24559	0.243567	-9.21959	2.98239e-20	3.0048e-19
11993	AUP1	3406.08	0.460408	0.0499662	9.2144	3.13014e-20	3.15144e-19
20893	BHLHE40	3207.5	-1.36469	0.148107	-9.21421	3.13581e-20	3.15494e-19
67465	SF3A1	4688.53	0.404239	0.043904	9.20735	3.34285e-20	3.36088e-19
67306	ZC2HC1A	1138.14	-1.14174	0.124071	-9.20229	3.50394e-20	3.52038e-19
14696	GNB4	463.154	2.83805	0.308419	9.20192	3.51603e-20	3.53005e-19
75415	ARHGAP12	1409.74	-1.01562	0.110445	-9.1957	3.72545e-20	3.73769e-19
93706	PCDHGC3	6361.91	1.59219	0.173152	9.19532	3.73864e-20	3.7483e-19
545551	BC021767	55.8567	-6.44914	0.701552	-9.19267	3.83202e-20	3.83925e-19
76055	MGEA5	4628.57	-0.649249	0.0706482	-9.18988	3.93273e-20	3.9374e-19
16774	LAMA3	331.782	-4.73487	0.515269	-9.18911	3.96096e-20	3.96289e-19
79202	Tnfrsf22	899.63	-0.630874	0.0686584	-9.18859	3.98027e-20	3.97944e-19
381290	ATP2B4	354.341	-4.36208	0.474793	-9.18733	4.02721e-20	4.02356e-19
93734	MPV17L	120.52	-2.20791	0.240386	-9.18484	4.12152e-20	4.11492e-19
70294	rnf126	2653.79	0.436309	0.0475045	9.18457	4.1316e-20	4.12193e-19
75717	CUL5	3024.18	0.69145	0.0752844	9.1845	4.13428e-20	4.12193e-19
18476	PAFAH1B3	444.639	-1.04052	0.113296	-9.18408	4.15068e-20	4.13541e-19
107723	SLC12A6	1311.1	-0.656896	0.0715603	-9.1796	4.32679e-20	4.30787e-19
14154	FEM1A	2037.46	0.738066	0.0804655	9.17246	4.62366e-20	4.60026e-19
17756	MAP2	1321.52	-4.46465	0.486825	-9.17095	4.68879e-20	4.66182e-19
80750	N4BP1	2326.6	-0.90758	0.0989741	-9.16987	4.73571e-20	4.70521e-19
11475	ACTA2	503.482	4.93452	0.538231	9.16804	4.81713e-20	4.78279e-19
20909	Stx4a	1341.58	0.637063	0.0695294	9.1625	5.07103e-20	5.0314e-19
30806	ADAMTS8	82.0098	-7.34187	0.801698	-9.1579	5.29169e-20	5.24671e-19
98758	HNRNPF	1877.33	0.584999	0.0640209	9.13762	6.38394e-20	6.3253e-19
73723	SH3BGRL3	1343.29	0.948232	0.103812	9.13412	6.59418e-20	6.5291e-19
217166	NR1D1	762.727	1.49199	0.163372	9.13244	6.69711e-20	6.62645e-19
18771	PKNOX1	714.334	0.777522	0.0851417	9.13209	6.71875e-20	6.64327e-19
14629	GCLC	4846.37	1.16159	0.127329	9.12273	7.32578e-20	7.2385e-19
11928	ATP1A1	29955.1	-0.557253	0.0610956	-9.12099	7.44383e-20	7.35007e-19
78920	DLST	6530.78	0.694297	0.0761388	9.11883	7.59391e-20	7.49311e-19
214763	MB21D1	650.988	0.860709	0.094442	9.11363	7.96742e-20	7.85626e-19
75216	CEP128	1437.3	0.634757	0.0696549	9.11288	8.02251e-20	7.90515e-19
70691	3830403N18Rik	99.7949	10.1215	1.11221	9.10031	9.00721e-20	8.86935e-19
225659	CEP76	1159.59	0.773886	0.0850847	9.09549	9.41634e-20	9.26586e-19
72401	SLC43A1	70.9538	6.56997	0.722604	9.09208	9.71645e-20	9.55462e-19
320528	VPS13C	2635.43	1.16058	0.127656	9.09149	9.76928e-20	9.59999e-19
66686	DCBLD1	517.657	-0.780953	0.0859043	-9.09096	9.81671e-20	9.63999e-19
433182	eno1b	1251.23	0.898114	0.0988019	9.09005	9.89977e-20	9.71491e-19
13405	DMD	242.144	-11.3495	1.25042	-9.07659	1.12031e-19	1.09864e-18
17873	GADD45B	1180.65	-1.42422	0.156957	-9.07397	1.14762e-19	1.12465e-18
319880	TMCC3	2254.69	-1.13515	0.125171	-9.06876	1.20379e-19	1.17889e-18
68659	FAM198B	1470.91	3.58678	0.395556	9.06771	1.21547e-19	1.18952e-18
17702	MSX2	63.1131	-9.4085	1.03762	-9.06741	1.21875e-19	1.19191e-18
30944	Zfp354c	156.213	1.56751	0.172975	9.06204	1.28033e-19	1.25129e-18
18755	PRKCH	61.1129	-3.55811	0.392705	-9.06051	1.2984e-19	1.26808e-18
69101	YDJC	166.551	2.88278	0.318595	9.04842	1.45046e-19	1.41563e-18
76441	DAAM2	110.756	-6.3062	0.697083	-9.04655	1.47553e-19	1.43912e-18
73469	RNF38	1288.61	-0.94977	0.104998	-9.04557	1.48889e-19	1.45116e-18
74185	GBE1	3180.04	0.927947	0.102597	9.04461	1.50206e-19	1.463e-18
67374	JAM2	1850.89	2.01165	0.222448	9.04326	1.5207e-19	1.48015e-18
20479	VPS4B	2435.79	-0.478197	0.0528874	-9.0418	1.54108e-19	1.49898e-18
110877	SLC18A1	61.116	-4.62742	0.512238	-9.03373	1.65913e-19	1.6127e-18
23805	APC2	173.624	-3.98394	0.441171	-9.03038	1.71069e-19	1.6617e-18
228839	TGIF2	80.0684	3.13216	0.347046	9.02518	1.79395e-19	1.74139e-18
56454	ALDH18A1	3076.99	0.780701	0.0865248	9.02286	1.83237e-19	1.77749e-18
208994	FAM83B	62.9645	-9.40509	1.04312	-9.01629	1.94574e-19	1.88618e-18
66166	S100A14	109.663	-9.48296	1.05239	-9.01085	2.0447e-19	1.98011e-18
14567	GDI1	1509.78	-0.781719	0.0867535	-9.01081	2.04539e-19	1.98011e-18
67484	EEPD1	97.1366	-4.52574	0.502349	-9.00917	2.0762e-19	2.00858e-18
12530	CDC25A	1367.89	0.738823	0.0820293	9.00683	2.12106e-19	2.05059e-18
20877	AURKB	2449.25	0.458268	0.0509092	9.00166	2.22325e-19	2.14794e-18
12408	CBR1	353.674	-1.27225	0.141384	-8.99858	2.28654e-19	2.2076e-18
12054	BCL7B	757.919	0.66853	0.0742949	8.99834	2.29164e-19	2.21104e-18
83925	TRPS1	4615.65	0.917639	0.101993	8.99711	2.31734e-19	2.23433e-18
23961	Oas1b	51.0043	-3.13911	0.349382	-8.98475	2.59327e-19	2.4987e-18
217684	SUSD6	4407.92	-0.4269	0.0475776	-8.97271	2.89309e-19	2.78572e-18
13033	CTSD	30798.5	-1.67581	0.186841	-8.96917	2.98768e-19	2.87486e-18
208111	Zfp976	84.7268	-4.17465	0.465458	-8.96892	2.99437e-19	2.87937e-18
68169	NDNF	71.4189	-9.58697	1.06932	-8.96547	3.08971e-19	2.96906e-18
66713	ACTR2	11406.3	-0.479134	0.0534702	-8.96077	3.22425e-19	3.09627e-18
108013	CELF4	121.685	-3.52253	0.39339	-8.9543	3.41911e-19	3.27919e-18
380714	RPH3AL	46.879	-5.71351	0.638076	-8.95429	3.4193e-19	3.27919e-18
243084	TMPRSS11E	177.791	-8.87273	0.991455	-8.9492	3.58066e-19	3.43165e-18
14229	FKBP5	3963.54	-1.83745	0.205387	-8.94629	3.67633e-19	3.52099e-18
15361	HMGA1	1039.58	1.64368	0.18378	8.94375	3.762e-19	3.60063e-18
68789	trmt61b	227.398	-1.27497	0.142557	-8.94358	3.76751e-19	3.60349e-18
68262	AGPAT4	375.442	1.42496	0.159345	8.94263	3.80008e-19	3.63223e-18
66403	ASF1A	837.668	0.755128	0.0844938	8.93708	3.99603e-19	3.81698e-18
319262	FCHSD1	603.301	-2.22797	0.249395	-8.93351	4.12704e-19	3.9395e-18
109108	SLC30A9	2282.51	-0.389323	0.0435972	-8.92998	4.26071e-19	4.06439e-18
234729	VAC14	1718.77	-0.74468	0.0834228	-8.92658	4.39374e-19	4.18851e-18
93888	Pcdhb17	146.139	2.08696	0.233839	8.92477	4.46642e-19	4.25496e-18
223918	spryd3	1224.02	-1.16988	0.131164	-8.91918	4.69758e-19	4.47221e-18
235044	PLPPR2	201.441	2.38266	0.267172	8.91808	4.74459e-19	4.51397e-18
71198	OTUD1	602.793	1.35194	0.151602	8.91764	4.76321e-19	4.52868e-18
27047	OMD	78.036	7.01665	0.786845	8.91746	4.77119e-19	4.53327e-18
329650	MED12L	135.834	1.55205	0.174113	8.91402	4.92133e-19	4.67064e-18
330671	b4galnt4	81.539	3.79522	0.425759	8.914	4.92229e-19	4.67064e-18
75572	ACYP2	264.556	1.43943	0.161501	8.91283	4.9745e-19	4.71706e-18
29819	STAU2	460.221	-1.981	0.222306	-8.91114	5.05122e-19	4.78665e-18
19155	NPEPPS	3967.37	-0.573103	0.0643279	-8.90909	5.14529e-19	4.87258e-18
12825	COL3A1	1085.01	12.8427	1.44166	8.90832	5.18126e-19	4.9034e-18
12861	Cox6a1	2836.59	-0.66719	0.074953	-8.90143	5.513e-19	5.21391e-18
66218	NDUFB9	2286.28	0.480587	0.0540046	8.89901	5.63476e-19	5.32556e-18
68799	RGMB	803.544	1.96321	0.220786	8.89191	6.00658e-19	5.67323e-18
17391	MMP24	248.732	-9.35611	1.05223	-8.89171	6.01773e-19	5.68002e-18
74718	SNX16	380.839	-1.08527	0.122091	-8.88898	6.16725e-19	5.81732e-18
230848	ZBTB40	734.41	0.865791	0.097411	8.88802	6.22076e-19	5.86395e-18
13639	EFNA4	180.591	-1.174	0.132115	-8.88618	6.3247e-19	5.95801e-18
320213	SENP5	3652.53	-0.508914	0.0573398	-8.87541	6.96789e-19	6.5596e-18
208266	DOT1L	2765.39	0.530723	0.0598176	8.87237	7.16075e-19	6.73674e-18
74147	ehhadh	80.3562	-6.49249	0.731986	-8.86969	7.33504e-19	6.89619e-18
22441	Xlr	130.168	8.04463	0.907066	8.86884	7.39105e-19	6.94429e-18
242125	MAB21L3	41.1494	-3.93447	0.443776	-8.8659	7.58881e-19	7.12543e-18
12795	PLK3	1189.31	-0.96067	0.108367	-8.86493	7.65506e-19	7.18294e-18
328329	MAST4	4538.13	0.89919	0.101436	8.86461	7.67738e-19	7.19918e-18
271813	AGBL2	85.6645	-6.21308	0.701544	-8.8563	8.27177e-19	7.7501e-18
434341	NLRC5	88.0754	-2.30964	0.260793	-8.85624	8.27571e-19	7.7501e-18
19362	RAD51AP1	783.149	0.78808	0.0890002	8.85481	8.38253e-19	7.84502e-18
228421	KIF18A	955.281	0.67671	0.0764391	8.85293	8.52501e-19	7.97317e-18
64685	NMI	177.628	-1.34913	0.152504	-8.84652	9.02875e-19	8.43879e-18
77531	ANKS1B	42.1586	3.82729	0.432781	8.84348	9.2783e-19	8.66639e-18
384309	TRIM56	1015.63	-0.650082	0.0735136	-8.84302	9.31697e-19	8.69685e-18
71722	CIC	5763.3	0.909721	0.102982	8.83378	1.01195e-18	9.4398e-18
13627	EEF1A1	45810.3	0.22279	0.0252256	8.83188	1.02929e-18	9.5945e-18
623781	Gm14137	369.683	1.2967	0.146821	8.83182	1.02987e-18	9.5945e-18
17125	SMAD1	1126.14	0.602286	0.068222	8.82833	1.06255e-18	9.89253e-18
21413	TCF4	2517.58	1.45611	0.164957	8.82724	1.07292e-18	9.9826e-18
622434	ARHGEF26	127.689	-2.47822	0.280981	-8.81987	1.14589e-18	1.06546e-17
12521	CD82	1332.47	-2.26504	0.256948	-8.81517	1.19499e-18	1.1104e-17
329727	DENND2C	429.488	-1.65898	0.188293	-8.81064	1.24433e-18	1.1555e-17
319586	CELF5	133.672	-4.92488	0.559025	-8.80977	1.25406e-18	1.16378e-17
241556	TSPAN18	121.73	-8.91754	1.01242	-8.80815	1.27224e-18	1.17988e-17
69090	ASCC1	446.326	-0.921624	0.104657	-8.80612	1.29553e-18	1.20071e-17
16201	ILF3	4172.13	0.645585	0.0733459	8.80193	1.34479e-18	1.24555e-17
65960	TWSG1	3963.95	-0.517321	0.0587836	-8.80042	1.363e-18	1.26161e-17
100503318	Gm15853	68.1913	2.2727	0.258416	8.79472	1.43409e-18	1.32655e-17
27660	1700088E04Rik	54.5573	-2.12346	0.241666	-8.78672	1.53983e-18	1.42345e-17
22004	TPM2	1501.56	4.22023	0.480386	8.78507	1.56272e-18	1.44368e-17
19889	RP2	1060.6	-0.628879	0.071595	-8.78385	1.57979e-18	1.45851e-17
13527	DTNA	383.513	-2.46829	0.281009	-8.78365	1.5826e-18	1.46016e-17
320939	5930403L14Rik	54.0396	9.23704	1.05202	8.78032	1.63012e-18	1.50304e-17
240283	DMXL1	6343.82	-2.58775	0.294774	-8.77876	1.65281e-18	1.52299e-17
237988	CDR2L	1269.93	2.55959	0.291596	8.77787	1.66598e-18	1.53414e-17
16880	LIFR	298.63	4.03209	0.459458	8.77576	1.69754e-18	1.56219e-17
74032	SDR42E1	134.925	-1.82766	0.208278	-8.77505	1.7082e-18	1.571e-17
231093	AGBL5	177.944	-1.13154	0.129003	-8.77144	1.76389e-18	1.62117e-17
71853	PDIA6	10648.4	0.857716	0.0978192	8.76838	1.81252e-18	1.6648e-17
12419	CBX5	9148.82	-0.503097	0.0573827	-8.7674	1.82836e-18	1.67828e-17
107587	osr2	50.0854	9.12732	1.04111	8.76689	1.83661e-18	1.68478e-17
69675	PXDN	4472.2	1.04639	0.119428	8.76169	1.92352e-18	1.76337e-17
223227	SOX21	41.7184	-5.76158	0.657712	-8.76004	1.95188e-18	1.78822e-17
65962	slc9a3r2	265	-1.14811	0.131081	-8.75872	1.97478e-18	1.80805e-17
217578	BAZ1A	3320.23	0.684046	0.0781122	8.75722	2.00124e-18	1.83111e-17
223753	CERK	608.424	0.611304	0.0698168	8.75584	2.02595e-18	1.85254e-17
244871	ZC3H12C	992.033	-0.867068	0.0990538	-8.7535	2.06834e-18	1.89009e-17
94089	TRIM7	110.955	-2.26815	0.259356	-8.74534	2.22351e-18	2.03059e-17
72027	SLC39A4	182.794	-4.11998	0.471306	-8.74164	2.29759e-18	2.09691e-17
21826	THBS2	1953.66	7.33778	0.839504	8.74061	2.3185e-18	2.11466e-17
28135	CEP63	542.315	0.730987	0.0836874	8.73473	2.44238e-18	2.22623e-17
233552	GDPD5	638.294	-3.55035	0.406963	-8.72401	2.6852e-18	2.44601e-17
11800	API5	4391.69	0.369391	0.0423557	8.72117	2.75347e-18	2.5066e-17
77590	CHST15	122.069	6.94346	0.79619	8.72086	2.76102e-18	2.51188e-17
338320	mia2	105.548	-1.92138	0.220446	-8.71589	2.88494e-18	2.62296e-17
27206	NRK	57.3611	-9.26987	1.06384	-8.71357	2.94451e-18	2.67542e-17
15013	H2-Q2	519.983	-1.6724	0.191955	-8.71247	2.97323e-18	2.69981e-17
230696	AU022252	294.904	1.10825	0.127246	8.70952	3.05174e-18	2.76934e-17
217558	G2E3	2430.27	0.711926	0.0817536	8.70819	3.08762e-18	2.80013e-17
66175	mustn1	67.0378	5.0734	0.583245	8.69859	3.36046e-18	3.04564e-17
194126	MTMR11	694.127	2.05498	0.2363	8.69651	3.42245e-18	3.09986e-17
14555	GPD1	38.6163	-3.61636	0.416074	-8.69163	3.57266e-18	3.23388e-17
16172	IL17RA	1752.67	1.00632	0.115849	8.68655	3.73614e-18	3.37972e-17
76499	CLASP2	2050.27	0.689989	0.079441	8.68556	3.76897e-18	3.40727e-17
73836	SLC35B2	1539.65	0.555498	0.0640497	8.67292	4.21166e-18	3.80508e-17
14252	FLOT2	2000.48	-0.9046	0.104319	-8.67144	4.26694e-18	3.8526e-17
16890	LIPE	154.887	-1.75761	0.202713	-8.67043	4.30507e-18	3.88458e-17
12468	CCT7	13518.9	0.742881	0.0857561	8.66272	4.60635e-18	4.15382e-17
78388	MVP	1836	-1.35931	0.157005	-8.6578	4.80971e-18	4.33448e-17
244864	LAYN	2023.33	4.1083	0.474829	8.65217	5.05315e-18	4.55101e-17
666532	Zfp991	41.6194	-5.78592	0.668738	-8.65199	5.06099e-18	4.55521e-17
72121	DENND2D	56.3651	-9.24477	1.06913	-8.64699	5.28751e-18	4.75611e-17
50876	TMOD2	177.851	3.66275	0.423728	8.64412	5.42203e-18	4.87405e-17
574428	ZMYND15	54.1021	-5.3813	0.622592	-8.64339	5.45674e-18	4.90218e-17
11576	AFP	172.121	3.07838	0.356192	8.64248	5.50066e-18	4.93854e-17
67102	D16Ertd472e	688.997	1.16069	0.134389	8.63681	5.78066e-18	5.18669e-17
319839	A530020G20Rik	118.299	-8.87365	1.02763	-8.63509	5.8682e-18	5.26194e-17
56318	ACPP	317.016	-4.77864	0.553604	-8.63188	6.03518e-18	5.40829e-17
58185	RSAD2	69.0695	-2.82615	0.327427	-8.6314	6.06075e-18	5.42781e-17
216618	CFAP36	942.395	-0.660598	0.0765617	-8.62831	6.22644e-18	5.57272e-17
60315	myg1	791.593	-0.992776	0.115111	-8.62452	6.43618e-18	5.7537e-17
67216	MBOAT2	131.046	-2.56724	0.297668	-8.62451	6.43667e-18	5.7537e-17
20130	RRAS	677.132	-1.14617	0.1329	-8.62436	6.44512e-18	5.75767e-17
15234	HGF	47.9379	6.60281	0.765735	8.62284	6.53125e-18	5.83098e-17
216363	RAB3IP	1504.26	-0.554463	0.0643345	-8.61844	6.78728e-18	6.05579e-17
22724	ZBTB7B	1944.85	-0.994009	0.115364	-8.61625	6.91855e-18	6.16908e-17
235610	ATRIP	564.986	0.648551	0.0752968	8.61327	7.10065e-18	6.32752e-17
242960	FBXL5	1850.38	-0.387836	0.0450326	-8.61234	7.15851e-18	6.37512e-17
71900	TMEM106B	7126.66	-0.861218	0.100029	-8.6097	7.32499e-18	6.51666e-17
71874	2310007B03Rik	161.816	-5.36307	0.622911	-8.60968	7.32653e-18	6.51666e-17
268783	MTMR12	1592.41	0.783383	0.090999	8.6087	7.38969e-18	6.56876e-17
26874	ABCD2	33.5742	3.1667	0.367872	8.60818	7.42306e-18	6.59435e-17
12038	BCHE	194.977	-11.0369	1.28402	-8.59563	8.28105e-18	7.352e-17
16161	IL12RB1	74.7097	3.81521	0.443875	8.59525	8.30823e-18	7.37157e-17
234889	GUCY1A2	60.7733	-5.54609	0.645282	-8.59484	8.33792e-18	7.39334e-17
100502841	EPG5	1428.4	-0.878548	0.102266	-8.59083	8.63461e-18	7.65168e-17
56375	B4GALT4	267.828	-2.34501	0.272986	-8.59025	8.67791e-18	7.68531e-17
243725	PPP1R9A	51.1208	-4.91961	0.572965	-8.58622	8.98777e-18	7.95482e-17
433904	OCIAD2	382.028	-2.10296	0.244973	-8.58444	9.12796e-18	8.07391e-17
11731	Ang2	274.063	3.32483	0.387341	8.58375	9.18301e-18	8.1176e-17
52024	ANKRD22	46.9592	-8.98137	1.048	-8.57002	1.03464e-17	9.14034e-17
67263	ZSWIM6	710.904	1.42609	0.166629	8.55844	1.14402e-17	1.01004e-16
76454	FBXO31	888.032	1.34072	0.156657	8.55835	1.14493e-17	1.01023e-16
109019	NABP1	2256.51	-1.32829	0.155279	-8.55425	1.18636e-17	1.04614e-16
67788	SFR1	4070.07	0.57307	0.0670018	8.55305	1.19875e-17	1.05641e-16
98258	TXNDC9	1857.38	-0.437507	0.051181	-8.54822	1.25005e-17	1.10095e-16
66859	SLC16A9	129.134	5.28478	0.618262	8.54781	1.25445e-17	1.10385e-16
54561	NAP1L3	74.3636	-8.92165	1.04374	-8.54777	1.25488e-17	1.10385e-16
20184	UIMC1	797.497	0.937414	0.109695	8.54565	1.2781e-17	1.12358e-16
216011	LRRC20	383.976	-1.25146	0.146481	-8.54346	1.30265e-17	1.14447e-16
170571	CNTNAP4	83.5818	9.14202	1.0704	8.54075	1.3335e-17	1.17085e-16
67398	SRPR	2307.78	0.670054	0.0784725	8.53871	1.35732e-17	1.19104e-16
12070	BEX3	2792.52	-0.477228	0.0558981	-8.53747	1.37197e-17	1.20316e-16
66665	MSANTD3	752.538	0.736069	0.0862177	8.53732	1.37366e-17	1.20391e-16
83383	TFAP4	576.89	0.914195	0.107138	8.53284	1.42801e-17	1.25078e-16
380614	intu	211.966	-0.993561	0.11647	-8.5306	1.45589e-17	1.27441e-16
18426	OVOL1	33.4913	-4.832	0.566672	-8.52698	1.50217e-17	1.31412e-16
66616	SNX9	3463.95	1.23259	0.144578	8.52543	1.52238e-17	1.33099e-16
239319	CARD6	717.755	1.03202	0.121079	8.52354	1.54753e-17	1.35216e-16
16431	ITM2A	123.892	-8.93748	1.04909	-8.51931	1.60513e-17	1.40163e-16
621837	Gm6265	614.438	0.709909	0.0833635	8.51582	1.65416e-17	1.44357e-16
224093	FAM43A	188.975	1.75943	0.206687	8.51255	1.70151e-17	1.48399e-16
19654	RBM6	1379	0.420405	0.0493886	8.51218	1.70688e-17	1.48777e-16
68404	NRN1	254.837	5.09256	0.598577	8.50778	1.77288e-17	1.54402e-16
67469	ABHD5	2541.33	1.3206	0.155224	8.50774	1.77358e-17	1.54402e-16
77853	MSL2	1592.86	0.525697	0.0618185	8.50388	1.83356e-17	1.59528e-16
237175	ADGRG2	1518.6	-2.52197	0.296922	-8.4937	2.00167e-17	1.74048e-16
192120	BSPRY	89.2883	-7.88468	0.928361	-8.49312	2.01161e-17	1.7471e-16
245007	ZBTB38	2219.86	-1.1208	0.131965	-8.49311	2.01171e-17	1.7471e-16
66603	GEMIN2	452.804	0.671493	0.0790762	8.49172	2.036e-17	1.76712e-16
671878	Gm14680	364.615	1.17782	0.13878	8.48693	2.12163e-17	1.84033e-16
11790	SPEG	60.9016	-2.50469	0.295421	-8.47837	2.28379e-17	1.97979e-16
14667	GM2A	1285.41	-2.368	0.279302	-8.47828	2.28542e-17	1.98001e-16
330122	CXCL3	247.948	-9.94899	1.17351	-8.47799	2.29116e-17	1.98378e-16
15116	HAS1	128.779	9.76656	1.15263	8.47326	2.38625e-17	2.06487e-16
237459	CDK17	1501.18	-0.54765	0.0646353	-8.47292	2.39307e-17	2.06952e-16
19219	PTGER4	566.512	2.59415	0.30639	8.46682	2.52185e-17	2.17958e-16
223827	GXYLT1	2160.5	-0.67311	0.0795046	-8.46631	2.533e-17	2.1879e-16
18596	PDGFRB	2855.73	8.03696	0.949349	8.46576	2.54483e-17	2.19679e-16
56442	SERINC1	8577.9	-0.35439	0.0418635	-8.46537	2.5534e-17	2.20286e-16
20405	SH3GL1	1940.93	0.609721	0.0720321	8.46457	2.57107e-17	2.21678e-16
15220	FOXQ1	129.35	-2.6993	0.318944	-8.46323	2.60067e-17	2.24095e-16
18789	PAPOLA	9651.34	0.53075	0.0627256	8.46145	2.64082e-17	2.27418e-16
28169	AGPAT3	2586.37	-0.87446	0.103353	-8.46092	2.65281e-17	2.28313e-16
20818	SRPRB	2288.48	0.563114	0.0665593	8.46033	2.66619e-17	2.29327e-16
12492	SCARB2	2039.13	-1.22126	0.144433	-8.45556	2.7775e-17	2.38759e-16
20710	Serpinb9e	51.4114	-4.34635	0.514035	-8.45536	2.78234e-17	2.39031e-16
22041	trf	230.323	-8.02323	0.948997	-8.45444	2.80437e-17	2.4078e-16
18762	PRKCZ	42.9198	-8.85298	1.04719	-8.45407	2.81319e-17	2.41393e-16
67865	RGS10	147.381	2.27828	0.269512	8.45337	2.83024e-17	2.42711e-16
226841	VASH2	816.078	1.97902	0.234119	8.45302	2.83863e-17	2.43284e-16
22288	UTRN	3902.41	-1.00683	0.119141	-8.45079	2.89338e-17	2.47829e-16
20908	STX3	901.673	-1.06092	0.125564	-8.44927	2.9314e-17	2.50883e-16
240025	DACT2	264.694	-10.029	1.18697	-8.44922	2.93253e-17	2.50883e-16
18807	PLD3	1893.77	-1.05603	0.125024	-8.44659	2.99927e-17	2.5644e-16
100043314	Tigit	400.076	-5.25295	0.622013	-8.44508	3.03824e-17	2.59617e-16
68992	Zfp580	97.7847	2.74984	0.325617	8.445	3.04053e-17	2.59658e-16
97884	B3GALNT2	1650.08	-0.673038	0.079726	-8.44189	3.12242e-17	2.66492e-16
11836	ARAF	1677.55	-0.505986	0.0599391	-8.44167	3.12824e-17	2.6683e-16
22057	TOB1	1374.02	-1.67021	0.197924	-8.43861	3.21138e-17	2.73759e-16
22632	YY1	3599.13	0.593327	0.0703558	8.43324	3.36231e-17	2.86455e-16
270163	MYO9A	2464.28	0.827365	0.0981326	8.4311	3.42444e-17	2.91576e-16
11830	AQP5	517.419	-5.92214	0.702515	-8.42991	3.45944e-17	2.9438e-16
14528	GCH1	390.327	-2.63474	0.31273	-8.42497	3.60832e-17	3.06868e-16
77552	SHISA4	608.283	-2.03485	0.241625	-8.4215	3.71705e-17	3.15927e-16
15051	H2-T9	217.466	-1.48533	0.176421	-8.41923	3.78958e-17	3.21901e-16
71409	FMNL2	2984.41	-1.63026	0.193715	-8.41577	3.90317e-17	3.31354e-16
12010	B2M	14725.4	-1.40875	0.167544	-8.40826	4.16134e-17	3.53062e-16
14872	GstT2	53.7796	-3.99355	0.475046	-8.40667	4.21832e-17	3.57684e-16
77318	ankrd55	69.4842	2.62057	0.311965	8.40021	4.45687e-17	3.77689e-16
14709	GNG8	35.3242	5.84092	0.695603	8.39692	4.58339e-17	3.88181e-16
234967	SLC36A4	281.368	0.992315	0.118197	8.39541	4.6426e-17	3.92964e-16
114715	SPRED1	2948.91	1.10528	0.131768	8.38812	4.93985e-17	4.17878e-16
14588	GFRA4	32.0062	3.70075	0.441212	8.3877	4.95764e-17	4.19136e-16
330256	Gm20559	76.6922	-1.90312	0.226991	-8.38414	5.10987e-17	4.31751e-16
18779	PLA2R1	138.079	-4.53344	0.540818	-8.38255	5.17938e-17	4.37367e-16
74011	SLC25A27	55.7902	-3.77093	0.450008	-8.37971	5.30603e-17	4.47798e-16
213649	ARHGEF19	337.621	-1.8612	0.222178	-8.37708	5.42574e-17	4.57632e-16
69771	1810019D21Rik	33.193	-4.98215	0.594826	-8.37582	5.48411e-17	4.62283e-16
74256	CYLD	2464.67	-0.689993	0.0823971	-8.374	5.56962e-17	4.69215e-16
67759	PLGRKT	503.232	-0.884889	0.105682	-8.37311	5.61187e-17	4.72497e-16
17921	MYO7A	265.336	-6.3218	0.755177	-8.37128	5.6996e-17	4.79603e-16
140500	acap3	1765	1.19017	0.142199	8.36978	5.77279e-17	4.85476e-16
20481	SKI	4492.66	0.702788	0.0840603	8.36053	6.24374e-17	5.24774e-16
208285	Cyp4f17	186.964	-1.84035	0.22017	-8.35877	6.33753e-17	5.32345e-16
69894	2010107G23Rik	75.1844	-9.66343	1.15628	-8.35733	6.41511e-17	5.38546e-16
69875	NDUFA11	814.051	-0.53422	0.0639442	-8.35447	6.5726e-17	5.51445e-16
16973	LRP5	3183.36	-1.04623	0.125231	-8.35437	6.57829e-17	5.51599e-16
98878	EHD4	3124.1	-2.01713	0.241463	-8.35379	6.6109e-17	5.5401e-16
56213	HTRA1	6914.08	-1.87002	0.22398	-8.34906	6.88108e-17	5.76315e-16
319875	TMPRSS11B	46.1526	-2.50556	0.300107	-8.34889	6.89088e-17	5.768e-16
66925	SDHD	3006.86	0.571472	0.0684633	8.34714	6.99379e-17	5.85072e-16
17392	MMP3	1307.72	3.87925	0.464812	8.34585	7.07051e-17	5.91146e-16
60440	iigp1	69.6495	-4.91826	0.589374	-8.34488	7.12838e-17	5.95637e-16
67433	CCDC127	1995.52	0.439437	0.0526644	8.3441	7.17564e-17	5.99237e-16
259302	SRGAP3	1830	-1.00054	0.120167	-8.32626	8.34395e-17	6.96397e-16
74043	PEX26	566.2	-1.1037	0.132604	-8.32327	8.55679e-17	7.13746e-16
13682	EIF4A2	3634.91	-0.515619	0.0619592	-8.32192	8.65487e-17	7.21507e-16
16593	KLC1	4595.37	0.889741	0.106952	8.31907	8.86525e-17	7.38617e-16
24052	SGCD	67.1781	8.82728	1.06174	8.31398	9.25456e-17	7.70605e-16
230784	SESN2	831.615	-0.754031	0.0907283	-8.31086	9.50103e-17	7.90669e-16
74610	ABCB8	689.534	-0.772951	0.0930357	-8.30811	9.72374e-17	8.08734e-16
54448	Il1f6	58.5019	-7.2689	0.875974	-8.29807	1.05815e-16	8.79562e-16
17769	MTHFR	999.326	1.25837	0.15168	8.29619	1.07499e-16	8.93046e-16
380785	BEGAIN	33.1359	4.56579	0.550353	8.29612	1.07562e-16	8.93055e-16
71908	CLDN23	47.6996	-9.00844	1.0859	-8.29581	1.07851e-16	8.94934e-16
15374	HN1	3372.73	-0.633198	0.0763449	-8.2939	1.09592e-16	9.08853e-16
66569	GDPD1	790.472	-2.28476	0.275549	-8.29167	1.11669e-16	9.25547e-16
57905	ISY1	1564.04	1.18528	0.142951	8.29155	1.11782e-16	9.25947e-16
140494	ATP6V0A4	84.951	1.74237	0.210167	8.29043	1.12839e-16	9.34162e-16
231380	UBA6	2177.35	-0.41773	0.0504004	-8.28822	1.14956e-16	9.51142e-16
260315	NAV3	1936.23	0.90041	0.10865	8.28729	1.15854e-16	9.57661e-16
21844	TIAM1	830.102	-3.31265	0.399727	-8.28727	1.15878e-16	9.57661e-16
245827	FAT2	180.746	-7.88043	0.951794	-8.27955	1.23638e-16	1.0212e-15
56316	GGCX	829.986	0.687152	0.0830191	8.27704	1.26276e-16	1.0424e-15
319758	RFX7	2463.43	0.413541	0.049994	8.2718	1.31949e-16	1.0886e-15
105841	DENND3	311.214	-2.32856	0.281699	-8.26613	1.38378e-16	1.14098e-15
230157	TMEFF1	358.472	2.96428	0.358622	8.26576	1.38806e-16	1.14386e-15
67460	DECR1	634.386	-1.79888	0.21765	-8.26504	1.39649e-16	1.15014e-15
72543	MVB12B	1241.91	-1.37256	0.166186	-8.25917	1.4669e-16	1.20744e-15
56358	COPZ2	255.568	1.13658	0.137637	8.2578	1.48385e-16	1.22068e-15
66994	CEP19	346.407	-0.828101	0.10033	-8.25375	1.53499e-16	1.26204e-15
108888	ATAD3A	1442.44	0.720122	0.0872752	8.25117	1.56847e-16	1.28878e-15
105853	MAL2	160.016	-10.0292	1.2155	-8.25111	1.56931e-16	1.28878e-15
217615	#N/A	2766.34	0.512073	0.0621707	8.23658	1.77209e-16	1.45447e-15
18131	NOTCH3	93.1175	-3.79558	0.461501	-8.22442	1.96141e-16	1.60894e-15
52850	SGSM1	335.747	-1.91687	0.233391	-8.21311	2.15541e-16	1.76706e-15
19015	PPARD	2570.45	1.36862	0.166651	8.21249	2.16641e-16	1.77507e-15
226976	KANSL3	1946.7	-0.761182	0.0926922	-8.21194	2.17648e-16	1.78231e-15
67429	NUDCD1	2217.16	1.30544	0.159039	8.20835	2.24244e-16	1.83527e-15
12317	CALR	25783.7	0.463846	0.0565313	8.20511	2.30376e-16	1.88438e-15
320100	RELT	368.849	1.38293	0.168844	8.19059	2.59956e-16	2.12512e-15
67071	RPS6KA6	215.605	-11.1821	1.36552	-8.18892	2.63582e-16	2.15354e-15
20639	SNRPB2	1290.67	0.604024	0.073809	8.18361	2.75464e-16	2.24934e-15
17240	MDFI	84.8275	-4.66345	0.569953	-8.18216	2.788e-16	2.27528e-15
228432	ANO3	82.5854	-7.76867	0.949891	-8.17849	2.87421e-16	2.3443e-15
67873	mri1	551.827	0.813307	0.0994572	8.17745	2.89906e-16	2.36323e-15
74682	WDR35	1430.18	-0.752576	0.0920321	-8.17732	2.9023e-16	2.36453e-15
21888	TLE4	54.8806	-9.20698	1.12621	-8.17519	2.95405e-16	2.40532e-15
68839	ANKRD46	1732.91	0.568382	0.069535	8.17405	2.98209e-16	2.42678e-15
105859	CSDC2	43.3939	-5.41533	0.662669	-8.172	3.03327e-16	2.46703e-15
71648	OPTN	800.509	-1.61023	0.197151	-8.16749	3.14884e-16	2.55957e-15
241520	FAM171B	379.279	0.938047	0.114931	8.16183	3.29978e-16	2.68074e-15
109658	TXLNA	3929.39	1.12049	0.137299	8.1609	3.32539e-16	2.70002e-15
12785	CNBP	17327	0.883705	0.108409	8.15158	3.59209e-16	2.91491e-15
272636	ESYT3	186.45	-8.52247	1.04563	-8.15059	3.62139e-16	2.93703e-15
66443	TNFAIP8L1	70.6743	-2.07623	0.254752	-8.15	3.63938e-16	2.94996e-15
230657	TMEM69	443.759	0.895736	0.109927	8.14846	3.68586e-16	2.98594e-15
241075	PLEKHM3	660.744	-1.28942	0.158262	-8.14738	3.71905e-16	3.01113e-15
56209	GDE1	2022.14	-0.535078	0.0656917	-8.14528	3.78402e-16	3.06201e-15
68126	FAHD2A	34.7651	-8.54891	1.05009	-8.14115	3.91531e-16	3.16646e-15
117591	SLC2A9	27.4936	-3.40012	0.417674	-8.1406	3.9332e-16	3.17913e-15
231646	MYO1H	71.2949	2.20049	0.270338	8.13975	3.96092e-16	3.19974e-15
15114	HAP1	88.656	-1.63233	0.20056	-8.13884	3.99081e-16	3.22207e-15
54325	ELOVL1	2249.97	0.976848	0.120036	8.13796	4.01997e-16	3.24379e-15
19222	PTGIR	34.1311	8.57299	1.05361	8.13678	4.05941e-16	3.27377e-15
74766	YIPF2	294.928	-1.25066	0.153792	-8.13215	4.21758e-16	3.39941e-15
12395	RUNX1T1	54.5157	8.52304	1.04846	8.12912	4.32406e-16	3.48329e-15
22259	NR1H3	52.0206	-6.35981	0.782829	-8.12413	4.5057e-16	3.62757e-15
19042	PPM1A	3413.99	0.400615	0.0493299	8.12114	4.61826e-16	3.71611e-15
83398	NDST3	38.3131	-2.69052	0.33144	-8.11767	4.75225e-16	3.81965e-15
210530	P3H2	85.8053	1.79991	0.221727	8.11767	4.75226e-16	3.81965e-15
14048	EYA1	77.4851	5.56086	0.685069	8.11722	4.76972e-16	3.83153e-15
12925	CRIP1	958.369	1.68676	0.207803	8.11708	4.77538e-16	3.83394e-15
17192	MBD3	4263.17	0.445727	0.0549207	8.11582	4.82518e-16	3.87175e-15
140486	IGF2BP1	499.825	-3.76637	0.464184	-8.11397	4.89941e-16	3.92911e-15
12904	CRABP2	368.63	2.89912	0.357385	8.11203	4.97818e-16	3.99005e-15
68612	UBE2C	3581.5	0.396047	0.0488276	8.11112	5.01551e-16	4.01773e-15
12305	ddr1	2446.01	-1.03713	0.12788	-8.11022	5.05264e-16	4.04521e-15
52480	SNHG14	53.6151	-9.17327	1.1314	-8.10787	5.15146e-16	4.12203e-15
14469	GBP2	310.253	-1.195	0.147474	-8.10312	5.35681e-16	4.28395e-15
235534	PXYLP1	687.041	-1.34784	0.166373	-8.10132	5.43641e-16	4.34519e-15
97827	EXD2	730.735	0.69876	0.086257	8.10091	5.45512e-16	4.35772e-15
74596	cds1	51.2804	-6.31325	0.779427	-8.09986	5.50237e-16	4.39299e-15
20135	RRM2	10643.1	0.656504	0.0810519	8.09979	5.5054e-16	4.39299e-15
67043	SYAP1	1434.21	-0.520612	0.0643538	-8.08983	5.97472e-16	4.76483e-15
97863	FAM8A1	603.986	-0.750538	0.092795	-8.08813	6.0588e-16	4.8292e-15
217218	ATXN7L3	2595.25	0.337294	0.0417051	8.08758	6.08616e-16	4.84831e-15
71982	SNX10	917.482	-0.576597	0.0713035	-8.08651	6.13964e-16	4.8882e-15
74376	MYO18B	107.575	-3.30029	0.408157	-8.08582	6.17499e-16	4.91362e-15
22213	UBE2G2	1930.06	-0.559694	0.0692464	-8.08264	6.3381e-16	5.04062e-15
78038	MCCC2	321.266	-0.937367	0.116007	-8.08028	6.46163e-16	5.13601e-15
23989	MED24	1657.28	0.409771	0.0507147	8.07992	6.48087e-16	5.14845e-15
18616	PEG3	1639.12	-14.1088	1.74712	-8.07546	6.72221e-16	5.33722e-15
13113	Cyp3a13	55.2916	-8.49599	1.05227	-8.07394	6.80639e-16	5.40107e-15
77877	6030458C11Rik	1158.24	0.813639	0.100781	8.07337	6.83839e-16	5.42346e-15
12151	BMI1	2671.62	0.566212	0.0701856	8.06735	7.18418e-16	5.69456e-15
77574	TCAF1	992.708	-0.661973	0.0820611	-8.06682	7.21511e-16	5.71591e-15
20019	POLR1A	6564.55	0.971081	0.120397	8.06565	7.28502e-16	5.76811e-15
73095	SLC25A42	133.194	-1.59828	0.198182	-8.06473	7.3395e-16	5.80804e-15
242915	GAREM2	126.953	2.65263	0.32892	8.06466	7.344e-16	5.8084e-15
74143	OPA1	3167.42	-0.537679	0.0666852	-8.06294	7.4479e-16	5.88733e-15
18933	PRRX1	8837.02	4.30883	0.534604	8.05986	7.63824e-16	6.03446e-15
107586	OVOL2	36.1432	-6.14653	0.76281	-8.05775	7.7713e-16	6.1362e-15
18392	ORC1	975.845	1.22673	0.152518	8.04315	8.75581e-16	6.90977e-15
22156	TUFT1	301.586	-2.68709	0.334456	-8.03421	9.41825e-16	7.42846e-15
70021	NT5DC2	1201.18	3.99873	0.498043	8.02888	9.83693e-16	7.75442e-15
237082	NXT2	718.338	-0.558156	0.0695297	-8.0276	9.93985e-16	7.83125e-15
17132	MAF	267.6	3.07915	0.383715	8.02457	1.01879e-15	8.0223e-15
53416	STK39	2700.76	-1.74328	0.217248	-8.0244	1.02021e-15	8.02909e-15
69047	ATP2C2	34.528	-5.74864	0.716437	-8.02394	1.02407e-15	8.05501e-15
215789	PHACTR2	80.2767	-6.50288	0.810906	-8.01928	1.06365e-15	8.36172e-15
105522	ANKRD28	5792.83	1.51336	0.188838	8.01407	1.1097e-15	8.71901e-15
94062	MRPL3	1355.95	0.485331	0.060562	8.01379	1.11222e-15	8.73403e-15
67951	TUBB6	11053.5	-0.263067	0.0328277	-8.01357	1.11422e-15	8.74493e-15
234725	Zfp612	42.5741	-8.84009	1.1036	-8.01024	1.14483e-15	8.98028e-15
101631	PWWP2B	1032.6	-1.02372	0.127809	-8.00973	1.14956e-15	9.01244e-15
13123	CYP7B1	36.7807	-8.62935	1.07754	-8.00839	1.16216e-15	9.1062e-15
11595	ACAN	96.4327	-9.2994	1.16126	-8.00803	1.16559e-15	9.12812e-15
105734	TIGD5	152.29	1.15106	0.14376	8.00683	1.17705e-15	9.21283e-15
16562	KIF1C	13949	-0.823971	0.102944	-8.0041	1.20348e-15	9.41455e-15
72580	ZUFSP	228.791	-0.884044	0.110509	-7.99977	1.24647e-15	9.74555e-15
72649	TMEM209	2171.56	-0.568547	0.0711126	-7.99502	1.29548e-15	1.01232e-14
12589	IFT81	344.251	-0.934203	0.116859	-7.99431	1.30307e-15	1.0177e-14
19024	PPFIBP2	420.11	-5.57735	0.697693	-7.99398	1.30648e-15	1.01981e-14
94093	TRIM33	2065.5	-0.453388	0.0567179	-7.99375	1.30899e-15	1.02121e-14
212168	ZSWIM4	1157.49	-0.794525	0.0994944	-7.98562	1.39815e-15	1.09018e-14
67455	KLHL13	35.4993	-8.5776	1.07414	-7.98554	1.39914e-15	1.09036e-14
99890	PRMT6	807.445	0.598482	0.0749745	7.98247	1.43428e-15	1.11714e-14
50934	SLC7A8	167.949	7.58521	0.951512	7.97174	1.56453e-15	1.21792e-14
67887	SARAF	2230.89	-0.34737	0.0435778	-7.97127	1.57048e-15	1.22189e-14
19179	PSMC1	3540.78	0.585452	0.0734682	7.96878	1.60254e-15	1.24616e-14
228765	SDCBP2	107.6	-4.07275	0.511265	-7.96603	1.63849e-15	1.27343e-14
232035	CCSER1	48.7715	-8.31239	1.04385	-7.9632	1.67647e-15	1.30224e-14
76178	COA5	3242.71	-0.584636	0.0734555	-7.95905	1.7337e-15	1.34567e-14
100952	EMILIN1	198.042	4.75154	0.597002	7.95901	1.73426e-15	1.34567e-14
14874	GSTZ1	623.313	0.652732	0.0820275	7.95748	1.75585e-15	1.36169e-14
234959	MED17	1300.8	0.56972	0.071621	7.95465	1.79636e-15	1.39235e-14
232187	SMYD5	2085.27	0.962245	0.120986	7.95334	1.81551e-15	1.40643e-14
22320	VAMP8	1536.54	-1.01937	0.128207	-7.95094	1.85098e-15	1.43313e-14
230603	TTC39A	203.134	-3.23255	0.407054	-7.94133	2.00026e-15	1.54788e-14
13136	CD55	146.823	-6.25895	0.788196	-7.94086	2.0079e-15	1.55295e-14
71901	FAM219A	307.339	1.35865	0.171149	7.93841	2.04795e-15	1.58308e-14
11370	ACADVL	1384.58	-0.703113	0.088584	-7.93724	2.06723e-15	1.59712e-14
72114	ZBED3	854.978	1.04531	0.1317	7.93709	2.06985e-15	1.59752e-14
224807	TMEM63B	3363	-0.922511	0.116228	-7.93708	2.06998e-15	1.59752e-14
21841	TIA1	2022.49	0.501854	0.0632403	7.93567	2.09357e-15	1.61486e-14
192657	ELL2	2431.85	0.843898	0.10635	7.93512	2.10289e-15	1.62118e-14
19248	PTPN12	2690.66	-0.404931	0.0510408	-7.93348	2.13088e-15	1.64188e-14
14457	GAS7	866.193	1.33433	0.168197	7.93315	2.13662e-15	1.64542e-14
27883	TANGO2	248.317	-0.875509	0.110404	-7.93004	2.1907e-15	1.68616e-14
235559	TOPBP1	7790.64	0.488548	0.0616499	7.92456	2.28958e-15	1.76132e-14
14254	FLT1	886.536	-2.49625	0.315149	-7.92085	2.35898e-15	1.81374e-14
69225	NAXD	880.79	-0.47911	0.0604929	-7.9201	2.37317e-15	1.82367e-14
73998	herc3	1453.79	-0.695347	0.0878499	-7.91517	2.46923e-15	1.896e-14
19087	PRKAR2A	4239.66	1.03334	0.130553	7.91513	2.46994e-15	1.896e-14
654470	tctn1	211.69	-1.1291	0.142656	-7.91484	2.47573e-15	1.89943e-14
269514	FBXL4	429.189	-1.57234	0.198683	-7.91384	2.49572e-15	1.91374e-14
233571	P2RY6	27.9509	-4.73404	0.598238	-7.91331	2.50633e-15	1.92085e-14
67781	ILF2	3130.56	0.409898	0.051802	7.91279	2.51686e-15	1.92789e-14
211577	MRGPRF	92.9899	9.29628	1.17494	7.91211	2.53053e-15	1.93732e-14
67117	DYNLT3	2728.11	-1.50409	0.190267	-7.90514	2.67624e-15	2.04779e-14
66483	RPL36AL	530.226	0.557433	0.0705185	7.90478	2.68404e-15	2.05266e-14
408022	PRIMPOL	263.683	-0.999797	0.126513	-7.90271	2.72903e-15	2.08595e-14
73828	DCAF4	581.995	-0.770806	0.0975919	-7.89826	2.82822e-15	2.16062e-14
17777	MTTP	177.315	-2.37941	0.301401	-7.89448	2.91527e-15	2.22594e-14
56403	SYNCRIP	9286.28	0.790027	0.100098	7.89252	2.96149e-15	2.26003e-14
68537	MRPL13	1820.16	0.737775	0.0934789	7.89242	2.96381e-15	2.26059e-14
209011	SIRT7	682.519	-0.90499	0.114667	-7.8923	2.96657e-15	2.2615e-14
224088	ATP13A3	9646.22	-0.449499	0.0569559	-7.89205	2.97252e-15	2.26483e-14
18749	PRKACB	5938.4	-1.70232	0.215715	-7.8915	2.98568e-15	2.27365e-14
319269	A130040M12Rik	1258.84	3.82065	0.48416	7.8913	2.99059e-15	2.27618e-14
66168	GRINA	3866.62	-1.46664	0.186015	-7.88454	3.15698e-15	2.40155e-14
75568	CAPSL	30.0243	-8.33837	1.0578	-7.88275	3.20261e-15	2.43497e-14
94220	CNNM4	1019.88	-0.79976	0.101459	-7.88258	3.20678e-15	2.43684e-14
226162	DPCD	363.264	-0.796417	0.101066	-7.88017	3.26947e-15	2.48317e-14
75273	pelp1	2313.33	0.39227	0.049781	7.87991	3.27622e-15	2.48698e-14
110639	PRPS2	1941.63	-0.700388	0.0889368	-7.87512	3.40418e-15	2.58274e-14
17169	MARK3	3636.55	0.58915	0.0748794	7.86799	3.60389e-15	2.73282e-14
14859	GSTA3	43.5085	-3.74759	0.476438	-7.86585	3.66603e-15	2.77848e-14
18551	PCSK4	108.506	1.57719	0.200607	7.86208	3.77805e-15	2.86187e-14
19070	MOB4	2265.37	-0.606969	0.0772037	-7.86192	3.78297e-15	2.86408e-14
73916	IFT57	542.808	-0.845964	0.10763	-7.8599	3.84436e-15	2.90902e-14
229900	gbp7	238.528	-2.46167	0.313366	-7.85557	3.97951e-15	3.0097e-14
80281	CTTNBP2NL	2674.03	-0.297642	0.0378928	-7.85484	4.0027e-15	3.02564e-14
207742	RNF43	57.7682	-8.55998	1.08989	-7.85402	4.02913e-15	3.04402e-14
58521	EID1	1947.08	0.790864	0.100707	7.85311	4.05852e-15	3.06461e-14
73288	VPS50	1490.1	-0.752517	0.0958315	-7.8525	4.07812e-15	3.07779e-14
69274	CTDSPL	967.895	-0.63517	0.0809517	-7.84629	4.2854e-15	3.23252e-14
69709	PTRHD1	433.48	0.719429	0.0916994	7.84552	4.31168e-15	3.25064e-14
108937	RNF169	1037.05	-0.7894	0.100652	-7.84283	4.40506e-15	3.3193e-14
106565	DLK2	360.136	-2.03576	0.259592	-7.84215	4.42903e-15	3.33561e-14
244144	USP35	107.287	-1.34274	0.171248	-7.8409	4.47343e-15	3.36728e-14
208748	PRRG3	142.672	-10.5863	1.35068	-7.83778	4.58574e-15	3.45001e-14
19878	ROCK2	13350.3	0.73932	0.094354	7.83559	4.66634e-15	3.50881e-14
320207	PIK3R5	560.986	-4.52242	0.577276	-7.83406	4.72346e-15	3.54989e-14
319636	fsd1l	127.073	-1.34951	0.172264	-7.83394	4.72806e-15	3.55149e-14
12416	CBX2	519.473	-1.43443	0.183157	-7.83167	4.81427e-15	3.61436e-14
321006	vprbp	1821.3	0.541744	0.0691788	7.83107	4.83729e-15	3.62974e-14
70549	TLN2	1329.64	2.13495	0.272662	7.83002	4.87809e-15	3.65844e-14
270066	SLC35E1	3280.4	0.307091	0.0392239	7.82918	4.91067e-15	3.68095e-14
107513	SSR1	10962.9	0.861048	0.11	7.82767	4.9699e-15	3.7234e-14
68038	CHID1	642.357	-0.929651	0.118852	-7.82193	5.20202e-15	3.89527e-14
140740	SEC63	4829.11	-0.398275	0.0509189	-7.82175	5.20946e-15	3.89881e-14
12293	CACNA2D1	727.427	2.58482	0.330623	7.81803	5.36572e-15	4.01366e-14
74202	FBLIM1	2534.87	-1.72047	0.220087	-7.81723	5.39991e-15	4.03713e-14
232157	mob1a	3601.2	0.668814	0.0855694	7.81604	5.45106e-15	4.07325e-14
269855	SSC5D	103.321	3.83962	0.491425	7.81323	5.57391e-15	4.16288e-14
233315	MTMR10	2568.2	-0.357727	0.0457937	-7.81172	5.64141e-15	4.2111e-14
233875	INO80E	1218.74	1.10612	0.141602	7.81149	5.65152e-15	4.21645e-14
69882	VWA9	817.479	0.498584	0.0638435	7.80946	5.74332e-15	4.28271e-14
19819	RNASEH1	579.917	0.853308	0.109306	7.80663	5.87358e-15	4.37757e-14
30938	FGD3	660.099	-3.03983	0.389406	-7.80634	5.88745e-15	4.38563e-14
21953	TNNI2	88.5617	-7.87179	1.0084	-7.80623	5.89235e-15	4.38701e-14
73379	DCBLD2	5779.66	-1.06275	0.136144	-7.80606	5.90044e-15	4.39075e-14
80385	TUSC2	309.213	-0.7082	0.0907458	-7.80422	5.98704e-15	4.45288e-14
227753	GSN	9140.22	-0.835022	0.107035	-7.80141	6.12179e-15	4.55074e-14
17999	NEDD4	35071	0.370142	0.0474469	7.80119	6.13255e-15	4.55638e-14
16834	COG1	1301.28	0.483411	0.0620151	7.79505	6.43818e-15	4.78098e-14
78177	NINL	704.004	0.725984	0.0931841	7.79086	6.65533e-15	4.93968e-14
68736	TYW5	338.335	-0.669834	0.0859828	-7.79032	6.6838e-15	4.95825e-14
240087	MDC1	2898.43	0.510962	0.0655987	7.78921	6.74317e-15	4.99971e-14
65100	ZIC5	30.2787	8.40008	1.07862	7.78781	6.81813e-15	5.05267e-14
213550	DIS3L	955.572	0.6527	0.0838661	7.78264	7.10249e-15	5.26068e-14
212390	klhl32	40.0566	-8.75603	1.12563	-7.77877	7.32318e-15	5.42135e-14
56473	FADS2	3387.73	0.567642	0.0729843	7.77758	7.39232e-15	5.46971e-14
94185	TNFRSF21	613.754	-3.18309	0.409294	-7.77703	7.42449e-15	5.49068e-14
225997	TRPM6	77.8375	-4.40304	0.566473	-7.77273	7.68097e-15	5.67743e-14
67157	2610301B20Rik	519.594	-1.18404	0.152344	-7.77211	7.71898e-15	5.70258e-14
59027	NAMPT	4357.64	0.896464	0.115351	7.7716	7.74998e-15	5.72254e-14
30060	mfi2	102.111	-9.38157	1.20723	-7.77119	7.77552e-15	5.73844e-14
72183	SNX6	2710.81	0.446073	0.0574094	7.77004	7.84625e-15	5.78767e-14
66488	FAM136A	798.347	0.858246	0.110535	7.76445	8.19985e-15	6.04539e-14
27878	TADA1	984.716	1.13002	0.145578	7.76229	8.34087e-15	6.1462e-14
271564	VPS13A	3186.22	-0.777148	0.10015	-7.75985	8.5027e-15	6.26223e-14
217344	RHBDF2	924.986	-4.35674	0.561485	-7.75932	8.53876e-15	6.28556e-14
320184	LRRC58	8586.67	0.367408	0.047355	7.75859	8.58776e-15	6.31839e-14
100503043	ARMCX4	1934.44	1.35707	0.174952	7.75681	8.70889e-15	6.40423e-14
225363	ETF1	13716.6	0.227985	0.0293957	7.75573	8.78399e-15	6.45614e-14
22137	TTK	1510.34	0.543645	0.0701002	7.75525	8.81667e-15	6.47685e-14
11826	AQP1	286.595	3.0154	0.389055	7.75059	9.14673e-15	6.71587e-14
27078	B9D1	280.201	-1.01351	0.130778	-7.74985	9.19995e-15	6.75149e-14
17386	MMP13	1443.75	4.1084	0.530158	7.74938	9.23448e-15	6.77337e-14
72205	EML2	633.043	-2.47869	0.319889	-7.74861	9.29056e-15	6.81102e-14
244550	PODNL1	59.5335	4.86515	0.627942	7.74778	9.35159e-15	6.85226e-14
72141	ADPGK	1704.24	1.10018	0.142082	7.74331	9.68591e-15	7.09361e-14
18491	PAPPA	148.14	-7.17662	0.926977	-7.74196	9.78943e-15	7.16577e-14
64899	LPIN3	170.567	-2.01938	0.260902	-7.73998	9.9432e-15	7.27461e-14
12662	CHM	1188.23	-0.578333	0.0747377	-7.73818	1.00852e-14	7.37474e-14
353190	EDC3	930.524	0.532133	0.0687805	7.73668	1.02047e-14	7.45832e-14
60321	WBP11	3933.42	0.727723	0.0941228	7.73163	1.06178e-14	7.75628e-14
20512	SLC1A3	36.0638	4.01995	0.519988	7.73086	1.06819e-14	7.79913e-14
20603	SMS	407.965	0.742292	0.0960459	7.72851	1.0881e-14	7.94051e-14
109077	INTS5	2091.19	0.509064	0.0658742	7.72781	1.09412e-14	7.98031e-14
319974	AUTS2	56.3213	-9.24463	1.19635	-7.72734	1.09821e-14	8.00608e-14
67724	POP1	2521.8	1.52656	0.197566	7.72683	1.10254e-14	8.03357e-14
71345	ANO9	38.736	-8.70767	1.12786	-7.72054	1.15837e-14	8.43608e-14
27015	POLK	1085.8	-0.70666	0.0915466	-7.71913	1.17123e-14	8.52547e-14
67488	CALCOCO1	500.956	-1.58396	0.205328	-7.71432	1.21632e-14	8.84915e-14
100042069	Gm15210	1997.24	0.879085	0.113961	7.71393	1.21999e-14	8.87139e-14
70103	ZNHIT1	741.738	-0.528997	0.0685783	-7.71377	1.22154e-14	8.8781e-14
101994	CHAMP1	2065.72	0.470142	0.0609741	7.71052	1.2531e-14	9.10291e-14
382090	CEP162	442.547	-0.698087	0.0905561	-7.70889	1.26913e-14	9.2147e-14
52858	CDIPT	2960.42	-0.589718	0.0765041	-7.70832	1.27489e-14	9.25182e-14
72747	TTC39C	438.965	0.745803	0.0967692	7.70703	1.28779e-14	9.3407e-14
57339	JPH1	77.4882	-9.70522	1.25947	-7.70577	1.30054e-14	9.42843e-14
69743	CASZ1	83.5519	-3.3154	0.430291	-7.70501	1.30834e-14	9.48016e-14
16563	KIF2A	3022.85	1.20675	0.156644	7.70381	1.32066e-14	9.56459e-14
64658	MRPS25	1111.47	0.631064	0.0819239	7.70306	1.32848e-14	9.61638e-14
76650	SRXN1	12510.9	1.93914	0.251898	7.69808	1.38124e-14	9.99325e-14
230587	GLIS1	77.1902	2.67057	0.34697	7.69684	1.39472e-14	1.00857e-13
99681	TCHH	53.8329	-5.71745	0.742961	-7.6955	1.40946e-14	1.01828e-13
73167	ARHGAP8	84.671	-7.05682	0.917008	-7.69549	1.40957e-14	1.01828e-13
98496	PID1	241.119	-3.24589	0.421859	-7.69425	1.42324e-14	1.02764e-13
75590	DUSP9	1370.87	2.11634	0.275469	7.68269	1.55786e-14	1.12428e-13
21973	TOP2A	19940.2	0.456896	0.0594716	7.68259	1.55903e-14	1.12456e-13
269016	SH3RF2	31.2167	-8.39616	1.09313	-7.68082	1.58077e-14	1.13967e-13
22040	TREX1	186.528	1.30508	0.169939	7.67967	1.59493e-14	1.1493e-13
15006	H2-Q1	163.1	-1.28372	0.167311	-7.67266	1.68463e-14	1.21332e-13
67857	PPP6C	1292.45	0.497564	0.0648555	7.67188	1.69487e-14	1.22009e-13
66736	EMC2	1222.92	1.22562	0.159807	7.66938	1.72832e-14	1.24354e-13
67993	NUDT12	251.765	-1.54222	0.201136	-7.66756	1.75295e-14	1.26063e-13
22629	YWHAH	3609.28	-0.339898	0.0443546	-7.6632	1.81354e-14	1.30355e-13
67629	SPC24	648.019	0.845129	0.110288	7.66294	1.81726e-14	1.30557e-13
14373	G0S2	85.2549	-9.12144	1.19055	-7.66153	1.83738e-14	1.31936e-13
[truncated: 5,231 more rows]
