# Supplementary material for: CCL5 promotes breast cancer recurrence through macrophage recruitment in residual tumors
Source: eLife journal article supplement (doi:10.7554/elife.43653), 2019-04-15
Supplement: supp [file elife-43653-supp-v1.zip › elife_poa_e43653_Figure_6_source_data_2.xlsx]

## Sheet: Sheet2
Figure 6 - source data 2
Entrez	Symbol	baseMean	log2FoldChange	lfcSE	stat	pvalue	padj
80797	Clca3a2	2368.78	9.16618	0.753261	12.1687	4.56481e-34	2.29884e-30
209195	CLIC6	747.27	8.65506	0.838	10.3282	5.25191e-25	1.98365e-21
100038347	FAM174B	262.759	5.93801	0.605628	9.80472	1.07446e-22	2.70549e-19
12990	CSN1S1	944.389	8.53567	0.912217	9.35707	8.19815e-21	1.60571e-17
58860	ADAMDEC1	182.557	4.71281	0.557543	8.45282	2.84355e-17	3.06859e-14
15213	HEY1	261.35	5.23168	0.643088	8.13524	4.11116e-16	3.45063e-13
232345	A2M	178.832	9.44404	1.23714	7.63379	2.27952e-14	1.22996e-11
229933	CLCA2	89.5713	5.93479	0.784847	7.56172	3.97779e-14	1.9386e-11
16005	IGFALS	37.0294	5.11994	0.691778	7.40113	1.35026e-13	6.37493e-11
320007	SIDT1	189.492	4.4424	0.600952	7.39227	1.44342e-13	6.60822e-11
26366	Ceacam10	109.308	8.06758	1.09878	7.34233	2.09907e-13	9.06078e-11
70574	CPM	490.17	5.33236	0.730891	7.2957	2.97113e-13	1.24689e-10
20496	SLC12A2	1706.57	2.59907	0.360145	7.21671	5.32602e-13	2.11751e-10
12319	car8	97.0366	8.94684	1.24697	7.17487	7.23747e-13	2.69588e-10
12671	CHRM3	195.583	6.84562	0.96631	7.08429	1.39763e-12	4.91054e-10
99571	FGG	111.655	5.3776	0.769106	6.99201	2.7098e-12	8.72994e-10
12353	Car6	130.842	6.25502	0.91024	6.87184	6.33797e-12	1.91508e-09
16529	KCNK5	428.314	4.1424	0.60906	6.80131	1.03675e-11	3.01216e-09
57816	TESC	100.68	9.78768	1.4406	6.79418	1.08928e-11	3.10506e-09
233099	#N/A	57.2285	9.4896	1.4046	6.75607	1.41787e-11	3.89477e-09
23945	MGLL	329.004	2.05287	0.305107	6.72836	1.71587e-11	4.62916e-09
17304	MFGE8	3632.7	3.50717	0.5384	6.51406	7.31447e-11	1.6251e-08
58187	CLDN10	57.6235	4.91421	0.765586	6.41888	1.37278e-10	2.96286e-08
78896	1500015O10Rik	192.264	5.1443	0.802447	6.41077	1.4479e-10	3.08097e-08
100294583	#N/A	80.1043	8.10937	1.2734	6.3683	1.91132e-10	3.90219e-08
216643	GABRP	445.799	6.13759	0.9662	6.3523	2.12121e-10	4.21674e-08
50500	TTPA	66.898	6.00492	0.966707	6.21173	5.24039e-10	9.53878e-08
17436	ME1	298.197	3.36366	0.543242	6.19182	5.9474e-10	1.06968e-07
20203	S100B	97.3908	4.49442	0.740675	6.06801	1.29501e-09	2.19832e-07
232413	CLEC12A	585.854	-2.44038	0.406524	-6.00305	1.93639e-09	3.11224e-07
723792	#N/A	21.3812	8.39597	1.41026	5.95347	2.62512e-09	3.96604e-07
22359	VLDLR	289.375	4.07892	0.690063	5.91094	3.40165e-09	5.08832e-07
224116	MUC20	19.7963	7.73317	1.32997	5.81457	6.07908e-09	8.74693e-07
108079	PRKAA2	84.441	4.08455	0.705292	5.79129	6.98474e-09	9.86219e-07
56175	BACE2	49.0338	4.4916	0.779778	5.7601	8.40659e-09	1.1652e-06
72432	SPINK5	28.0142	7.69645	1.33978	5.74454	9.21688e-09	1.2659e-06
12831	COL5A1	994.825	-1.83132	0.320366	-5.71635	1.08838e-08	1.44239e-06
12993	#N/A	739.485	8.25386	1.44803	5.70004	1.19776e-08	1.55998e-06
26381	ESRRG	63.6471	7.86057	1.38167	5.6892	1.27636e-08	1.64814e-06
328287	Gm20554	118.52	3.5537	0.627112	5.66677	1.45514e-08	1.86307e-06
330409	CECR2	51.199	5.21914	0.921976	5.66082	1.50649e-08	1.91261e-06
12991	CSN2	672.626	8.68617	1.53676	5.65228	1.58331e-08	1.99339e-06
12992	#N/A	14.2588	8.14941	1.45537	5.59954	2.14923e-08	2.59765e-06
320782	TMEM154	142.388	2.89531	0.518993	5.5787	2.42327e-08	2.90562e-06
93882	PCDHB11	18.7562	4.05315	0.732847	5.53069	3.18971e-08	3.73567e-06
76683	#N/A	57.7844	6.74589	1.22818	5.4926	3.96063e-08	4.56772e-06
269799	Clec4a1	526.157	-1.92285	0.353421	-5.44069	5.30741e-08	5.89591e-06
329735	4933431E20Rik	67.4076	2.51536	0.462588	5.43758	5.40103e-08	5.95611e-06
26422	NBEA	591.539	2.86034	0.529587	5.40108	6.62422e-08	7.09778e-06
16367	IRS1	683.923	2.33795	0.433258	5.3962	6.80656e-08	7.2418e-06
20277	SCNN1B	17.7015	7.8236	1.45121	5.39109	7.00314e-08	7.39884e-06
16770	LALBA	16.5058	6.30749	1.17228	5.38054	7.42619e-08	7.79131e-06
22239	Ugt8a	18.6722	6.39467	1.18918	5.3774	7.55697e-08	7.82124e-06
171284	#N/A	29.0196	6.64403	1.23555	5.37737	7.55826e-08	7.82124e-06
16564	KIF21A	286.334	3.56488	0.666455	5.34902	8.84295e-08	9.02698e-06
12722	Clca3a1	59.1651	4.84908	0.912435	5.31444	1.06988e-07	1.07045e-05
70377	DERL3	23.6811	3.46364	0.651904	5.31311	1.0777e-07	1.07118e-05
12023	barx2	94.4452	4.55854	0.858926	5.30726	1.11283e-07	1.08469e-05
209558	ENPP3	350.669	4.44698	0.84084	5.28873	1.23169e-07	1.1773e-05
66695	ASPN	402.682	-4.60662	0.874178	-5.26966	1.36679e-07	1.27466e-05
54140	AVPR1A	16.1787	3.3873	0.646173	5.24209	1.58765e-07	1.47155e-05
217305	CD300LD	1046.89	-1.25072	0.239303	-5.22649	1.72754e-07	1.57227e-05
108096	Slco1a5	114.783	3.9653	0.759737	5.21931	1.79593e-07	1.62472e-05
14066	F3	402.077	3.33672	0.639925	5.21424	1.84572e-07	1.65983e-05
107527	IL1RL2	192.31	1.82353	0.351898	5.18197	2.19558e-07	1.93982e-05
16371	IRX1	288.145	3.21912	0.623115	5.16618	2.3893e-07	2.09869e-05
12669	CHRM1	74.363	4.69789	0.919839	5.1073	3.26794e-07	2.82126e-05
216551	LGALSL	211.197	2.06308	0.404059	5.10589	3.29242e-07	2.82624e-05
68075	LURAP1	22.6607	3.6093	0.707962	5.09815	3.42985e-07	2.92758e-05
11537	CFD	80.706	6.81006	1.33724	5.09262	3.5314e-07	2.99733e-05
100503289	#N/A	19.996	7.57245	1.49018	5.08157	3.74334e-07	3.1344e-05
55990	FMO2	32.4564	3.62729	0.71868	5.04715	4.48457e-07	3.66231e-05
17341	BHLHA15	48.9213	5.0592	1.0038	5.04005	4.65401e-07	3.77947e-05
68588	CTHRC1	83.4504	-4.76096	0.957979	-4.96979	6.70252e-07	5.21967e-05
546144	WDR72	41.9132	4.42892	0.899206	4.92537	8.41997e-07	6.45731e-05
20296	CCL2	1995.86	-1.25831	0.260258	-4.83483	1.33259e-06	9.86902e-05
100740	AI839979	94.7219	-2.58989	0.536138	-4.83063	1.361e-06	0.000100302
229722	5330417C22Rik	95.0859	4.57972	0.948496	4.8284	1.37633e-06	0.00010094
93961	B3GALT5	338.045	3.3522	0.696015	4.81627	1.46263e-06	0.000105729
209743	AF529169	234.249	2.97641	0.618967	4.80868	1.51932e-06	0.000108672
22373	#N/A	9.82264	7.55312	1.5753	4.79471	1.62909e-06	0.000114476
13106	CYP2E1	17.6815	8.43088	1.76599	4.77403	1.80577e-06	0.000124573
14233	FOXI1	132.939	5.22492	1.0989	4.7547	1.98745e-06	0.000136483
12772	CCR2	2404.51	-1.88309	0.397114	-4.74194	2.11684e-06	0.000144711
13992	KHDRBS3	78.3625	2.79735	0.591623	4.72827	2.26443e-06	0.000151376
71520	GRAP	105.216	-1.46387	0.313125	-4.67505	2.93887e-06	0.000185776
67393	CXXC5	268.425	1.71531	0.370068	4.63512	3.56739e-06	0.000220886
14807	GRIK3	186.585	4.99807	1.07913	4.63157	3.62906e-06	0.000223787
107321	LPXN	776.036	-1.08733	0.234959	-4.62773	3.69695e-06	0.000227017
67719	#N/A	284.047	8.31998	1.79817	4.62692	3.71149e-06	0.000227017
71355	COL24A1	15.7653	-3.80168	0.822386	-4.62274	3.78697e-06	0.000229773
100047282	Gm20568	185.016	-0.874714	0.189427	-4.61769	3.88036e-06	0.000233564
77018	COL25A1	35.647	4.5866	0.994056	4.61403	3.94934e-06	0.000236773
215085	#N/A	23.5721	7.18223	1.56679	4.58404	4.56066e-06	0.00026915
98256	KMO	106.7	-1.58126	0.346424	-4.56454	5.006e-06	0.00029201
16494	KCNA6	22.5738	5.16087	1.14561	4.50492	6.63975e-06	0.000376857
78354	2210407C18Rik	10.3955	4.80611	1.0703	4.49042	7.10816e-06	0.00039922
217082	HLF	121.834	3.36355	0.752419	4.47031	7.81067e-06	0.000432248
20284	SCRG1	14.48	5.84801	1.308	4.47097	7.78673e-06	0.000432248
21677	TEAD2	115.18	2.0299	0.454816	4.46313	8.07724e-06	0.000445368
67017	FAM210B	253.315	1.29666	0.290884	4.45765	8.28618e-06	0.000453578
233274	Siglech	57.125	3.50391	0.786489	4.45513	8.3842e-06	0.000457287
360213	TRIM46	30.7363	3.3813	0.760257	4.44757	8.68469e-06	0.000465801
77569	LIMCH1	143.578	3.8497	0.867501	4.43769	9.09303e-06	0.00048435
330914	ARHGAP32	280.592	2.25205	0.509948	4.41624	1.00434e-05	0.000525311
50706	POSTN	3638.86	-2.92686	0.663935	-4.40835	1.0416e-05	0.00053892
68891	CD177	157.954	4.77965	1.08483	4.40588	1.05355e-05	0.000541398
26365	CEACAM1	543.357	2.40659	0.54774	4.39368	1.11445e-05	0.000566307
11554	ADRB1	82.1955	3.91973	0.892477	4.39197	1.12327e-05	0.00056757
58233	DNAJA4	342.936	2.25872	0.515516	4.38148	1.17875e-05	0.000593617
100043636	AI662270	698.761	-0.799647	0.183969	-4.34664	1.38241e-05	0.000678099
16858	LGALS7	21.3719	2.75721	0.638334	4.31939	1.56463e-05	0.000745691
22354	VIPR1	548.62	2.08658	0.485579	4.29709	1.73057e-05	0.000814499
80718	RAB27B	56.356	2.48295	0.578103	4.29499	1.747e-05	0.000817141
11979	#N/A	10.8068	5.82893	1.36081	4.28343	1.84037e-05	0.000847694
18595	PDGFRA	828.789	-3.79976	0.887579	-4.28104	1.86023e-05	0.000853947
70984	4931406C07Rik	577.646	1.49065	0.348247	4.28044	1.86525e-05	0.000853947
382253	CDKL5	90.6795	1.86911	0.439255	4.25517	2.08888e-05	0.000939252
217306	CD300E	76.6629	-2.12909	0.501295	-4.24718	2.1648e-05	0.000970499
12845	COMP	464.541	3.39356	0.80048	4.2394	2.24114e-05	0.000992937
237387	lrrc3	367.78	4.25592	1.00497	4.23489	2.28666e-05	0.0010072
22433	XBP1	3370.07	1.04702	0.24813	4.21966	2.44666e-05	0.00107143
12350	Car3	78.8085	5.56235	1.32123	4.20996	2.55412e-05	0.00111203
381680	Nxpe5	640.711	-1.42402	0.338784	-4.20333	2.63014e-05	0.00113532
13081	cyp24a1	71.1262	6.72387	1.6026	4.1956	2.72153e-05	0.0011678
64214	RGS18	109.795	-2.08559	0.498714	-4.18194	2.89029e-05	0.00122315
78754	GALNT15	66.1341	3.28134	0.785015	4.17998	2.91538e-05	0.0012269
319259	BRICD5	25.0337	4.74008	1.13391	4.18028	2.91148e-05	0.0012269
18542	PCOLCE	162.192	-2.28376	0.548919	-4.16048	3.17584e-05	0.00132859
74053	#N/A	21.7948	5.76712	1.38952	4.15044	3.3183e-05	0.00136975
77669	#N/A	32.1917	4.26852	1.03119	4.13942	3.48182e-05	0.00142944
71884	CHIT1	28.2953	5.96297	1.44557	4.12501	3.70725e-05	0.00150968
242594	1700024P16Rik	13.1935	3.6277	0.879661	4.12397	3.7239e-05	0.00151238
71069	STOX2	254.456	2.12514	0.517058	4.11007	3.95539e-05	0.0015809
66255	Hsbp1l1	12.0132	5.51233	1.34372	4.1023	4.09057e-05	0.00163062
74511	LRRC17	50.3179	-3.78541	0.923246	-4.10011	4.1295e-05	0.0016418
14245	LPIN1	659.352	1.78986	0.436618	4.09938	4.14265e-05	0.00164271
66198	THEM5	5.45884	6.61199	1.62181	4.07691	4.56381e-05	0.00178627
12578	CDKN2A	28.4854	3.61965	0.889646	4.06864	4.72884e-05	0.00184132
77781	EPM2AIP1	740.334	0.851232	0.20931	4.06684	4.76539e-05	0.00185079
72169	TRIM29	27.4198	3.22519	0.793629	4.06385	4.82693e-05	0.00186317
99439	DUOX1	154.038	4.64055	1.15222	4.0275	5.6374e-05	0.00210296
76491	ABHD14B	52.5119	2.02627	0.50348	4.02453	5.70885e-05	0.00212437
230903	FBXO44	70.9563	1.20286	0.300129	4.0078	6.12878e-05	0.00225838
67856	ECHDC3	86.0862	2.96221	0.740622	3.99962	6.34442e-05	0.00232086
100041546	Ly6c2	57.5171	-2.6448	0.662222	-3.99383	6.50145e-05	0.00236684
14804	#N/A	5.58288	5.8415	1.46544	3.98618	6.71459e-05	0.00243856
76905	LRG1	140.923	2.24196	0.562744	3.98399	6.7769e-05	0.00245529
210146	IRGQ	637.802	1.40228	0.352683	3.97604	7.00724e-05	0.0025206
68867	RNF122	236.262	1.56554	0.394309	3.97035	7.17681e-05	0.00256936
20352	SEMA4B	516.902	1.82461	0.460726	3.9603	7.48558e-05	0.00264853
100038573	#N/A	143.211	4.24014	1.07648	3.93887	8.18652e-05	0.00286965
13869	#N/A	24.8332	4.88484	1.24361	3.92795	8.56717e-05	0.00297547
16160	IL12B	274.548	3.31784	0.845559	3.92384	8.71482e-05	0.0030198
217379	UBXN2A	365.592	0.882268	0.225113	3.91922	8.88367e-05	0.00306426
100503073	#N/A	30.2455	3.2375	0.829646	3.90226	9.52978e-05	0.00327218
330723	HTRA4	219.398	1.58539	0.408749	3.87865	0.000105038	0.0035581
330119	ADAMTS3	67.9515	4.32031	1.11709	3.86746	0.000109974	0.00370043
277154	NYNRIN	135.561	-1.44886	0.375546	-3.858	0.000114318	0.00383803
99633	ADGRL2	580.771	1.22278	0.318195	3.84287	0.000121605	0.00405564
215798	ADGRG6	424.162	1.84895	0.483844	3.82138	0.000132705	0.00436799
320910	ITGB8	266.204	2.42892	0.636923	3.81352	0.000137003	0.0044899
11450	ADIPOQ	14.7208	5.80654	1.52559	3.8061	0.000141173	0.00461655
381485	TRIM55	35.1569	3.28329	0.865084	3.79534	0.000147441	0.00479041
18968	POLA1	845.702	-0.601943	0.158765	-3.79141	0.000149794	0.00485641
18636	CFP	2182.94	-1.98051	0.522841	-3.78798	0.000151877	0.00491028
72029	CNPY3	1137.12	-0.622161	0.164389	-3.78468	0.000153906	0.00492628
100862305	#N/A	16.6238	-2.91452	0.771238	-3.77902	0.000157448	0.00502902
73652	2210408F21Rik	39.5453	1.82087	0.482431	3.77437	0.000160414	0.00510218
67412	#N/A	11.1533	3.3265	0.881848	3.77219	0.000161824	0.00512545
66957	SERPINB11	10.7455	6.56359	1.74308	3.7655	0.000166213	0.00520986
13449	dok2	231.802	-1.62386	0.431689	-3.76164	0.000168803	0.00526917
450219	#N/A	4.69105	6.05782	1.61254	3.7567	0.000172168	0.00535208
56177	OLFM1	319.829	-1.26714	0.33743	-3.75526	0.000173164	0.005361
319973	A630077J23Rik	12.4786	4.56344	1.21567	3.75386	0.00017413	0.0053689
13800	ENAH	170.557	1.97416	0.527213	3.74452	0.00018074	0.00550529
245404	DCAF12L1	13.63	4.96774	1.32791	3.74102	0.000183277	0.00553789
12738	CLDN2	19.5514	4.5237	1.21472	3.72406	0.000196043	0.0058883
12509	Cd59a	84.1857	1.44423	0.387915	3.72305	0.000196833	0.00588861
20965	SYN2	6.71108	5.50803	1.47936	3.72326	0.00019667	0.00588861
13858	EPS15	2529.89	-0.962075	0.258809	-3.71732	0.000201349	0.00598816
93689	LMOD1	56.8144	3.27324	0.881907	3.71154	0.000205999	0.00609047
241452	DHRS9	84.148	-2.03035	0.547179	-3.71058	0.000206788	0.00610187
239652	#N/A	15.9603	4.14275	1.11685	3.70931	0.000207824	0.00612049
76157	#N/A	10.7693	5.41051	1.45971	3.70656	0.00021009	0.00616492
14734	GPC3	42.6526	2.46494	0.665372	3.70461	0.000211719	0.00618695
20312	CX3CL1	207.766	1.76006	0.475401	3.70227	0.000213677	0.00623212
27027	TSPAN32	187.844	-1.19765	0.323999	-3.69646	0.000218629	0.00635844
260299	CADM4	93.6713	2.49702	0.675563	3.6962	0.00021885	0.00635844
50781	DKK3	94.4661	-2.91655	0.792918	-3.67825	0.000234839	0.00676666
233332	ADAMTS17	10.6461	3.5066	0.953886	3.67612	0.000236806	0.00678894
80891	Fcrls	6219.87	-1.80114	0.491431	-3.6651	0.000247246	0.00702897
75320	ETNK1	3750.7	1.34203	0.366193	3.66482	0.000247512	0.00702897
66857	PLBD1	1288.42	-1.28874	0.352024	-3.66095	0.000251281	0.0071226
14133	Fcna	261.995	2.16172	0.591077	3.65726	0.00025493	0.0072125
636104	#N/A	7.57023	5.58826	1.52996	3.65255	0.000259653	0.0073324
327900	UBTD2	309.535	0.937503	0.258607	3.62521	0.000288731	0.00806313
20304	CCL5	381.275	1.97503	0.545391	3.62131	0.000293111	0.00817035
21834	THRB	72.0175	2.78324	0.769825	3.61542	0.000299858	0.00832768
320440	#N/A	69.988	2.26715	0.627923	3.61055	0.000305548	0.00843916
229898	GBP5	637.865	1.37565	0.381493	3.60596	0.000311002	0.00857413
63954	RBP7	120.504	5.70612	1.58578	3.59831	0.000320295	0.00879821
268807	KLHL38	52.7097	2.18491	0.607648	3.59569	0.000323532	0.00887099
16852	LGALS1	4734.56	-2.23061	0.620915	-3.59246	0.000327573	0.00894931
226245	PLEKHS1	21.734	3.14577	0.879822	3.57547	0.000349604	0.00949966
21828	THBS4	217.51	-2.40738	0.673536	-3.57425	0.000351237	0.00951524
63959	SLC29A1	1841.97	1.82216	0.509823	3.5741	0.000351437	0.00951524
13602	SPARCL1	1119.53	2.07707	0.584786	3.55185	0.000382535	0.0103018
26557	HOMER2	156.085	2.35926	0.66606	3.54212	0.00039693	0.0105951
