# Supplementary figures and images for: CCL5 promotes breast cancer recurrence through macrophage recruitment in residual tumors
Source: eLife journal article supplement (doi:10.7554/elife.43653), 2019-04-15

Figure 1 - figure supplement 1

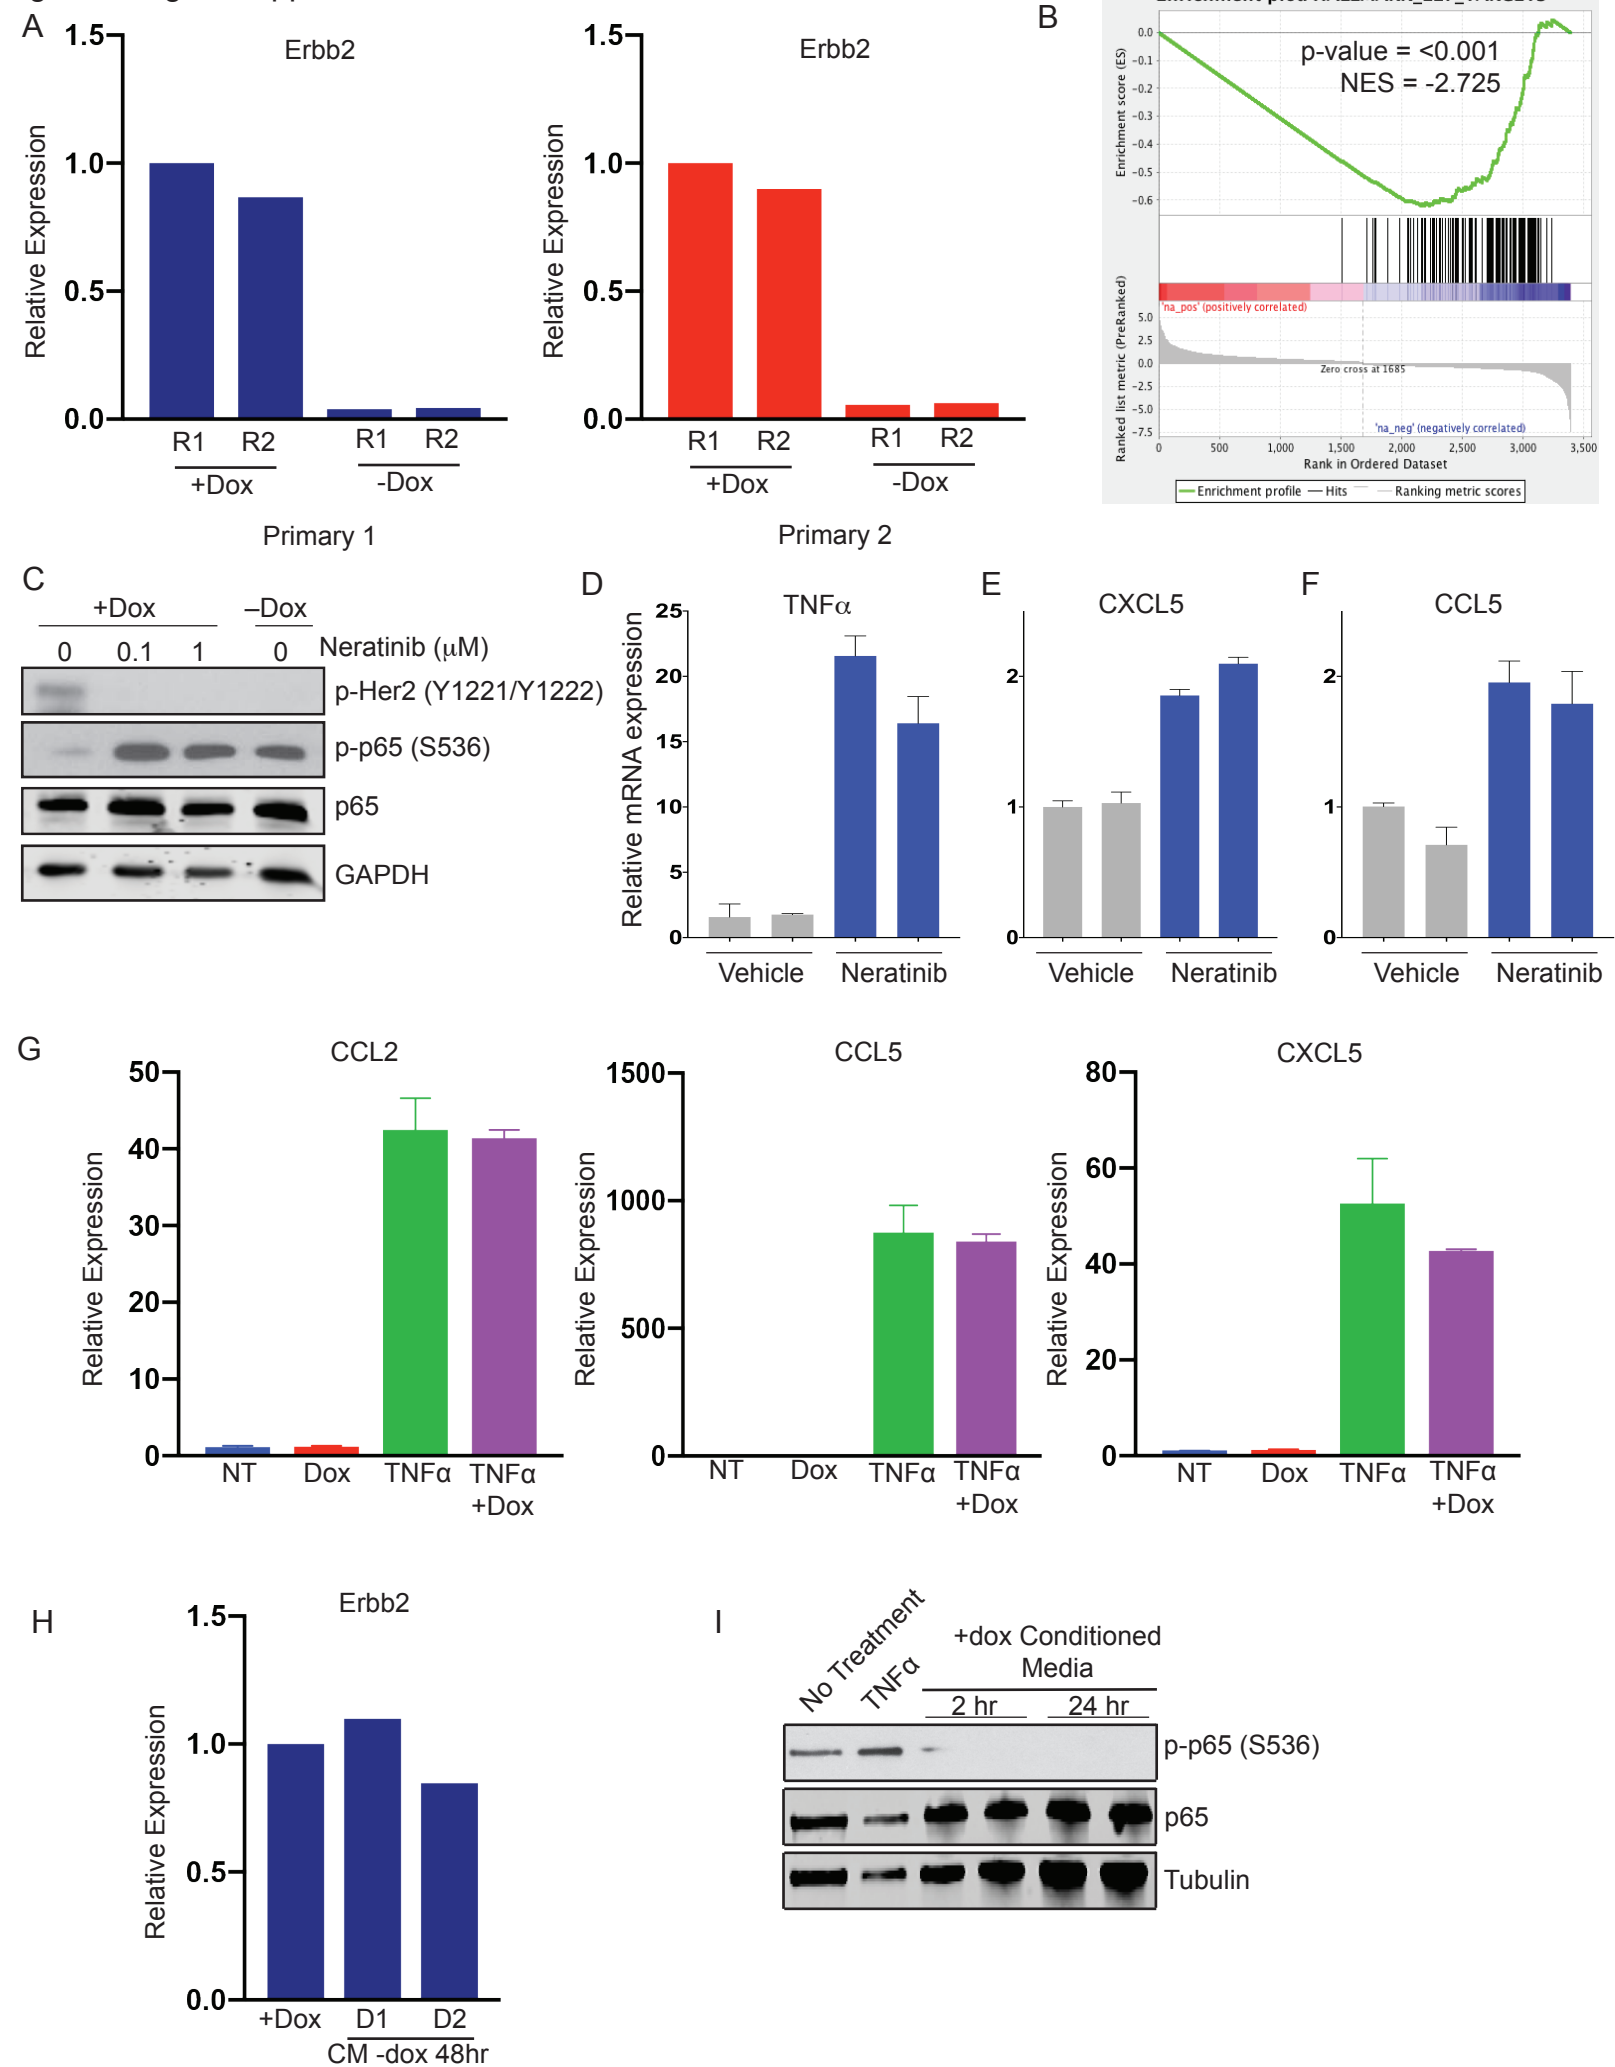

Supplement: supp [file elife-43653-supp-v1.zip]

Figure 5 - figure supplement 1

A

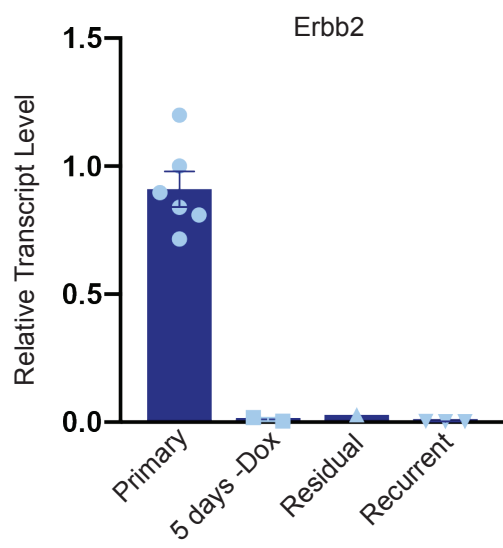

B

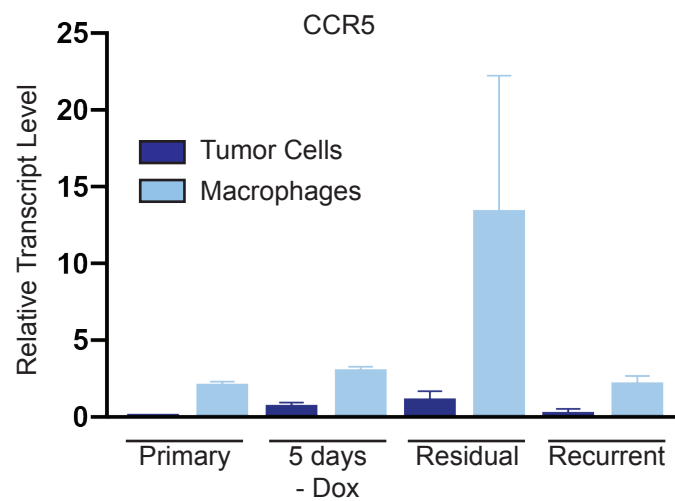

C

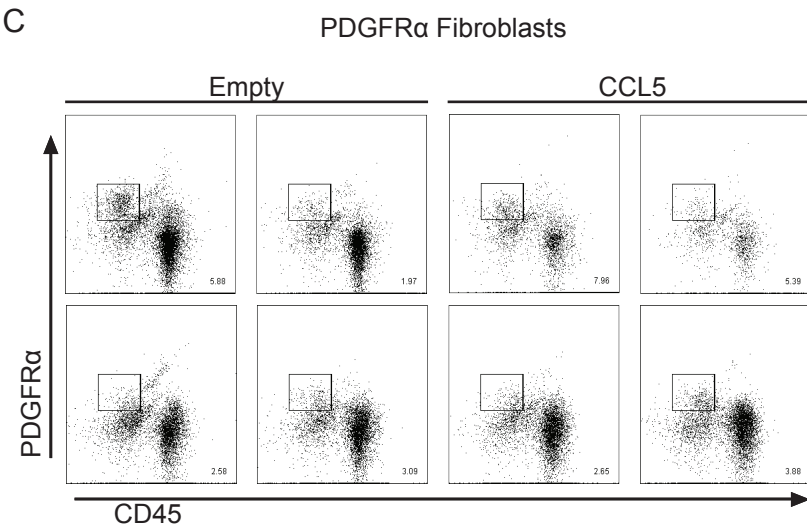

D

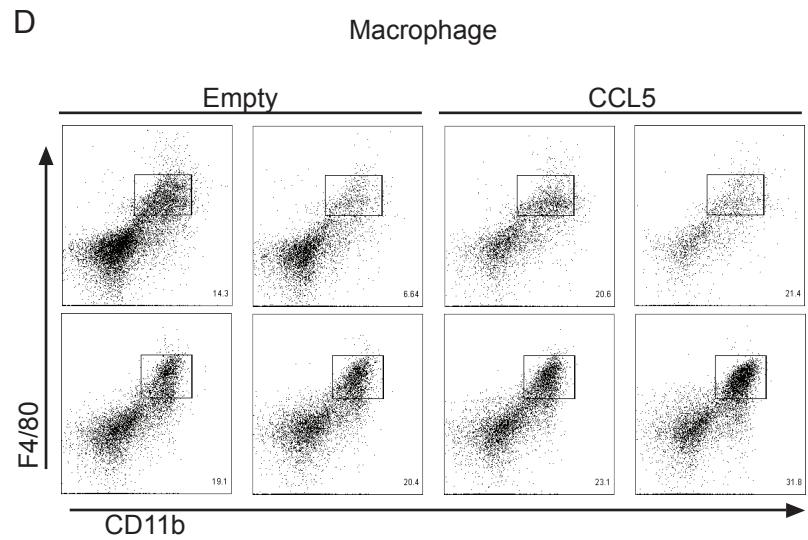

Supplement: supp [file elife-43653-supp-v1.zip]

Figure 5 - figure supplement 2

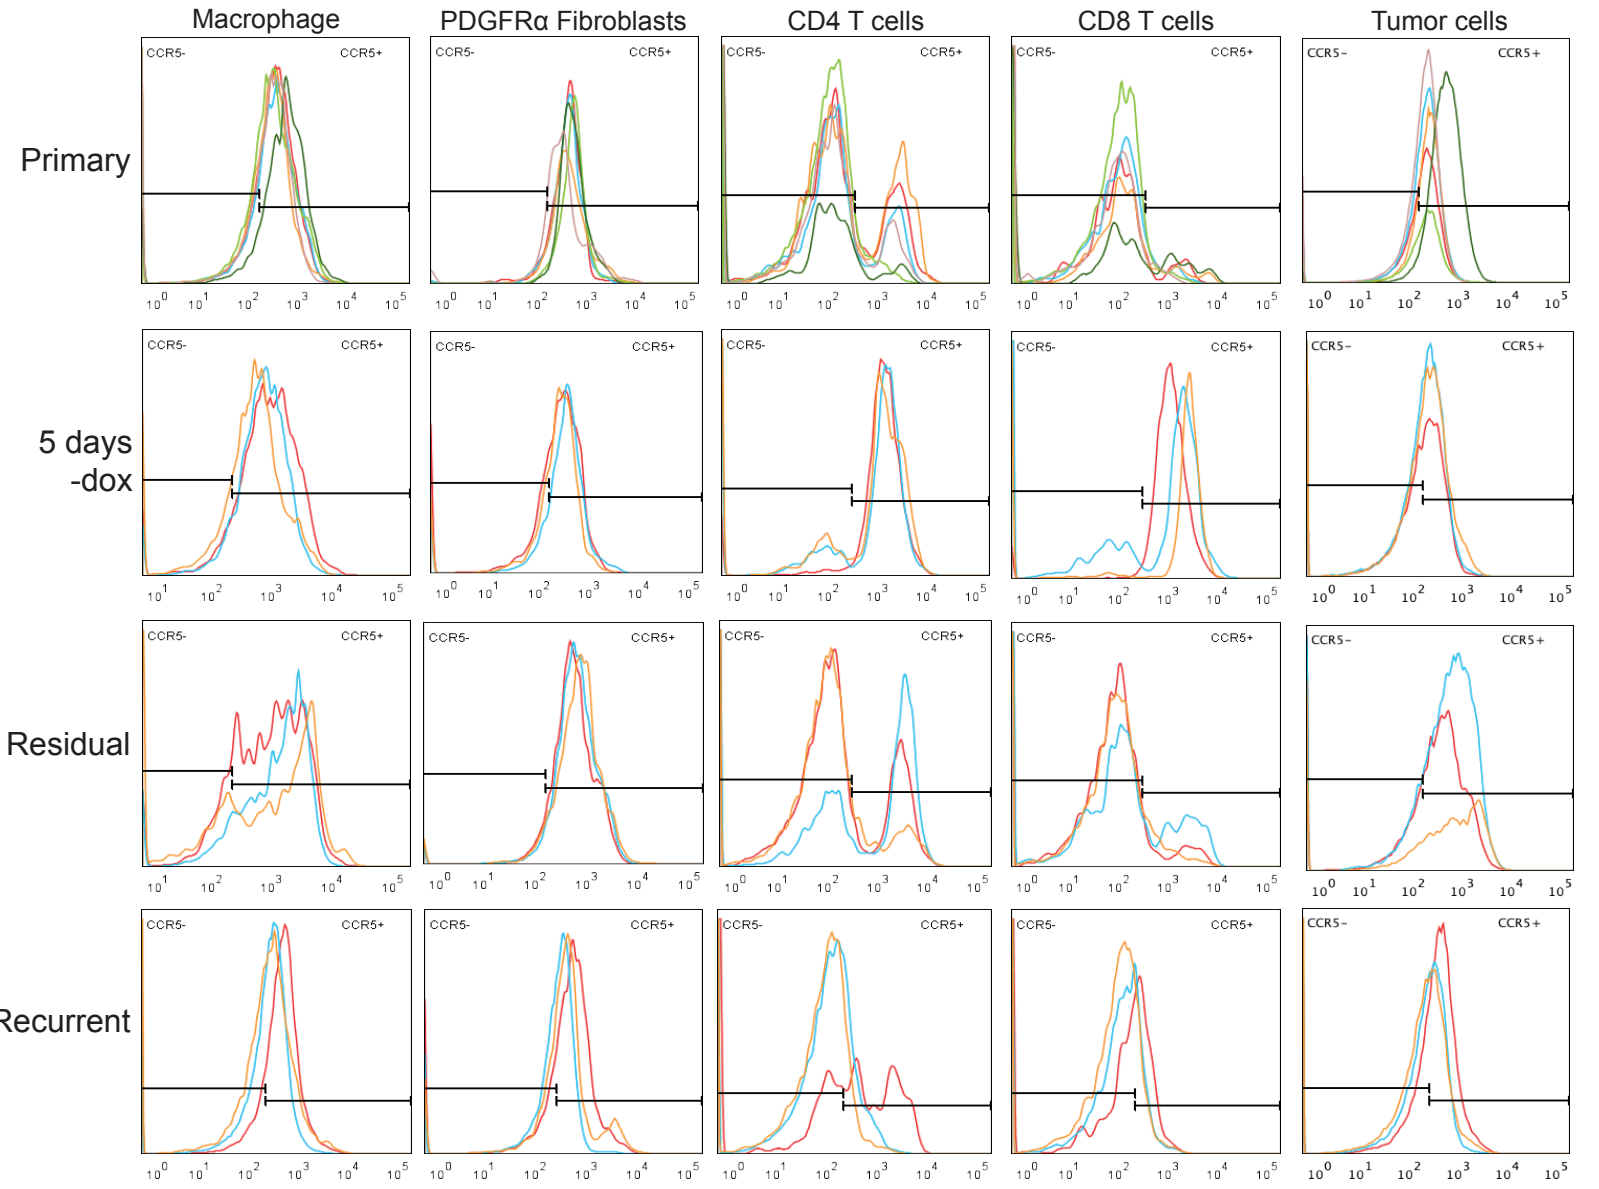

Supplement: supp [file elife-43653-supp-v1.zip › elife_poa_e43653_Figure_5_figure_supplement_2.pdf]

Figure 3 - figure supplement 1

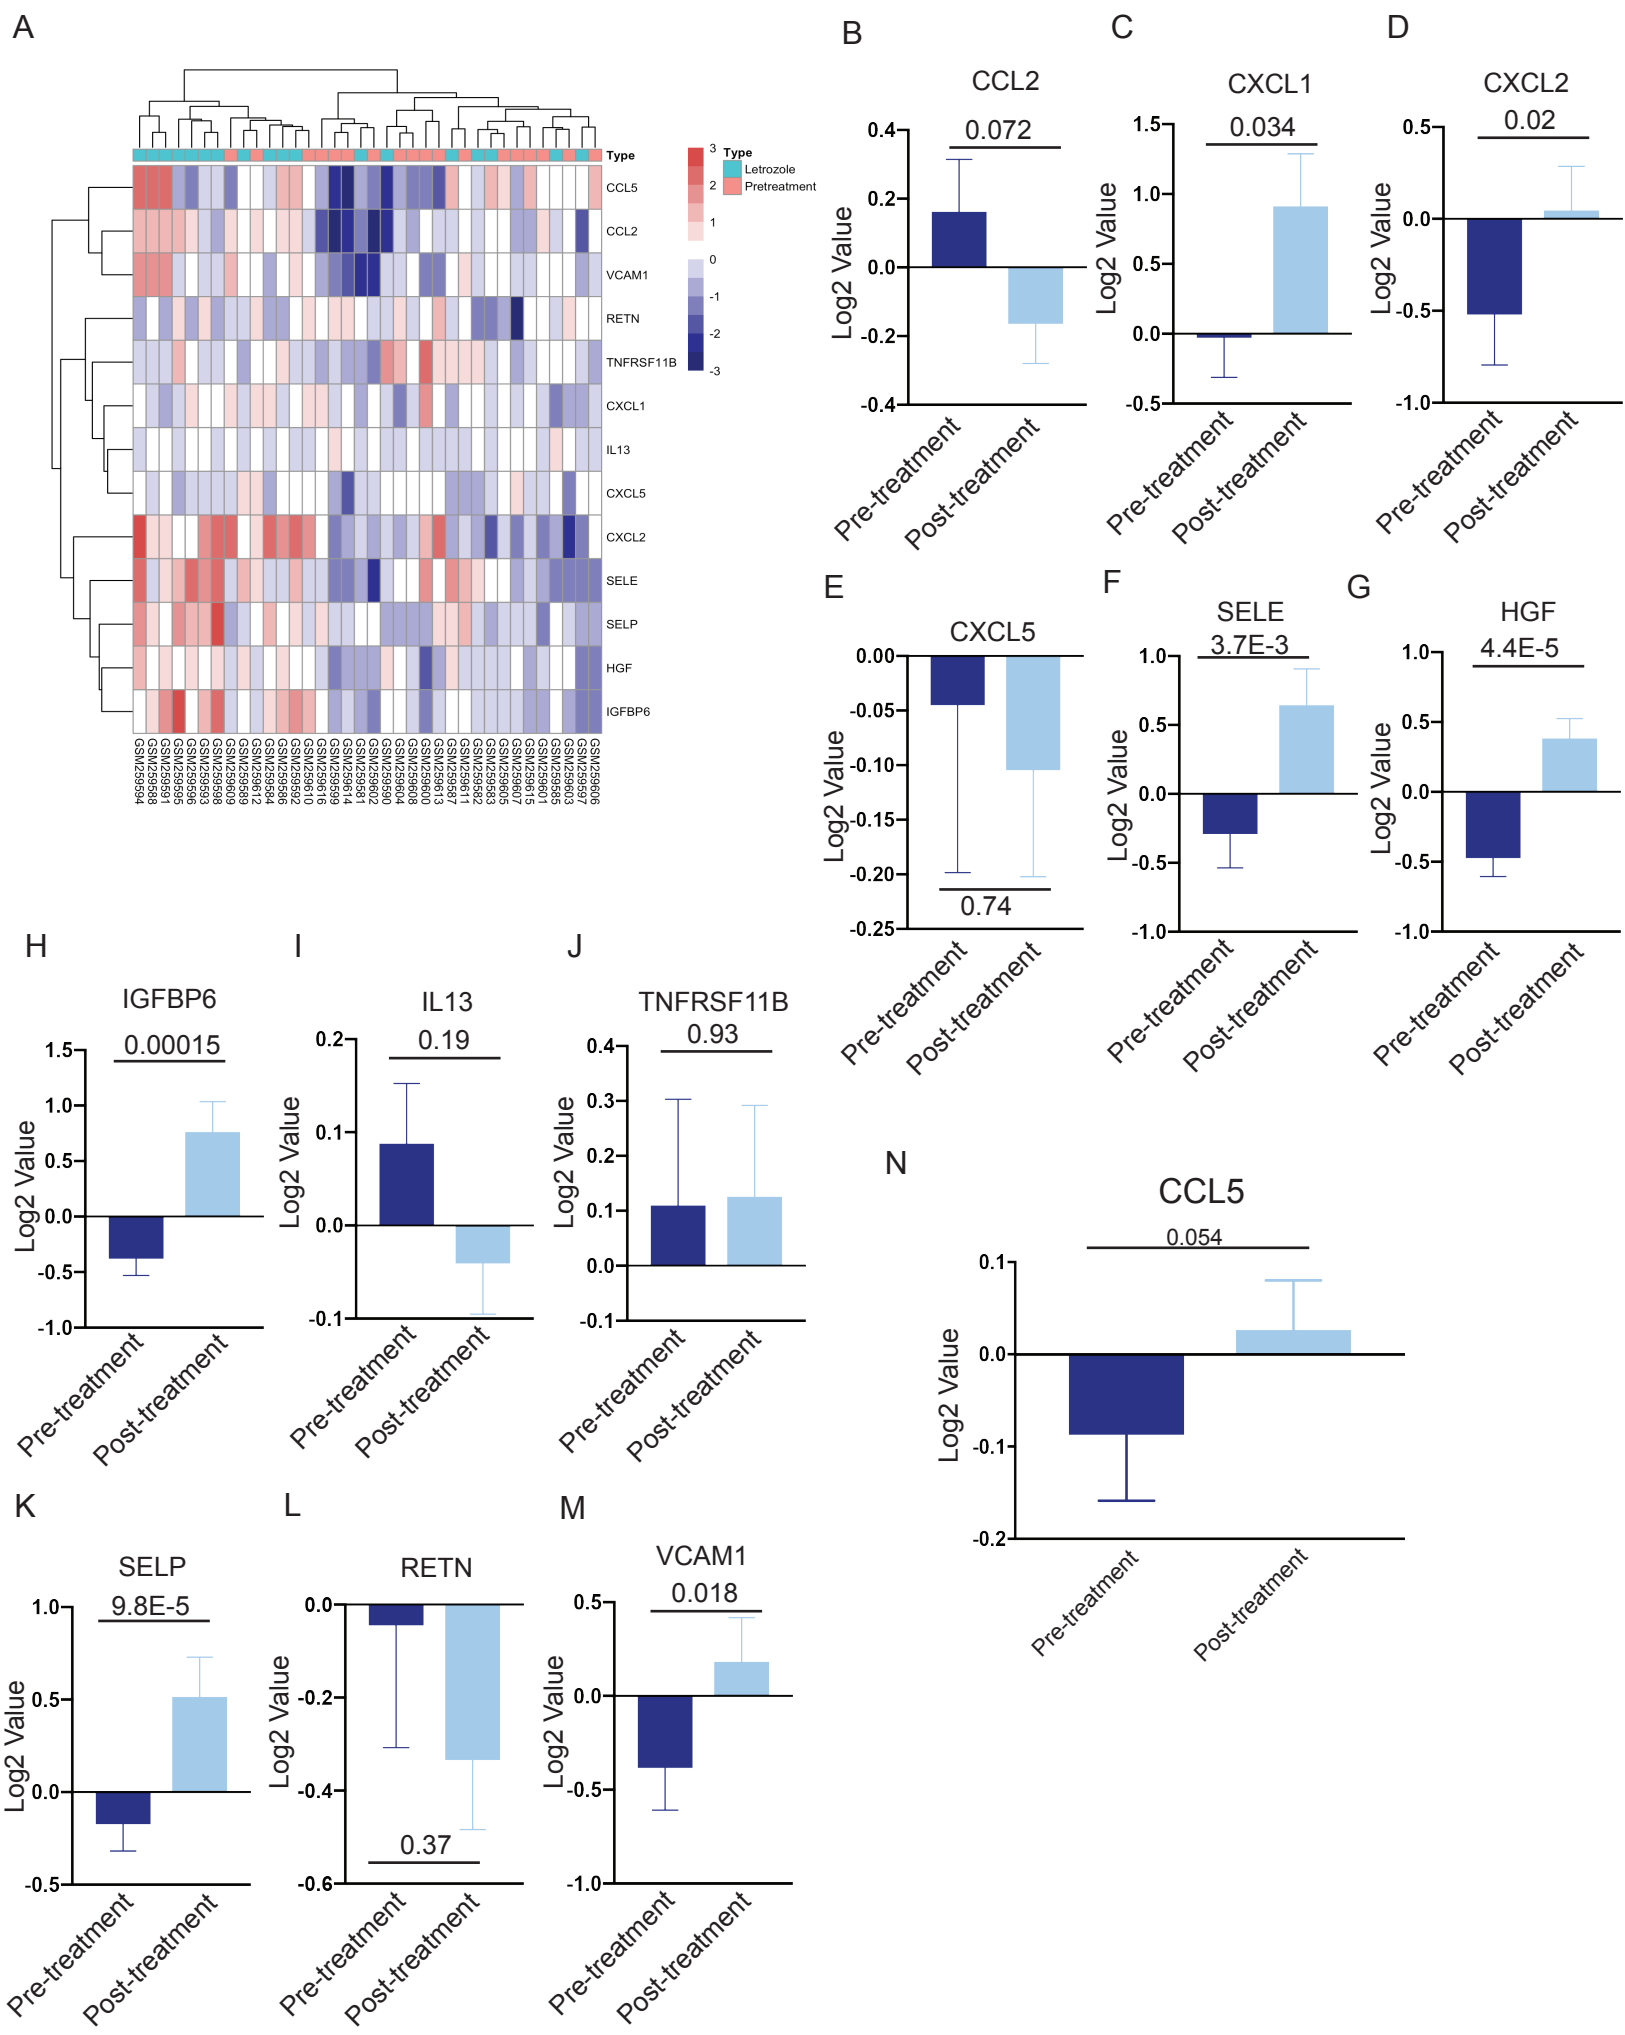

Supplement: supp [file elife-43653-supp-v1.zip › elife_poa_e43653_Figure_3_figure_supplement_1.pdf]

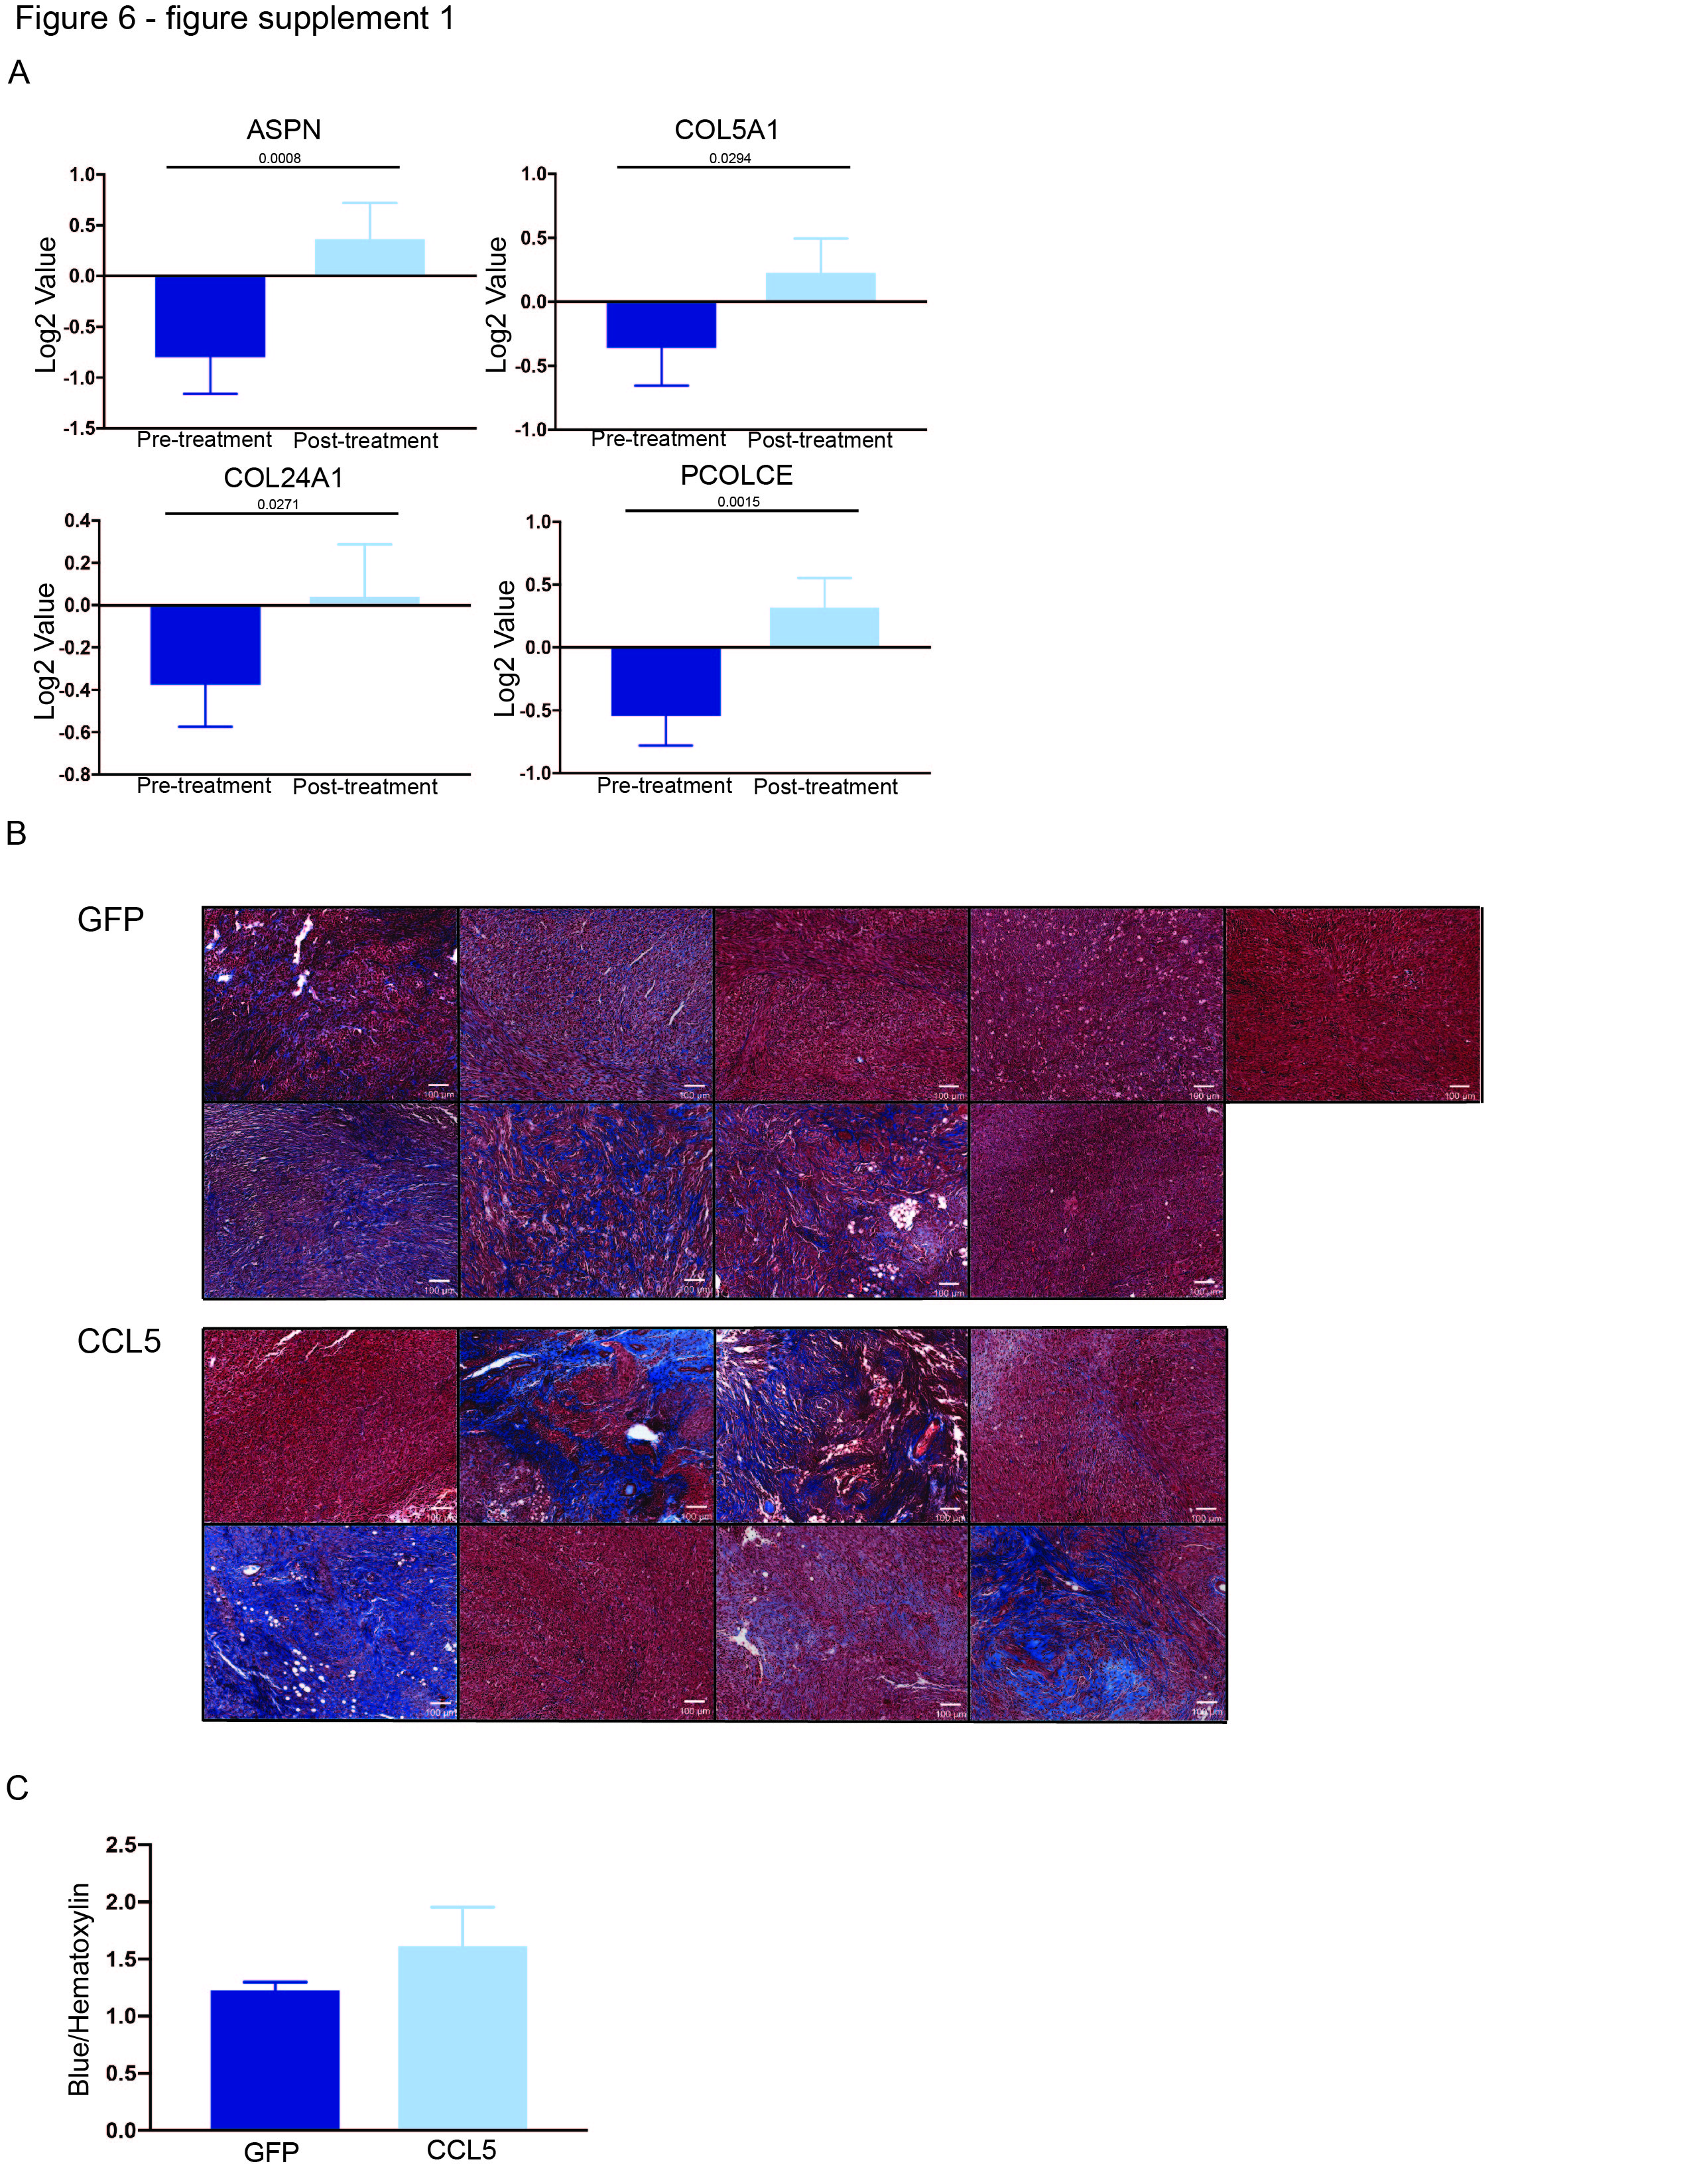

Supplement: supp [file elife-43653-supp-v1.zip › elife_poa_e43653_Figure_6_figure_supplement_1.jpg]

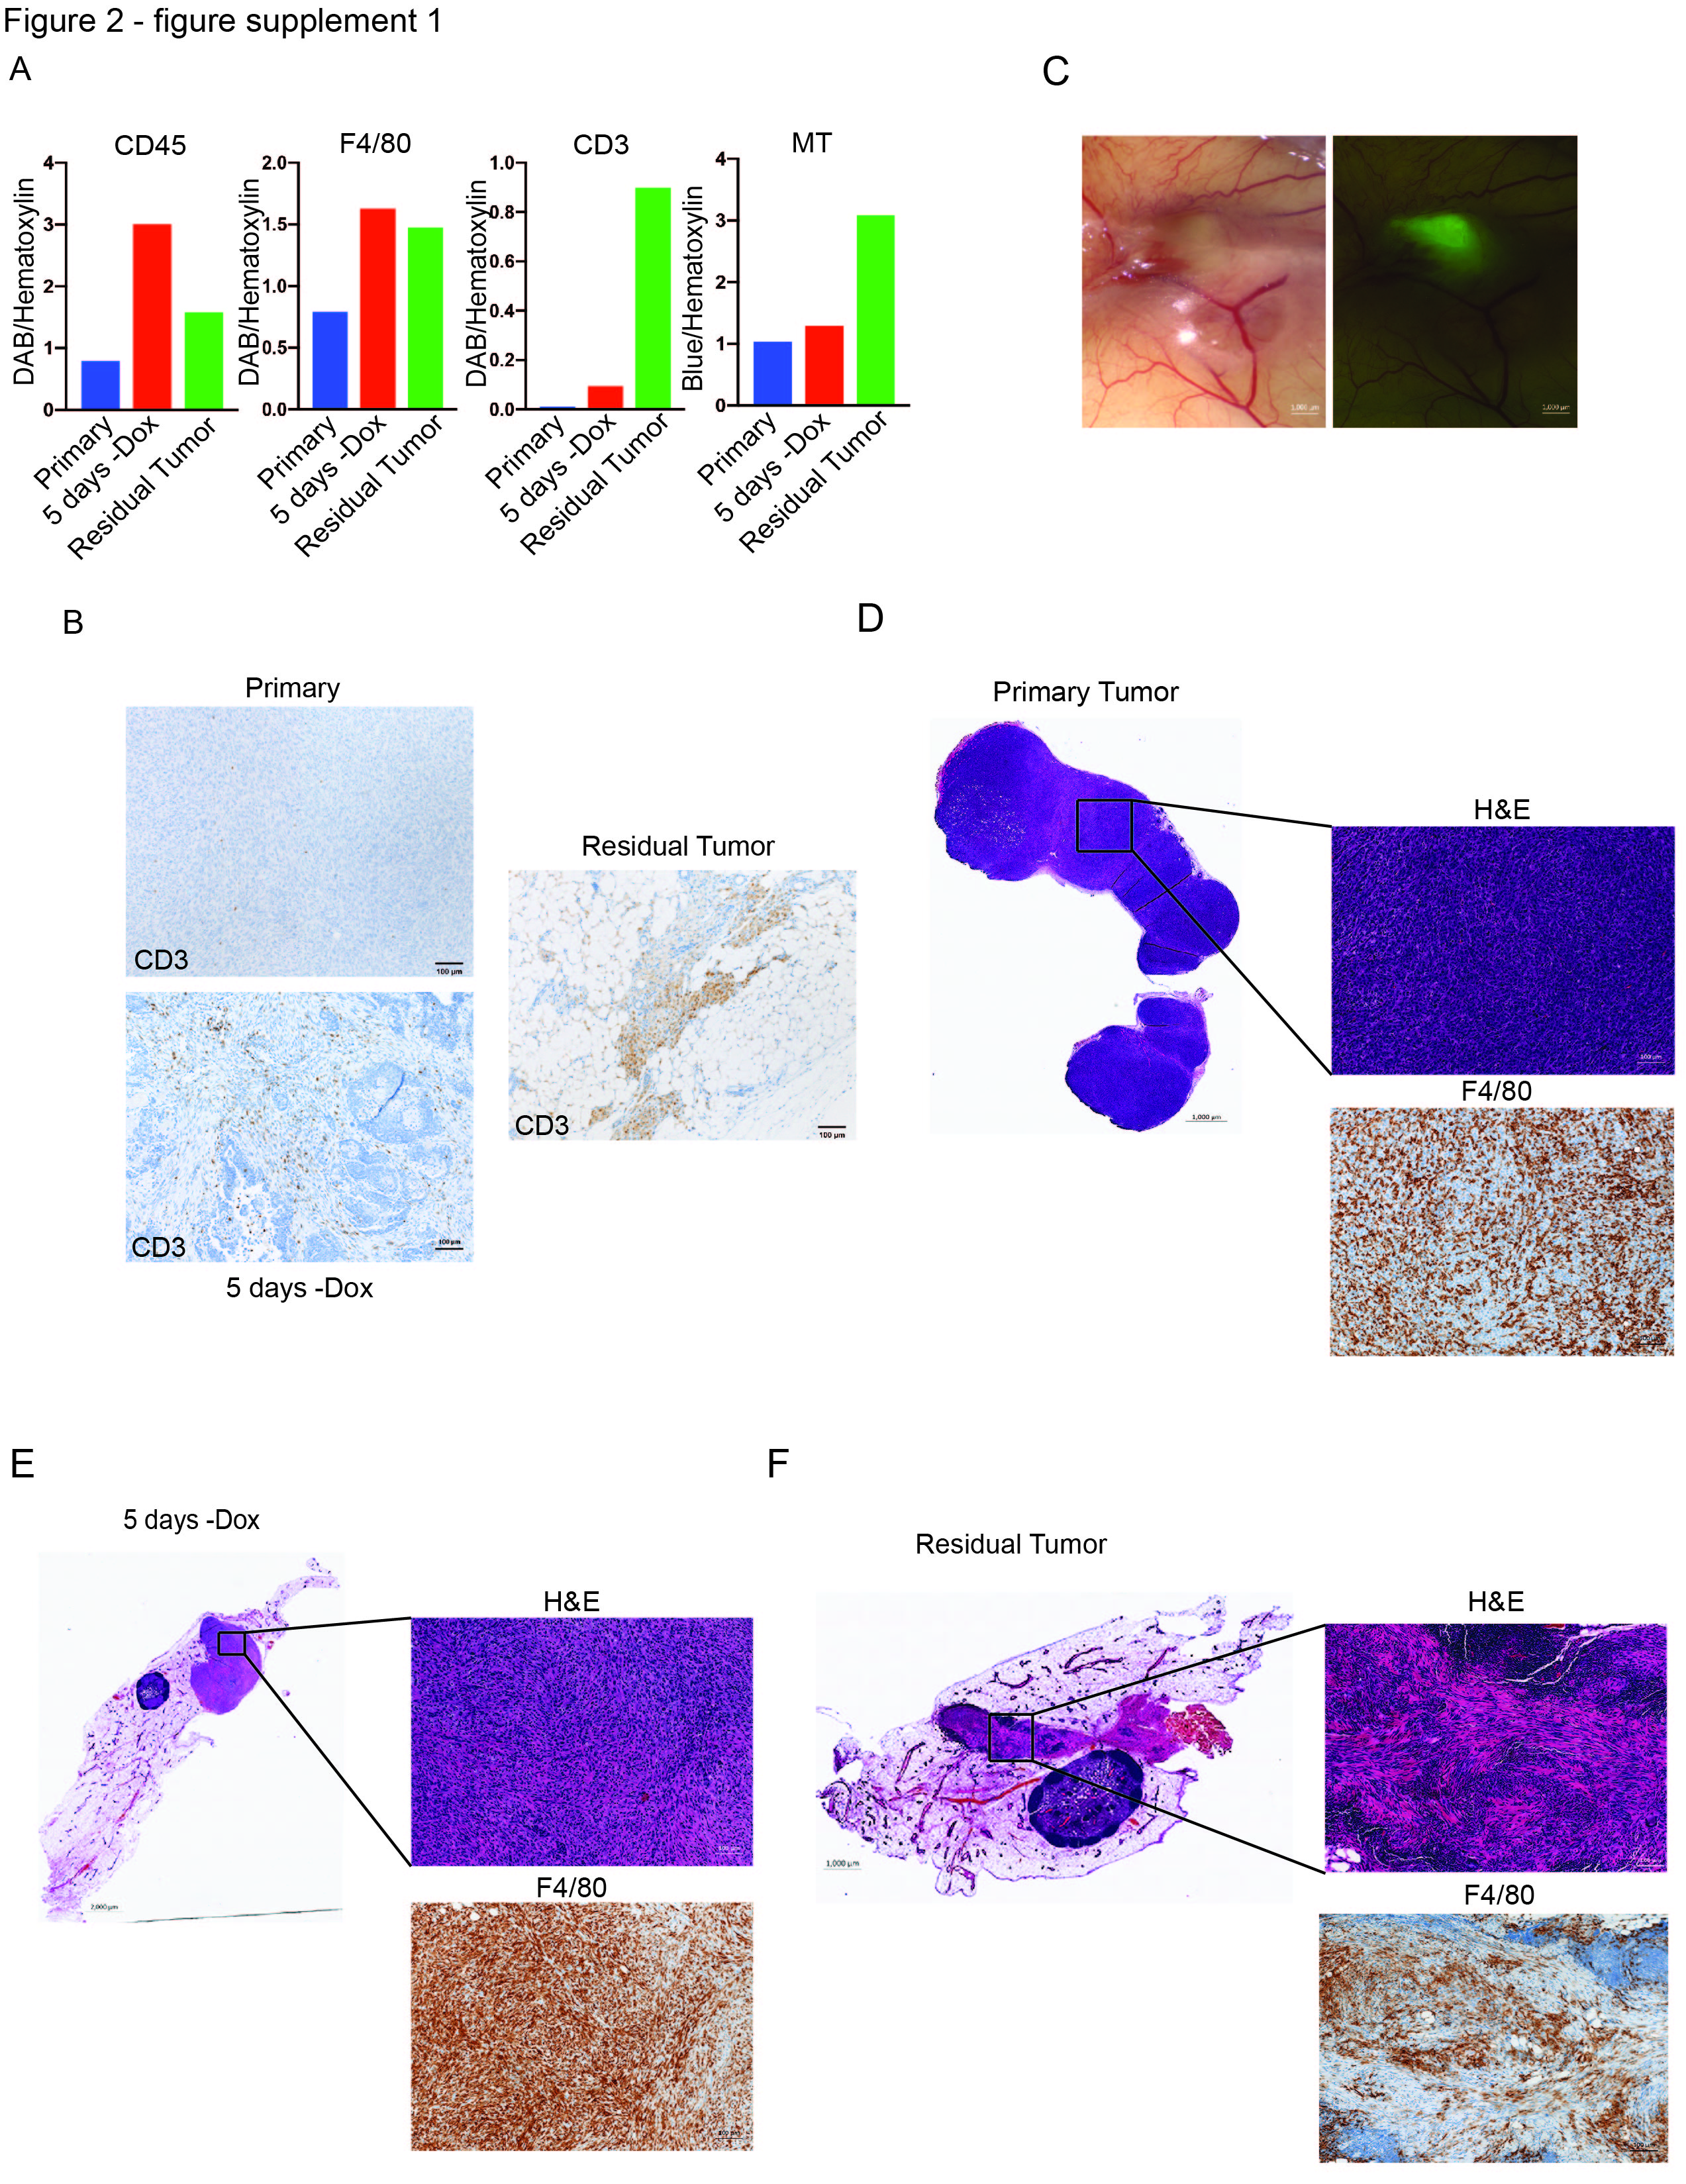

Supplement: supp [file elife-43653-supp-v1.zip › elife_poa_e43653_Figure_2_figure_supplement_1.jpg]
